# Supplementary material for: Controlled Knoevenagel reactions of methyl groups of 1,3,5,7-tetramethyl BODIPY dyes for unique BODIPY dyes
Source: Royal Society of Chemistry journal article supplement (doi:10.1039/c1ra00678a), 2011-11-04
Supplement: c1ra00678a.pdf [file c1ra00678a.pdf]

## Supporting Information

### Controlled Knoevenagel Reactions of Methyl Groups of 1,3,5,7-Tetramethyl BODIPY Dyes for Unique BODIPY Dyes

Shilei Zhu,<sup>a</sup> Jingtuo Zhang,<sup>a</sup> Giri Vegesna,<sup>a</sup> Ashutosh Tiwari,<sup>a</sup> Fen-Tair Luo,<sup>b</sup> Matthias Zeller,<sup>c</sup>  
Rudy Luck,<sup>a</sup> Haihua Li,<sup>d</sup> Sarah Green<sup>a</sup> and Haiying Liu<sup>a\*</sup>

<sup>a</sup>Department of Chemistry, Michigan Technological University, Houghton, Michigan 49931,  
[hyliu@mtu.edu](mailto:hyliu@mtu.edu).

<sup>b</sup>Institute of Chemistry, Academia Sinica, Taipei, Taiwan 11529, Republic of China.

<sup>c</sup>Department of Chemistry, Youngstown State University, Youngstown, OH 44555.

<sup>d</sup>University Libraries, University of Alabama, Tuscaloosa, AL 35487, United States

| Supporting information                                                                                                                                                | page    |
|-----------------------------------------------------------------------------------------------------------------------------------------------------------------------|---------|
| <b>I.</b> A list of the contents                                                                                                                                      | S1      |
| <b>II.</b> Experimental section                                                                                                                                       | S2-S11  |
| <b>III.</b> Comparison of <sup>1</sup> H spectra of BODIPY dyes <b>4</b> , <b>A</b> , <b>B</b> and <b>C</b>                                                           | S12     |
| <b>IV.</b> Comparison of <sup>1</sup> H spectra of BODIPY dyes <b>6</b> , <b>D<sub>a</sub></b> , <b>E<sub>a</sub></b> , <b>F<sub>a</sub></b> and <b>G<sub>a</sub></b> | S13-S14 |
| <b>V.</b> <sup>1</sup> H and <sup>13</sup> C spectra of BODIPY dyes.                                                                                                  | S15-S40 |
| <b>VI.</b> X-ray structures of BODIPY dyes <b>4</b> and <b>6</b>                                                                                                      | S41-S53 |
| <b>VII.</b> Absorption and fluorescence spectra of BODIPY dyes                                                                                                        | S54-S60 |
| <b>VIII.</b> Visualized images of BODIPY dyes <b>E<sub>b</sub></b> and <b>G<sub>b</sub></b> in the absence and presence of cysteine                                   | S61     |
| <b>IX.</b> Absorption and fluorescence spectra of BODIPY dye <b>G<sub>b</sub></b> in the absence and presence of cysteine                                             | S62     |
| <b>X.</b> Absorption and Emission spectra of BODIPY dye <b>G<sub>b</sub></b> with and without various amino acid addition                                             | S63     |
| <b>XI.</b> References                                                                                                                                                 | S63     |

## Experimental Section

**Instrumentation and methods**  $^1\text{H}$  NMR and  $^{13}\text{C}$  NMR spectra were taken on a 400 MHz Varian Unity Inova spectrophotometer instrument.  $^1\text{H}$  and  $^{13}\text{C}$  NMR spectra were recorded in  $\text{CDCl}_3$ , chemical shifts ( $\delta$ ) are given in ppm relative to solvent peaks ( $^1\text{H}$ :  $\delta$  7.26;  $^{13}\text{C}$ :  $\delta$  77.3) as internal standard. Absorption spectra were taken on a Perkin Elmer Lambda 35 UV/VIS spectrometer. Fluorescence spectra were recorded on a Jobin Yvon Fluoromax-4 spectrofluorometer. The excitation and emission slit width were set to 1 nm for quantum yield calculations and all samples were scanned with increments of 1 nm. Fluorescence quantum yields of BODIPY dyes were measured in dichloromethane and aqueous solution by using standard 1 cm path-length quartz fluorescence cell. And they were calculated by using fluorescein excited at 490 nm in 0.1 N NaOH aqueous solution as the reference quantum efficiency ( $\phi_n = 85\%$ ).<sup>1-4</sup> Concentrations of BODIPY dyes ranging from  $1.0 \times 10^{-6}$  mol/L to  $5.0 \times 10^{-6}$  mol/L (in which the quantum yields do not change with varying concentration) were used to measure fluorescence quantum yields, absorption and fluorescent spectra.

All the spectra of BODIPY dye for fluorescence sensing of L-cysteine were measured in 0.01 M PBS buffer pH 7.4 at room temperature. The L-cysteine stock solution (1.0 M in 0.01 M PBS buffer pH 7.4) was prepared freshly for every single measurement. Small portion of L-cysteine stock solution (25  $\mu\text{L}$ ) was added to 2.5 mL PBS buffer solution of BODIPY dye **E<sub>b</sub>** or **G<sub>b</sub>** (20  $\mu\text{M}$ ) and then the solution was measured by UV-vis absorption spectroscopy and fluorescence spectroscopy every 60 minutes until near saturation. The excitation and emission slit width used was 3 nm for L-cysteine fluorescent sensing with excitation wavelength of 470 nm and 620 nm for BODIPY dyes **E<sub>b</sub>** and **G<sub>b</sub>**, respectively. For measurement of selectivity to various amino acids, BODIPY dye **G<sub>b</sub>** (10  $\mu\text{M}$ ) was treated with 500 equiv. series of amino acids including Alanine (Ala), Arginine (Arg), Asparagine (Asn), Aspartic acid (Asp), Ethionine (Eth), Glycine (Gly), Leucine (Leu), Lysine (Lys), Methionine (Met), Phenylalanine (Phe), Proline (Pro), Serine (Ser), Threonine (Thr), Tyrosine (Tyr), Valine (Val) in 0.01M PBS buffer solution pH 7.4 for 10 hours at room temperature. And the 3 nm excitation and 4 nm emission slit width were used for all fluorescence spectra collection. L-cysteine and other amino acids were purchased from Sigma-Aldrich and other reagents are analytical grade and were used without further purification.

## General remarks for the synthesis

**Materials.** Unless otherwise indicated, all reagents and solvents were obtained from commercial suppliers (Aldrich, Sigma, Fluka, Acros Organics, Fisher Scientific, Lancaster) and used without further purification. Air- and moisture-sensitive reactions were conducted in oven-dried glassware using a standard Schlenk line or drybox techniques under an inert atmosphere of dry nitrogen.

### **4,4-Difluoro-8-(4-methoxyphenyl)-1,3,5,7-tetramethyl-4-bora-3a,4a-diaza-s-indacene (2).**

The 4-methoxybenzaldehyde (3.26 g, 24 mmol) and 2,4-dimethylpyrrole (5.0 g, 52.6 mmol) were dissolved in dry CH<sub>2</sub>Cl<sub>2</sub> (1000 mL). Eight drops of trifluoroacetic acid (TFA) were added to the reaction mixture, and the resulting mixture was stirred in the dark for 12 h under nitrogen atmosphere at room temperature. After the complete consumption of aldehyde, DDQ (2,3-dichloro-5,6-dicyano-1,4-benzoquinone) (6.54 g, 28.8 mmol) was added to the reaction mixture. When the mixture was stirred for 40 min, 25 mL of diisopropylethylamine (DIPEA) and 25 mL of BF<sub>3</sub>·OEt<sub>2</sub> were added to the mixture. After the mixture was further stirred for 40 min, it was concentrated, and then was washed twice with water, dried over anhydrous Na<sub>2</sub>SO<sub>4</sub>, and concentrated under reduced pressure. The crude product was purified by column chromatography to obtain orange-red crystal solid **2** (2.63 g, 31%). <sup>1</sup>H NMR (400 MHz, CDCl<sub>3</sub>): δ 7.15 (d, *J* = 8.4 Hz, 2H), 6.99 (d, *J* = 8.4 Hz, 2H), 5.97 (s, 2H), 3.86 (s, 3H), 2.54 (s, 6H), 1.42 (s, 6H). <sup>13</sup>C NMR (100 MHz, CDCl<sub>3</sub>): δ 160.4, 155.4, 143.4, 142.1, 132.1, 129.4, 127.2, 121.3, 114.7, 55.5, 14.7.

### **4,4-Difluoro-8-(4-methoxyphenyl)-1,3,5,7-tetramethyl-2-formyl-4-bora-3a,4a-diaza-s-indacene (3).<sup>5</sup>**

A mixture of DMF (6 mL) and POCl<sub>3</sub> (6 mL) was stirred in an ice bath for 5 min under argon. After the solution was warmed to room temperature, it was stirred for additional 30 min. To this reaction mixture was added compound **2** (149 mg, 0.42 mmol) in dichloroethane (50 mL), the temperature was raised to 50 °C, and the mixture was stirred for an additional 2 h. The reaction

mixture was cooled to room temperature and slowly poured into saturated aqueous  $\text{NaHCO}_3$  (300 mL) under ice-cold conditions. After being warmed to room temperature, the reaction mixture was further stirred for 60 min and washed with water. The organic layers were combined, dried over anhydrous  $\text{Na}_2\text{SO}_4$ , and evaporated in vacuo. The crude product was further purified using column chromatography (silica gel, hexane/EtOAc/ $\text{CH}_2\text{Cl}_2$ , 4/0.5/2, v/v) to give BODIPY **3** (142 mg, 89%) as red crystal solid.  $^1\text{H}$  NMR (400 MHz,  $\text{CDCl}_3$ ):  $\delta$  9.98 (s, 1H), 7.14 (d,  $J = 8.4$  Hz, 2H), 7.02 (d,  $J = 8.4$  Hz, 2H), 6.12 (s, 1H), 3.86 (s, 3H), 2.79 (s, 3H), 2.58 (s, 3H), 1.69 (s, 3H), 1.45 (s, 3H).  $^{13}\text{C}$  NMR (100 MHz,  $\text{CDCl}_3$ ):  $\delta$  186.1, 161.6, 160.8, 156.6, 147.5, 144.0, 143.1, 134.7, 130.4, 129.2, 126.5, 126.3, 124.1, 115.1, 55.6, 15.3, 13.2, 12.0.

**4,4-Difluoro-8-(4-methoxyphenyl)-1,3,5,7-tetramethyl-2-iodo-6-formyl-4-bora-3a,4a-diazas-indacene (4).**

When iodic acid (597 mg, 3.39 mmol) in 5 mL of water was added dropwise to the ethanol (40 mL) and THF (10 mL) solution containing compound **3** (1.08 g, 2.83 mmol) and iodine (1.08 g, 4.24 mmol) in 30 minutes, the mixture was stirred for 5 h. The mixture was concentrated under reduced pressure, dissolved in  $\text{CH}_2\text{Cl}_2$ , and washed twice with water and saturated saline solution. The organic layer was collected, dried over anhydrous  $\text{Na}_2\text{SO}_4$ , and concentrated under reduced pressure. The crude product was purified by column chromatography to yield BODIPY dye **4** as red crystal solid (1.28 g, 89%).  $^1\text{H}$  NMR (400 MHz,  $\text{CDCl}_3$ ):  $\delta$  10.01 (s, 1H), 7.14 (d,  $J = 6.4$  Hz, 2H), 7.05 (d,  $J = 6.8$  Hz, 2H), 3.89 (s, 3H), 2.81 (s, 3H), 2.68 (s, 3H), 1.70 (s, 3H), 1.48 (s, 3H).  $^{13}\text{C}$  NMR (100 MHz,  $\text{CDCl}_3$ ):  $\delta$  185.9, 161.0, 160.6, 158.0, 148.0, 145.5, 144.2, 134.1, 130.6, 129.2, 127.1, 126.2, 115.3, 115.1, 55.6, 17.8, 16.6, 13.5, 12.2. IR ( $\text{cm}^{-1}$ ): 2834, 1667, 1608, 1545, 1514, 1476, 1425, 1399, 1349, 1310, 1288, 1265, 1247, 1209, 1176, 1107, 1084, 1023, 994, 960, 890, 835, 815, 783, 766, 735, 707, 673. HRMS (FAB) calcd for  $\text{C}_{21}\text{H}_{20}\text{BF}_2\text{I}_2\text{N}_2\text{O}_2\text{I} [\text{M}]^+$ , 508.0631; found, 508.0627.

**4,4-Difluoro-8-(4-methoxyphenyl)-1,5,7-trimethyl-2-iodo-6-formyl-3-[(1E)-3,4,5-trimethoxyphenyl]-4-bora-3a,4a-diaza-s-indacene (A).**

**4,4-Difluoro-8-(4-methoxyphenyl)-1,5-dimethyl-2-iodo-6-formyl-3,7-bis-[(1E)-3,4,5-trimethoxyphenyl]-4-bora-3a,4a-diaza-s-indacene (B).**

**4,4-Difluoro-8-(4-methoxyphenyl)-1-methyl-2-iodo-6-formyl-3,5,7-tri-[(1E)-3,4,5-trimethoxyphenyl]-4-bora-3a,4a-diaza-s-indacene (C).**

When BODIPY dye **4** (270 mg, 0.53 mmol), and compound **5a** (2.0 g, 10.2 mmol) were dissolved in a mixture of toluene (250 mL), piperidine (0.8 mL) and AcOH (0.6 mL), the mixture was stirred at 108 °C under reflux for 4 h. Any water formed during the reaction was removed azeotropically by using a Dean-Stark apparatus. After the reaction was quenched with water at room temperature, the mixture was diluted with EtOAc and washed with water and brine, respectively. The organic layer was collected, dried over Na<sub>2</sub>SO<sub>4</sub> and concentrated in vacuo. The crude product was purified by silica gel column chromatography by using mobile phase (hexane/EtOAc/CH<sub>2</sub>Cl<sub>2</sub>, 4/0.5/2 to 3/1/2, v/v) to obtain monostyryl BODIPY dye **A** (36 mg, 10%) as purple crystal solid, distyryl BODIPY dye **B** (168 mg, 37%) as blue powder and tristyryl BODIPY dye **C** (23 mg, 5%) as green powder and recovered compound **5a** (1.5 g). Monostyryl BODIPY dye **A**, <sup>1</sup>H NMR (400 MHz, CDCl<sub>3</sub>): δ 10.02 (s, 1H), 8.10 (d, *J* = 16.8 Hz, 1H), 7.54 (d, *J* = 16.8 Hz, 1H), 7.18 (d, *J* = 6.8 Hz, 2H), 7.06 (d, *J* = 6.8 Hz, 2H), 6.85 (s, 2H), 3.94 (s, 6H), 3.90 (s, 3H), 3.89 (s, 3H), 2.85 (s, 3H), 1.72 (s, 3H), 1.54 (s, 3H). <sup>13</sup>C NMR (100 MHz, CDCl<sub>3</sub>): δ 186.0, 161.0, 158.4, 153.7, 153.0, 148.5, 145.6, 143.2, 141.3, 140.2, 134.9, 132.2, 131.3, 129.4, 127.4, 126.4, 118.0, 115.3, 105.2, 61.2, 56.5, 55.6, 18.2, 13.7, 12.3. IR (cm<sup>-1</sup>): 2923, 2844, 1649, 1613, 1580, 1504, 1470, 1413, 1354, 1312, 1269, 1248, 1210, 1182, 1157, 1100, 1047, 1004, 993, 952, 900, 844, 817, 797, 771, 747, 712, 675, 662. HRMS (FAB) calcd for C<sub>31</sub>H<sub>30</sub>BF<sub>2</sub>N<sub>2</sub>O<sub>5</sub>I [M]<sup>+</sup>, 686.1260; found, 686.1259. Distyryl BODIPY dye **B**, <sup>1</sup>H NMR (400 MHz, CDCl<sub>3</sub>): δ 9.85 (s, 1H), 8.12 (d, *J* = 16.8 Hz, 1H), 7.55 (d, *J* = 16.4 Hz, 1H), 7.21 (d, *J* = 7.6 Hz, 2H), 6.99 (d, *J* = 7.6 Hz, 2H), 6.84 (s, 2H), 6.40 (d, *J* = 16.0 Hz, 1H), 6.24 (s, 2H), 5.75 (d, *J* = 16.0 Hz, 1H), 3.92-3.81 (s × 6 OCH<sub>3</sub>, 18H), 3.71 (s, 3H), 2.90 (s, 3H), 1.53 (s, 3H). <sup>13</sup>C NMR (100 MHz, CDCl<sub>3</sub>): δ 187.3, 160.8, 158.0, 153.7, 153.5, 153.1, 148.3, 145.3, 141.6, 140.2, 139.2, 138.2, 135.1, 132.1, 132.0, 131.0, 130.5, 126.4, 126.3, 118.9, 118.0, 115.1, 105.3, 104.1, 94.6, 85.0, 61.2, 61.1, 56.5, 56.2, 55.4, 18.3, 14.7. IR (cm<sup>-1</sup>): 2938, 2839, 1731, 1661, 1618, 1579, 1505,

1468, 1418, 1382, 1360, 1321, 1270, 1249, 1162, 1151, 1128, 1103, 1073, 1005, 956, 856, 839, 819, 798, 763, 753, 714, 699, 685. HRMS (FAB) calcd for  $C_{41}H_{40}BF_2N_2O_8I [M]^+$ , 864.1890; found, 864.1883. Tristyryl BODIPY dye **C**,  $^1H$  NMR (400 MHz,  $CDCl_3$ ):  $\delta$  9.85 (s, 1H), 8.15 (d,  $J = 16.8$  Hz, 1H), 8.11 (d,  $J = 16.4$  Hz, 1H), 7.73 (d,  $J = 16.0$  Hz, 1H), 7.62 (d,  $J = 16.4$  Hz, 1H), 7.25 (d,  $J = 7.2$  Hz, 1H), 7.01 (d,  $J = 7.6$  Hz, 1H), 6.90 (s, 2H), 6.86 (s, 2H), 6.49 (d,  $J = 16.0$  Hz, 1 H), 6.28 (s, 2H), 5.83 (d,  $J = 16.0$  Hz, 1H), 3.96-3.84 (s  $\times$  9  $OCH_3$ , 27H), 3.71 (s, 3H), 1.57 (s, 3H).  $^{13}C$  NMR (100 MHz,  $CDCl_3$ ):  $\delta$  190.9, 186.8, 160.8, 153.8, 153.7, 153.5, 153.1, 148.1, 147.5, 147.0, 142.8, 141.6, 140.4, 140.0, 139.2, 139.1, 135.6, 132.7, 132.2, 132.0, 130.7, 128.6, 126.9, 126.5, 119.0, 118.1, 117.1, 115.2, 106.9, 105.5, 105.4, 104.2, 61.3, 61.2, 61.1, 56.7, 56.5, 56.4, 56.2, 55.4, 18.3. IR ( $cm^{-1}$ ): 2937, 2837, 1671, 1618, 1579, 1505, 1463, 1418, 1360, 1327, 1246, 1175, 1151, 1126, 1103, 1006, 959, 821, 762, 704. HRMS (FAB) calcd for  $C_{51}H_{50}BF_2N_2O_{11}I [M]^+$ , 1042.2520; found, 1042.2523.

**4,4-Difluoro-8-(4-methoxyphenyl)-1,3,5,7-tetramethyl-2,6-diformyl-4-bora-3a,4a-diaza-s-indacene (6).**

A mixture of DMF (6 mL) and  $POCl_3$  (6 mL) was stirred in an ice bath for 5 min under argon. After the solution was warmed to room temperature, it was stirred for additional 30 min. To this reaction mixture was added compound **3** (160 mg, 0.42 mmol) in dichloroethane (50 mL), the temperature was raised to 60 °C, and the mixture was stirred for an additional 5 h. The reaction mixture was cooled to room temperature and slowly poured into saturated aqueous  $NaHCO_3$  (300 mL) under ice-cold conditions. After being warmed to room temperature, the reaction mixture was further stirred for 60 min and washed with water. The organic layers were combined, dried over anhydrous  $Na_2SO_4$ , and evaporated in vacuo. The crude product was further purified using column chromatography (silica gel, hexane/EtOAc/ $CH_2Cl_2$ , 4/0.5/2, v/v) to give BODIPY **6** (141 mg, 82%) as red crystal solid.  $^1H$  NMR (400 MHz,  $CDCl_3$ ):  $\delta$  10.01(s, 2H), 7.15 (d,  $J = 8.4$  Hz, 2H), 7.06 (d,  $J = 8.4$  Hz, 2H), 3.87 (s, 3H), 2.82 (s, 6H), 1.73 (s, 6H).  $^{13}C$  NMR (100

MHz, CDCl<sub>3</sub>): δ 185.9, 161.2, 160.7, 148.6, 147.8, 132.5, 190.0, 128.2, 125.6, 115.5, 55.7, 13.9, 12.6. IR (cm<sup>-1</sup>): 2925, 2840, 1670, 1608, 1569, 1514, 1471, 1443, 1406, 1380, 1307, 1292, 1250, 1175, 1082, 1026, 1009, 964, 949, 900, 851, 838, 820, 803, 787, 768, 733, 720, 705. HRMS (FAB) calcd for C<sub>22</sub>H<sub>22</sub>N<sub>2</sub>F<sub>2</sub>BO<sub>3</sub> [M+H]<sup>+</sup>, 411.1692; found, 411.1692.

**4,4-Difluoro-8-(4-methoxyphenyl)-3,5,7-trimethyl-2,6-diformyl-1-[(1E)-3,4,5-trimethoxyphenyl]-4-bora-3a,4a-diaza-s-indacene (D<sub>a</sub>).**

**4,4-Difluoro-8-(4-methoxyphenyl)-3,5-dimethyl-2,6-diformyl-1,7-bis-[(1E)-3,4,5-trimethoxyphenyl]-4-bora-3a,4a-diaza-s-indacene (E<sub>a</sub>).**

**4,4-Difluoro-8-(4-methoxyphenyl)-5-methyl-2,6-diformyl-1,3,7-tri-[(1E)-3,4,5-trimethoxyphenyl]-4-bora-3a,4a-diaza-s-indacene (F<sub>a</sub>).**

**4,4-Difluoro-8-(4-methoxyphenyl)-2,6-diformyl-1,3,5,7-tetra-[(1E)-3,4,5-trimethoxyphenyl]-4-bora-3a,4a-diaza-s-indacene (G<sub>a</sub>).**

When BODIPY dye **6** (200 mg, 0.5 mmol), and compound **5a** (2.0 g, 10.2 mmol) were dissolved in a mixture of toluene (350 mL), piperidine (1.0 mL) and AcOH (0.8 mL), the mixture was stirred at 112 °C for 3 h. Any water formed during the reaction was removed azeotropically by using a Dean-Stark apparatus. After the reaction was quenched with water at room temperature, the mixture was diluted with EtOAc and washed with water and brine, respectively. The organic layer was collected, dried over Na<sub>2</sub>SO<sub>4</sub> and concentrated in vacuo. The crude product was

purified by silica gel column chromatography by using mobile phase (hexane/EtOAc/CH<sub>2</sub>Cl<sub>2</sub>, 4/0.5/2 to 3/1/2, v/v) to obtain monostyryl BODIPY dye **D<sub>a</sub>** (40 mg, 14%) as red-purple powder, distyryl BODIPY dye **E<sub>a</sub>** (105 mg, 29%) as blue-purple powder, tristyryl BODIPY dye **F<sub>a</sub>** (48 mg, 11%) as blue powder and tetrasteryl BODIPY dye **G<sub>a</sub>** (16 mg, 3%) as green powder and recovered compound **5a** (1.6 g). Monostyryl BODIPY dye **D<sub>a</sub>**, <sup>1</sup>H NMR (400 MHz, CDCl<sub>3</sub>): δ 10.03 (s, 1H), 9.85 (s, 1H), 7.22 (d, *J* = 8.4 Hz, 2H), 7.01 (d, *J* = 8.4 Hz, 2H), 6.44 (d, *J* = 16.0 Hz, 1H), 6.25 (s, 2H), 5.75 (d, *J* = 16.0 Hz, 1H), 3.83 (s, 3H), 3.81 (s, 6H), 3.72 (s, 3H), 2.90 (s, 3H), 2.85 (s, 3H), 1.77 (s, 3H). <sup>13</sup>C NMR (100 MHz, CDCl<sub>3</sub>): δ 187.1, 185.8, 161.0, 160.9, 160.6, 153.5, 148.1, 146.3, 139.5, 139.4, 132.7, 132.1, 131.6, 130.1, 128.3, 127.1, 125.5, 118.4, 115.3, 104.3, 61.2, 56.2, 55.5, 14.8, 14.0, 12.6. IR (cm<sup>-1</sup>): 2936, 2839, 1670, 1609, 1579, 1507, 1419, 1380, 1317, 1292, 1249, 1165, 1150, 1127, 1085, 1019, 915, 837, 798, 728, 712, 692. HRMS (FAB) calcd for C<sub>32</sub>H<sub>32</sub>BF<sub>2</sub>N<sub>2</sub>O<sub>6</sub> [M+H]<sup>+</sup>, 589.2321; found, 589.2325. Distyryl BODIPY dye **E<sub>a</sub>**, <sup>1</sup>H NMR (400 MHz, CDCl<sub>3</sub>): δ 9.86 (s, 2H), 7.28 (d, *J* = 8.8 Hz, 2H), 6.97 (d, *J* = 8.4 Hz, 2H), 6.50 (d, *J* = 16.0 Hz, 2H), 6.24 (s, 4H), 5.80 (d, *J* = 16.0 Hz, 2H), 3.81 (s, 6H), 3.79 (s, 12H), 3.72 (s, 3H), 2.90 (s, 6H). <sup>13</sup>C NMR (100 MHz, CDCl<sub>3</sub>): δ 187.0, 160.8, 153.5, 147.6, 144.7, 139.6, 139.5, 132.3, 131.6, 131.2, 127.0, 125.6, 118.4, 115.2, 104.3, 61.2, 56.2, 55.2, 14.8. IR (cm<sup>-1</sup>): 2939, 2838, 1669, 1610, 1578, 1502, 1465, 1427, 1378, 1321, 1272, 1246, 1142, 1128, 1025, 1005, 963, 925, 866, 837, 729, 706, 693. HRMS (FAB) calcd for C<sub>42</sub>H<sub>42</sub>BF<sub>2</sub>N<sub>2</sub>O<sub>9</sub> [M+H]<sup>+</sup>, 767.2951; found, 767.2946. Tristyryl BODIPY dye **F<sub>a</sub>**, <sup>1</sup>H NMR (400 MHz, CDCl<sub>3</sub>): δ 9.91 (s, 1H), 9.87 (s, 1H), 8.20 (d, *J* = 16.0 Hz, 1H), 7.76 (d, *J* = 16.0 Hz, 1H), 7.31 (d, *J* = 8.4 Hz, 2H), 6.97 (d, *J* = 8.4 Hz, 2H), 6.93 (s, 2H), 6.54 (d, *J* = 16.0 Hz, 1H), 6.50 (d, *J* = 15.6 Hz, 1H), 6.28 (s, 2H), 6.25 (s, 2H), 5.87 (d, *J* = 15.6 Hz, 1H), 5.84 (d, *J* = 16.0 Hz, 1H), 3.95-3.81 (s × 9 OCH<sub>3</sub>, 27H), 3.56 (s, 3H), 2.98 (s, 3H). <sup>13</sup>C NMR (100 MHz, CDCl<sub>3</sub>): δ 187.1, 186.6, 160.8, 155.9, 153.7, 153.6, 153.5, 149.4, 147.2, 144.6, 143.2, 140.4, 140.2, 139.6, 139.5, 133.4, 132.3, 131.6, 131.4, 127.8, 125.8, 118.5, 118.4, 116.7, 115.2, 105.7, 104.4, 104.3, 61.3, 61.2, 56.5, 56.2, 55.2, 15.0. IR (cm<sup>-1</sup>): 2928, 2840, 1672, 1608, 1579, 1504, 1463, 1417, 1377, 1328, 1245, 1176, 1128, 1006, 836, 764, 709. HRMS (FAB) calcd for C<sub>52</sub>H<sub>51</sub>BF<sub>2</sub>N<sub>2</sub>O<sub>12</sub> [M]<sup>+</sup>, 944.3503; found, 944.3499. Tetrasteryl BODIPY dye **G<sub>a</sub>**, <sup>1</sup>H NMR (400 MHz, CDCl<sub>3</sub>): δ 9.88 (s, 2H), 8.20 (d, *J* = 16.0 Hz, 2H), 7.79 (d, *J* = 16.4 Hz, 2H), 7.33 (d, *J* = 8.4 Hz, 2H), 6.96 (d, *J* = 8.8 Hz, 2H), 6.93 (s, 4H), 6.57 (d, *J* = 16.0 Hz, 2H), 6.28 (s, 4H), 5.90 (d, *J* = 16.0 Hz, 2H), 3.93-3.73 (s × 12 OCH<sub>3</sub>, 36H), 3.55 (s, 3H). <sup>13</sup>C NMR (100 MHz, CDCl<sub>3</sub>): δ 186.6, 160.8, 155.7, 153.7, 153.5, 149.0, 144.5,



141.8, 140.5, 140.3, 139.6, 133.6, 132.4, 131.6, 131.5, 127.8, 126.0, 118.7, 116.8, 115.2, 105.8, 104.4, 61.3, 61.2, 56.5, 56.2, 55.2. IR (cm<sup>-1</sup>): 2918, 2848, 1730, 1670, 1619, 1579, 1501, 1463, 1419, 1381, 1325, 1267, 1244, 1127, 1028, 1003, 964, 822, 735, 701. HRMS (FAB) calcd for C<sub>62</sub>H<sub>61</sub>BF<sub>2</sub>N<sub>2</sub>O<sub>15</sub> [M]<sup>+</sup>, 1122.4133; found, 1122.4128.

**4,4-Difluoro-8-(4-methoxyphenyl)-3,5-dimethyl-2,6-diformyl-1,7-di-[(1E)-3,4-bis(3-{2-[2-(2-methoxyethoxy)ethoxy]ethoxy}-2-{2-[2-(2-methoxyethoxy)ethoxy]ethoxymethyl}-propoxy)phenyl]-4-bora-3a,4a-diaza-s-indacene (E<sub>b</sub>).**

When BODIPY dye **6** (100 mg, 0.244 mmol), and compound **5b** (876 mg, 0.976 mmol) were dissolved in a mixture of toluene (100 mL), piperidine (0.6 mL) and AcOH (0.5 mL), the mixture was stirred at 110 °C for 2 h. Any water formed during the reaction was removed azeotropically by using a Dean-Stark apparatus. After the reaction was quenched with water at room temperature, the mixture was diluted with EtOAc and then washed with water and brine, respectively. The organic layer was collected, dried over Na<sub>2</sub>SO<sub>4</sub> and concentrated in vacuo. The crude product was purified by silica gel column chromatography by using mobile phase (MeOH/hexane/EtOAc/CH<sub>2</sub>Cl<sub>2</sub>, 0.5/5/1/3, v/v) to obtain distyryl BODIPY dye **E<sub>b</sub>** (190 mg, 36%) as purple oil. <sup>1</sup>H NMR (400 MHz, CDCl<sub>3</sub>): δ 9.83 (s, 2H), 7.23 (d, *J* = 7.6 Hz, 7.00 (d, *J* = 8.4 Hz, 2H), 6.69 (d, *J* = 8.0 Hz, 2H), 6.50-6.45 (m, 6H) 5.75 (d, *J* = 16.0 Hz, 2H), 3.98 (d, *J* = 5.6 Hz, 4H), 3.90 (d, *J* = 5.6 Hz, 4H), 3.68 (s, 3H), 3.58-3.44 (m, 112H), 3.31-3.28 (s × 8 OCH<sub>3</sub>, 24H), 2.88 (s, 6H), 2.38-2.35 (m, 4H). <sup>13</sup>C NMR (100 MHz, CDCl<sub>3</sub>): δ 187.1, 161.1, 160.5, 155.1, 150.5, 149.2, 148.0, 144.6, 139.6, 132.2, 130.9, 130.1, 129.2, 126.8, 125.6, 120.3, 117.1, 115.5, 113.1, 112.1, 77.5, 72.1, 70.8, 70.7, 70.7, 70.6, 69.5, 69.4, 69.2, 67.1, 59.2, 55.8, 55.7,

40.2, 40.1, 14.8. HRMS (MAIDL) calcd for  $C_{108}H_{173}BF_2N_2O_{39}Na$   $[M+Na]^+$ , 2194.1572; found, 2194.1599.

**4,4-Difluoro-8-(4-methoxyphenyl)-2,6-diformyl-1,3,5,7-tetra-[(1E)-3,4-bis(3-{2-[2-(2-methoxyethoxy)ethoxy]ethoxy}-2-{2-[2-(2-methoxyethoxy)ethoxy]ethoxymethyl}-propoxy)phenyl]-4-bora-3a,4a-diaza-s-indacene ( $G_b$ ).**

When BODIPY dye **6** (100 mg, 0.244 mmol), and compound **5<sub>b</sub>** (2.2 g, 2.44 mmol) were dissolved in a mixture of toluene (100 mL), piperidine (0.6 mL) and AcOH (0.5 mL), the mixture was stirred at 116 °C for 4 h. Any water formed during the reaction was removed azeotropically by using a Dean-Stark apparatus. The mixture was directly concentrated in vacuo, diluted with EtOAc and then washed with water and brine, respectively. The organic layer was collected, dried over  $Na_2SO_4$  and concentrated in vacuo. The crude product was purified by silica gel column chromatography by using mobile phase (MeOH/hexane/EtOAc/ $CH_2Cl_2$ , 1/5/1/3, v/v) to obtain tetrastaryl BODIPY dye  $G_b$  (403 mg, 42%) as dark green oil.  $^1H$  NMR (400 MHz,  $CDCl_3$ ):  $\delta$  9.79 (s, 2H), 8.10 (d,  $J = 16.0$  Hz, 2H), 7.68 (d,  $J = 16.0$  Hz, 2H), 7.33 (d,  $J = 8.0$  Hz, 2H), 7.23 (d,  $J = 5.6$  Hz, 2H), 7.07 (s, 2H), 6.96-6.90 (m, 4H), 6.68 (d,  $J = 8.4$  Hz, 2H), 6.57-6.50 (m, 6H), 5.82 (d,  $J = 16.0$  Hz, 2H), 4.05 (br, 8H), 3.98 (d,  $J = 5.2$  Hz, 4H), 3.90 (d,  $J = 5.2$  Hz, 4H), 3.65-3.43 (m, 224H), 3.29-3.27 (s $\times$  16  $OCH_3$ , 48H), 2.41-2.33 (m, 8H).  $^{13}C$  NMR (100 MHz,  $CDCl_3$ ):  $\delta$  186.5, 161.0, 155.9, 151.1, 150.4, 149.2, 149.1, 148.9, 144.4, 140.1, 133.7,

131.4, 130.0, 129.4, 127.4, 126.3, 121.2, 120.6, 117.6, 115.5, 114.5, 113.5, 113.0, 112.1, 77.5, 72.1, 72.0, 70.8, 70.8, 70.7, 70.6, 70.6, 69.5, 69.4, 67.3, 67.1, 59.1, 55.7, 40.3, 40.2. HRMS (MAIDL) calcd for  $C_{194}H_{325}BF_2N_2O_{75}Na [M+Na]^+$ , 3955.1633; found, 3955.1687.

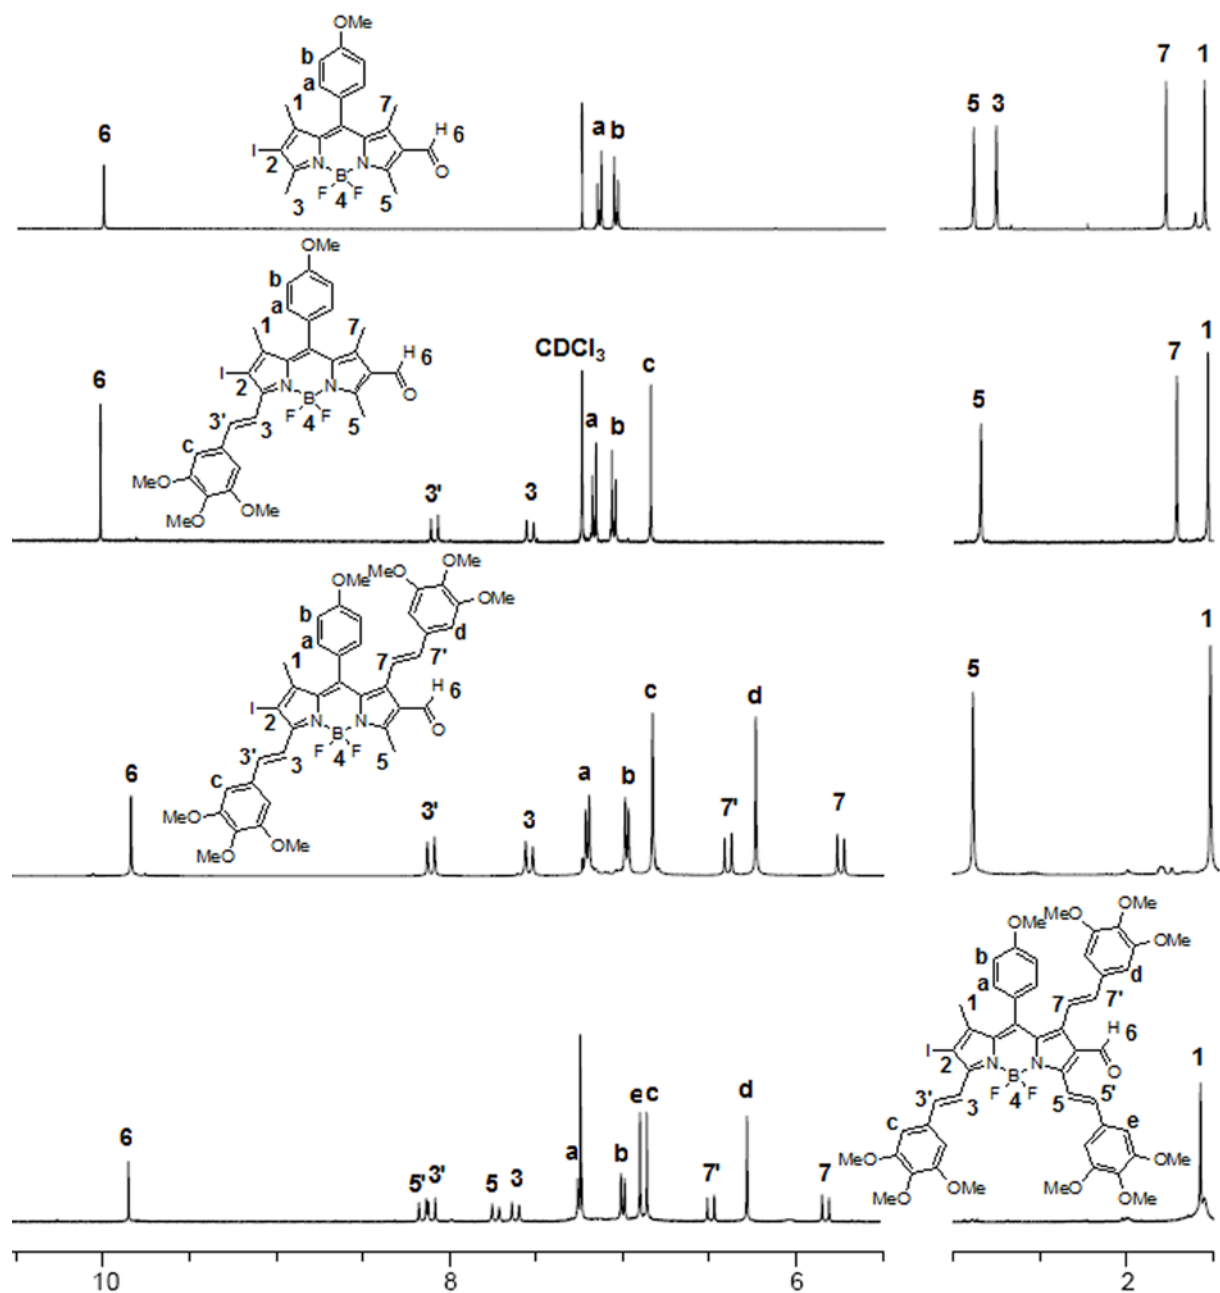

**Figure S1.** Comparison of  $^1\text{H}$  spectra of BODIPY dye 4, A, B and C

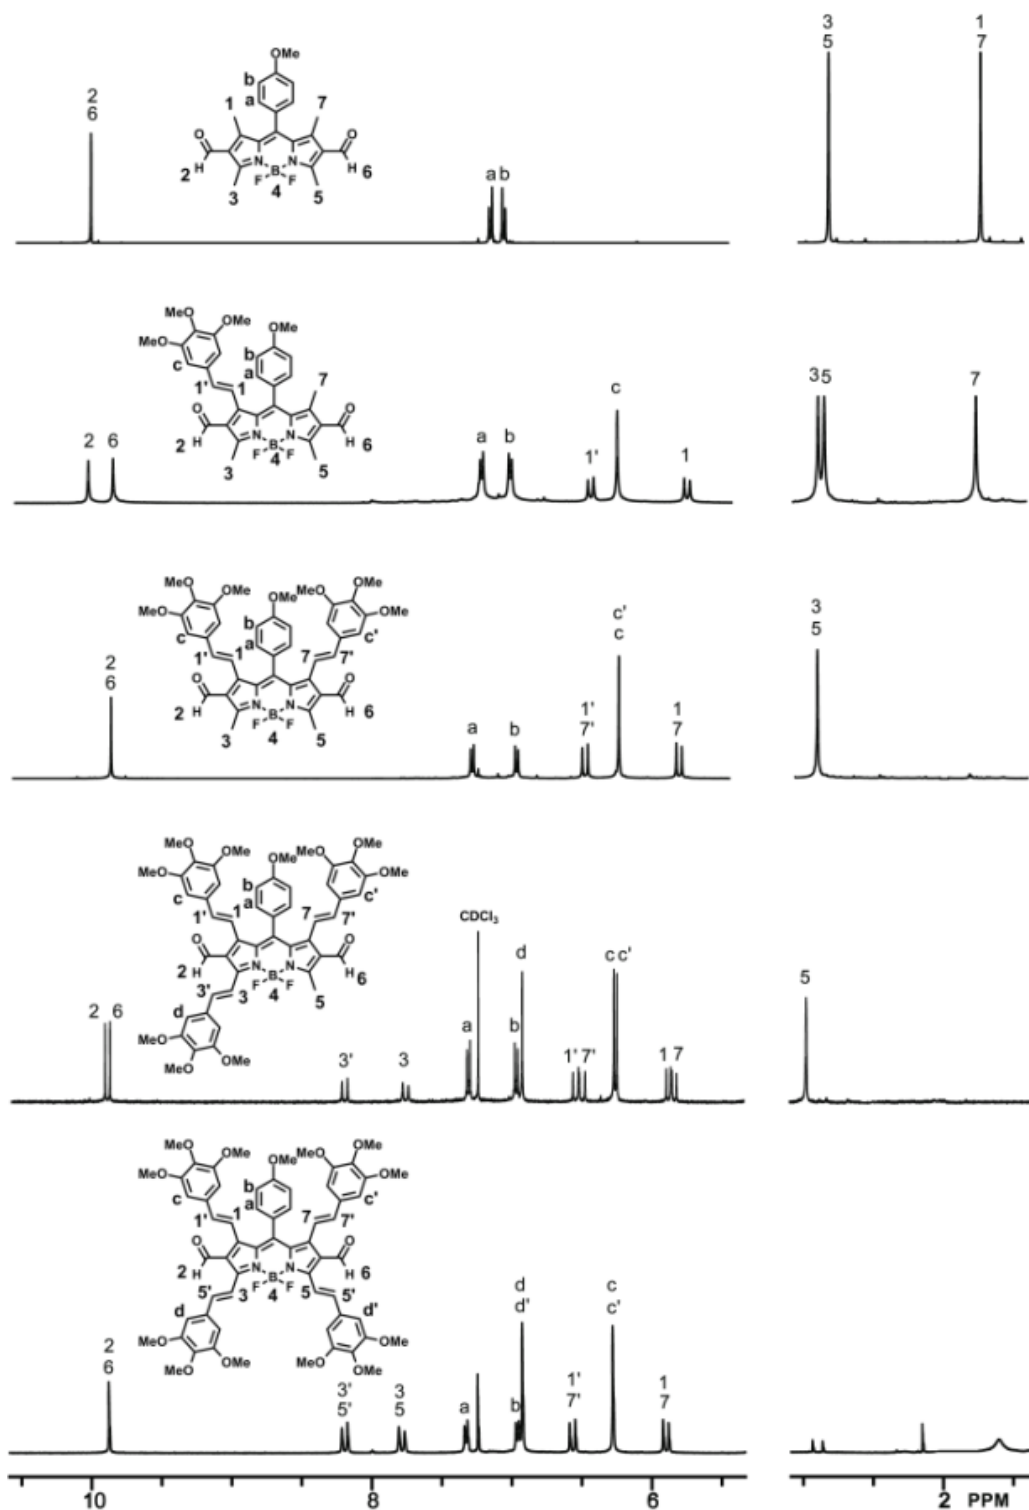

**Figure S2.**  $^1\text{H}$  NMR spectra (CDCl<sub>3</sub>, 400 MHz) of BODIPY dyes (**6**, **D<sub>a</sub>**, **E<sub>a</sub>**, **F<sub>a</sub>** and **G<sub>a</sub>** from the top to the bottom)

Formation of the first vinyl bond at the 1-position in BODIPY dye (**D<sub>a</sub>**) results in the disappearance of the methyl proton peak at 1.73 ppm for this 1-position, and, shifts the aldehyde proton peak at the 2-position to higher field by 0.16 ppm. The methyl proton resonance for the 3-position is shifted to lower field by 0.08 ppm, and the proton resonances corresponding to the a,b-positions of the meso phenyl ring separates from 0.09 ppm to 0.21 ppm. Formation of the second vinyl bond at the 7-position in BODIPY dye (**E<sub>a</sub>**) causes the disappearance of the corresponding methyl proton resonance at 1.73 ppm, and shifts the aldehyde proton resonance at the 6-position to higher field resulting in an overlap with that at the 2-position. Additionally, the methyl proton resonance at the 5-position shifts to lower field and overlaps with that from the 3-position. Formation of the third vinyl bond at the 3-position in BODIPY dye (**F<sub>a</sub>**) results in the disappearance of the corresponding methyl proton resonance at 2.90 ppm, and shifts the proton resonances at the 2- and 5-positions to lower fields by 0.05 and 0.08 ppm respectively. Formation of the fourth vinyl bond at 5-position in BODIPY dye (**F<sub>a</sub>**) causes the disappearance of the corresponding methyl proton resonance at 2.90 ppm, and results in an overlap in the aldehyde proton resonances at the 2,6-positions (Figure 2).

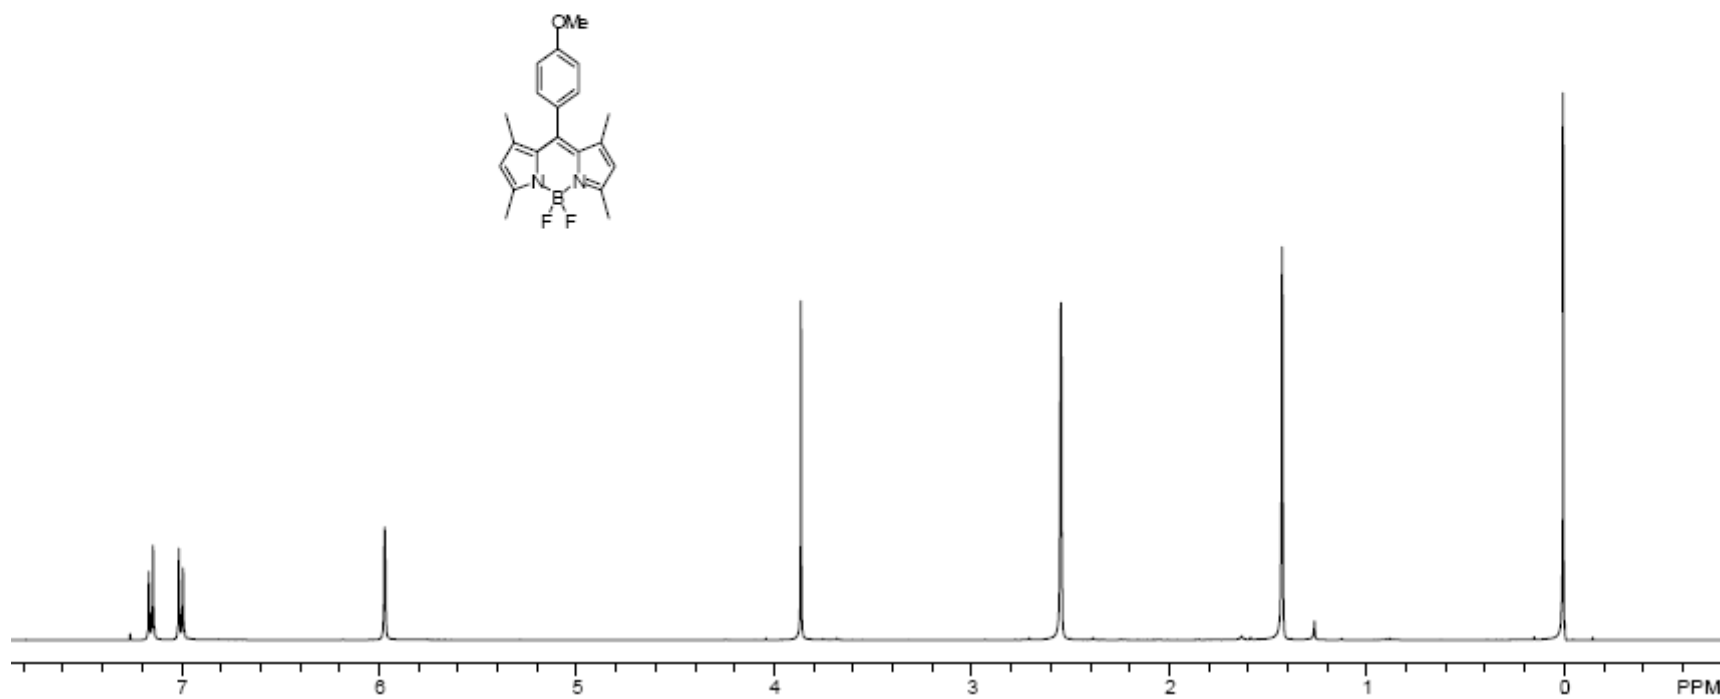

**Figure S3.** <sup>1</sup>H NMR spectrum of BODIPY dye **2** in CDCl<sub>3</sub> solution.

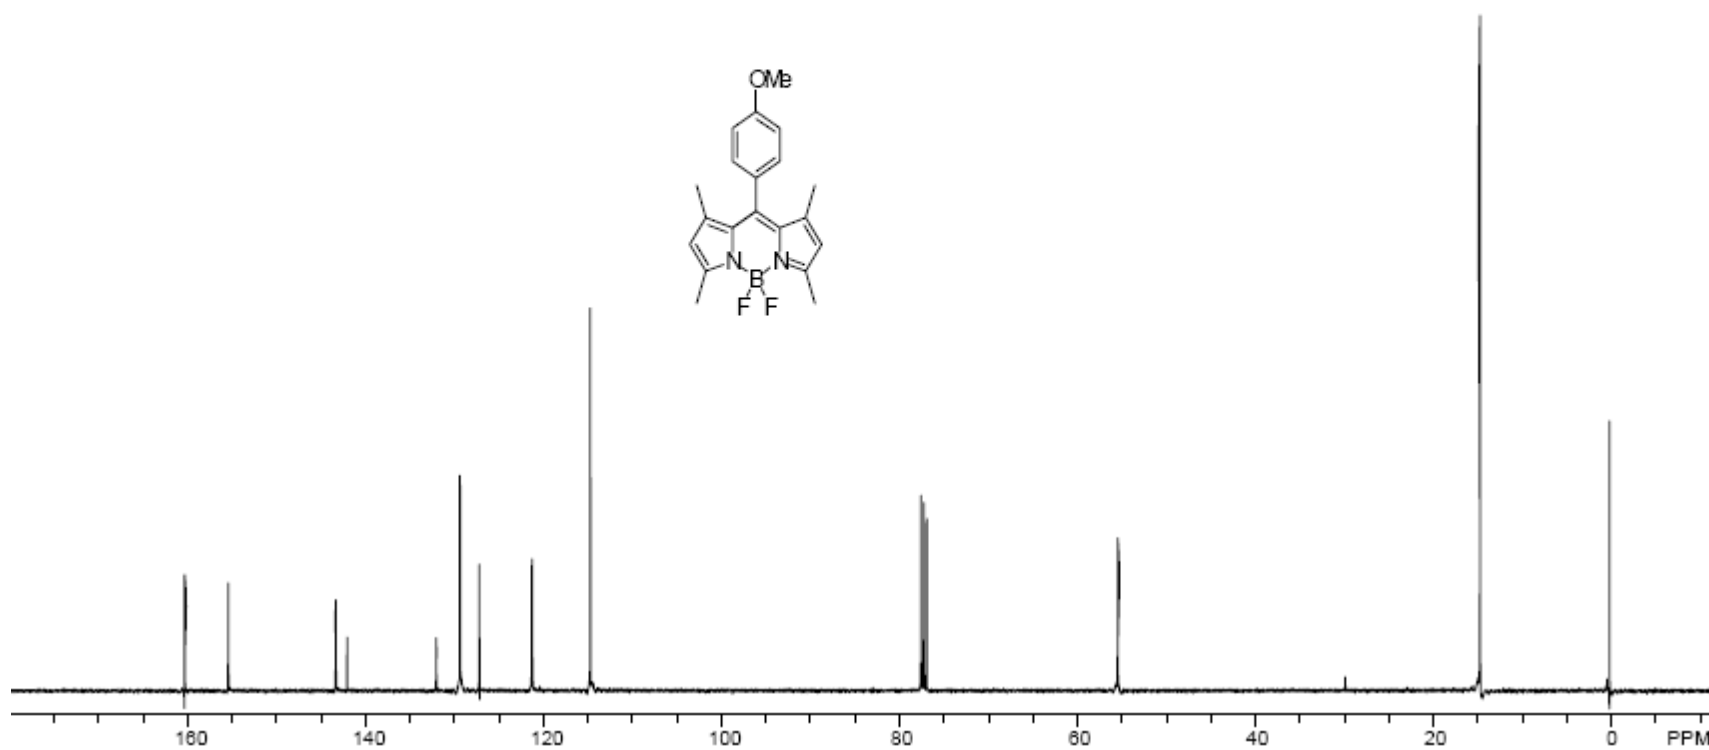

**Figure S4.**  $^{13}\text{C}$  NMR spectrum of BODIPY dye **2** in  $\text{CDCl}_3$  solution.



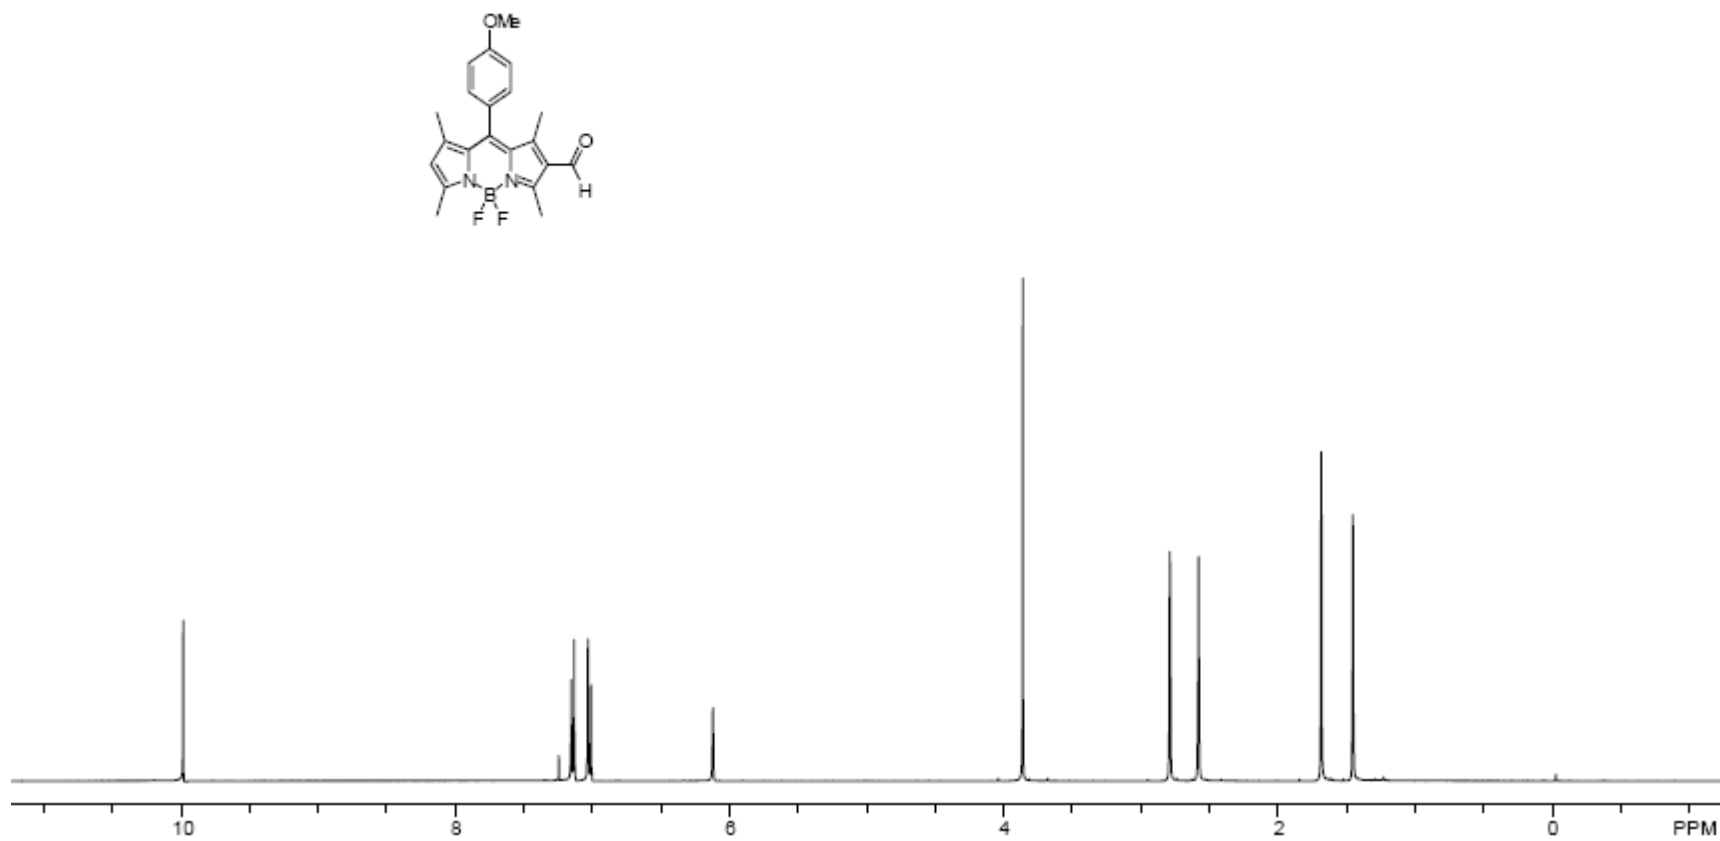

**Figure S5.** <sup>1</sup>H NMR spectrum of BODIPY dye **3** in CDCl<sub>3</sub> solution.

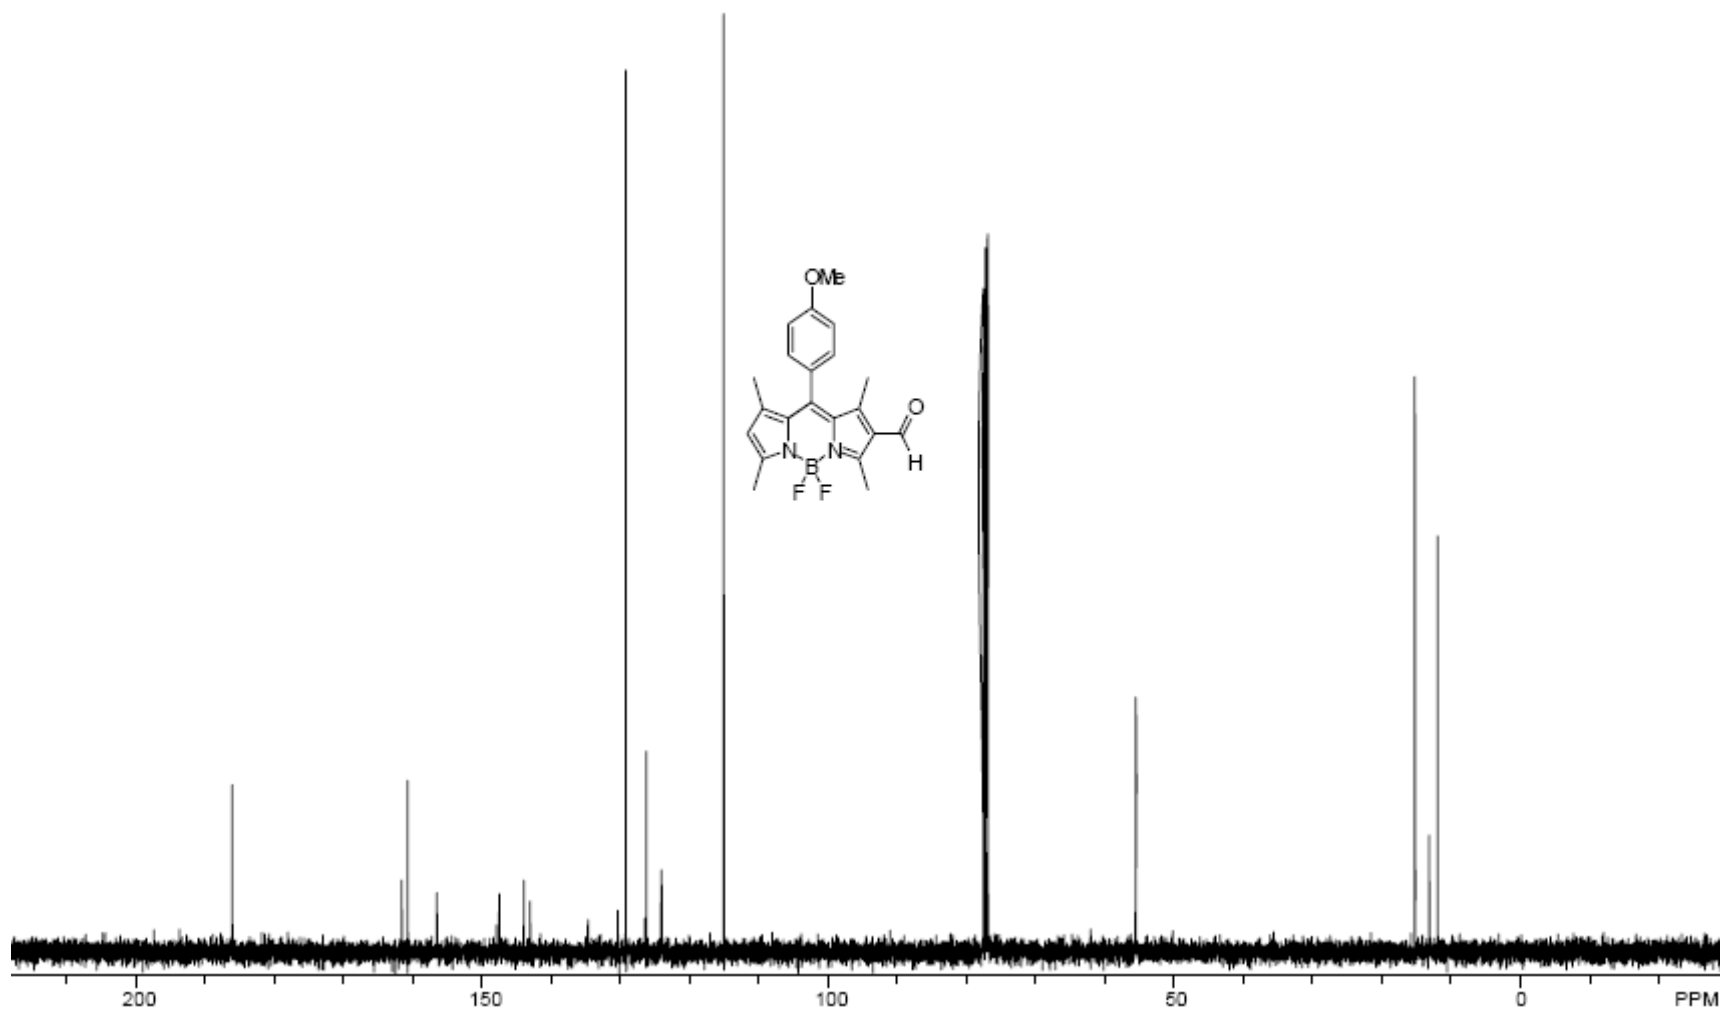

**Figure S6.**  $^{13}\text{C}$  NMR spectrum of BODIPY dye **3** in  $\text{CDCl}_3$  solution.

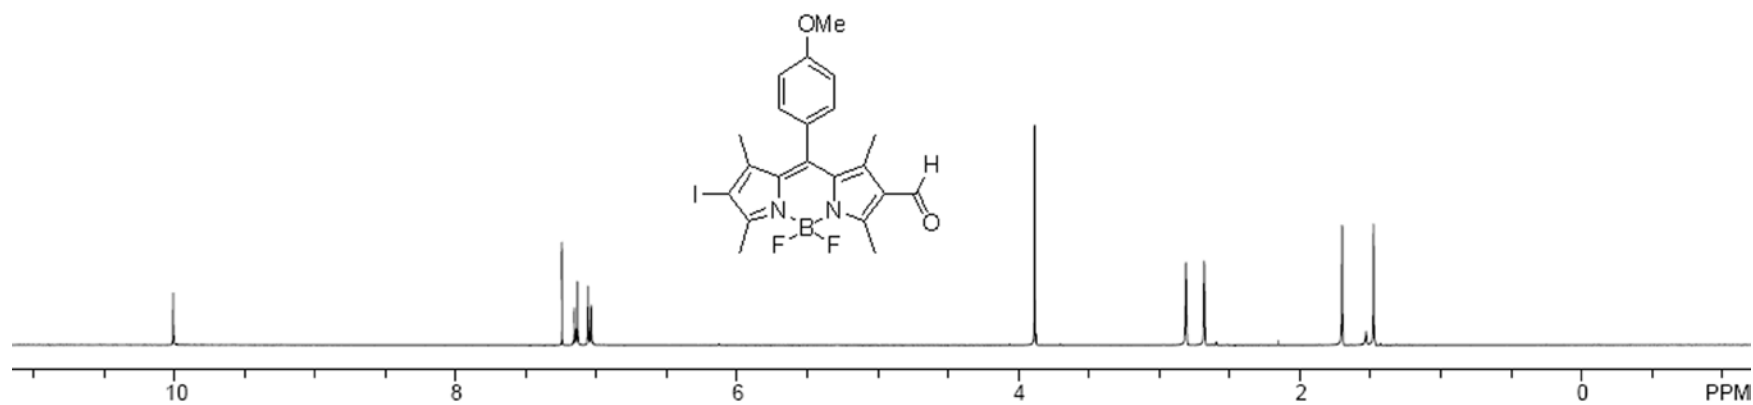

**Figure S7.** <sup>1</sup>H NMR spectrum of BODIPY dye **4** in CDCl<sub>3</sub> solution.

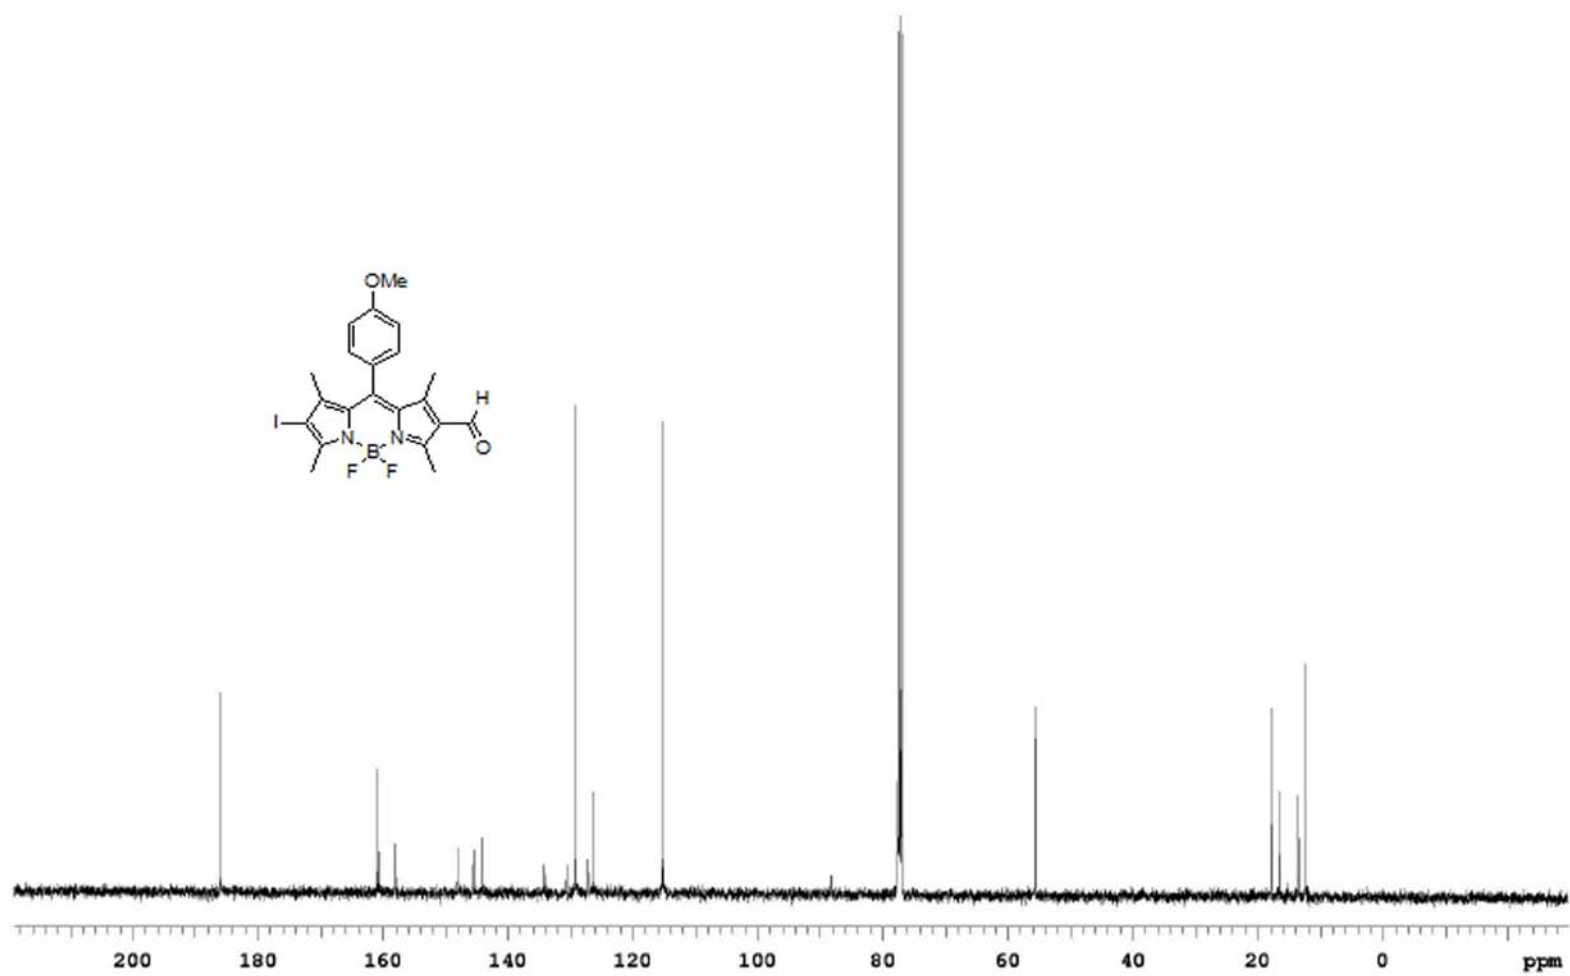

**Figure S8.**  $^{13}\text{C}$  NMR spectrum of BODIPY dye 4 in  $\text{CDCl}_3$  solution.

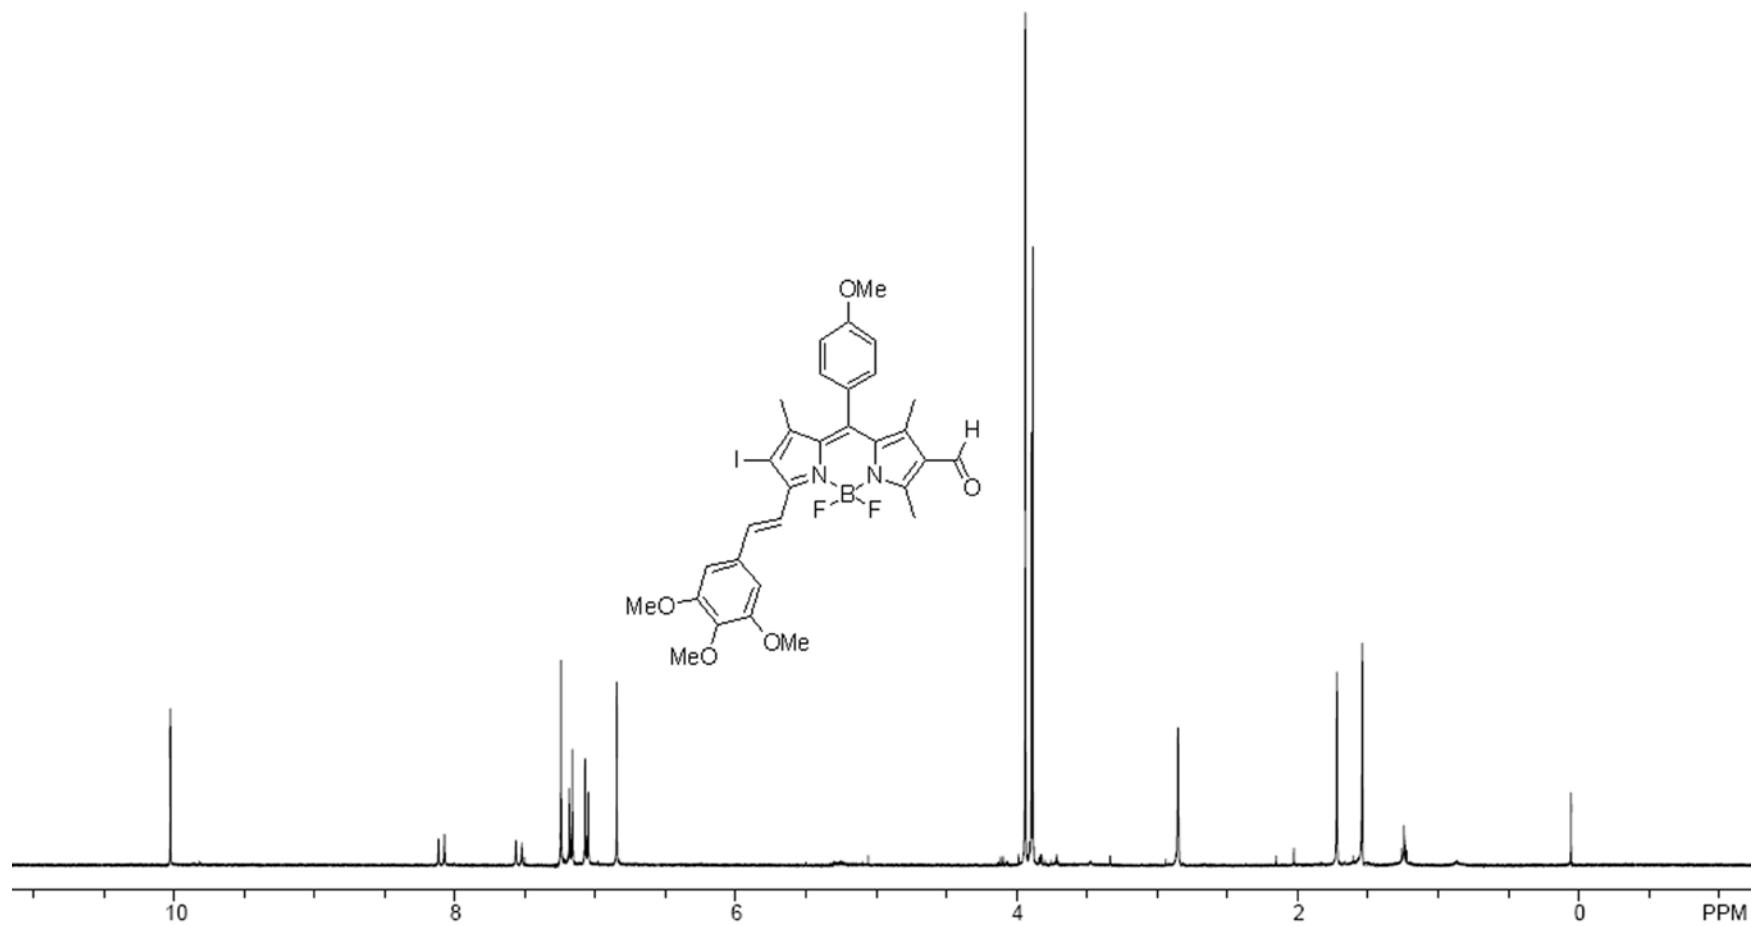

**Figure S9.**  $^1\text{H}$  NMR spectrum of BODIPY dye A in  $\text{CDCl}_3$  solution.

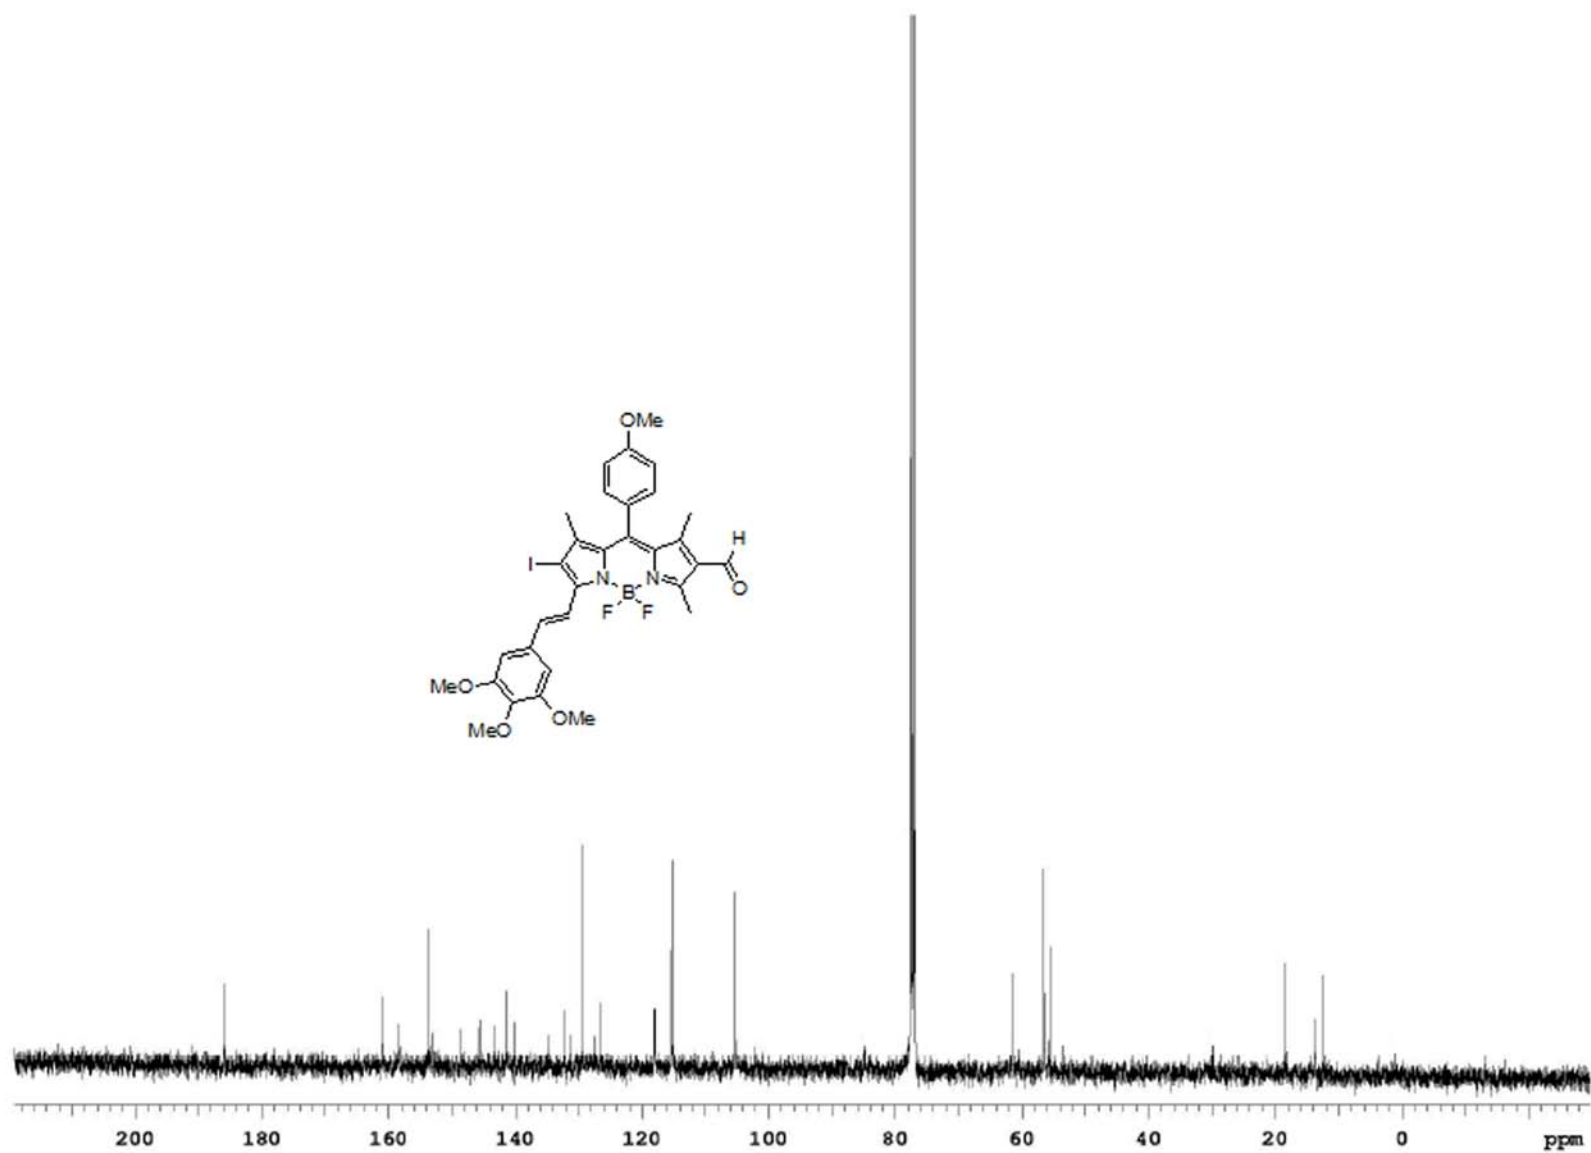

**Figure S10.**  $^{13}\text{C}$  NMR spectrum of BODIPY dye A in  $\text{CDCl}_3$  solution.

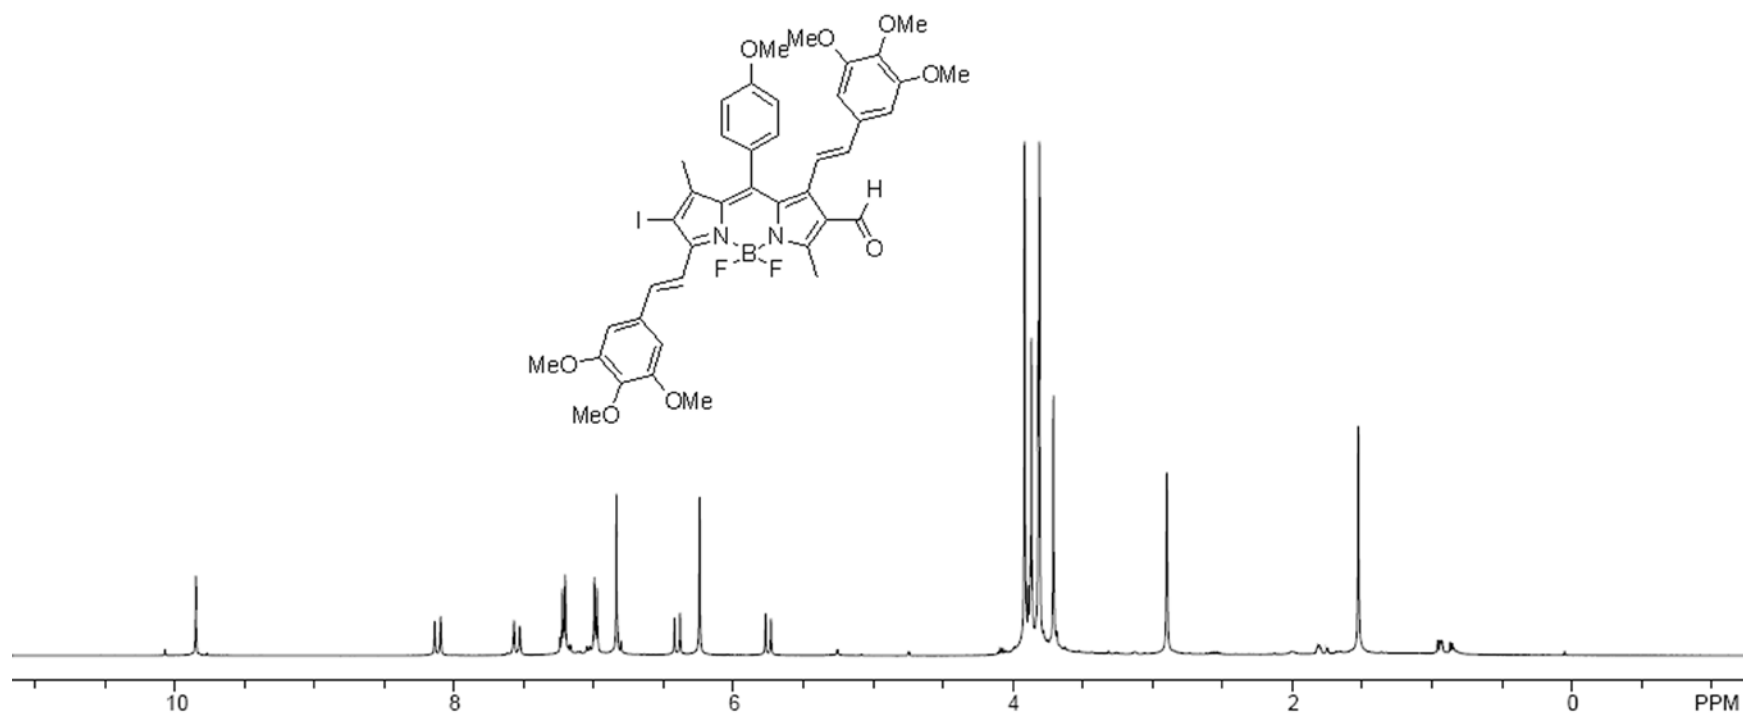

**Figure S11.** <sup>1</sup>H NMR spectrum of BODIPY dye **B** in CDCl<sub>3</sub> solution.

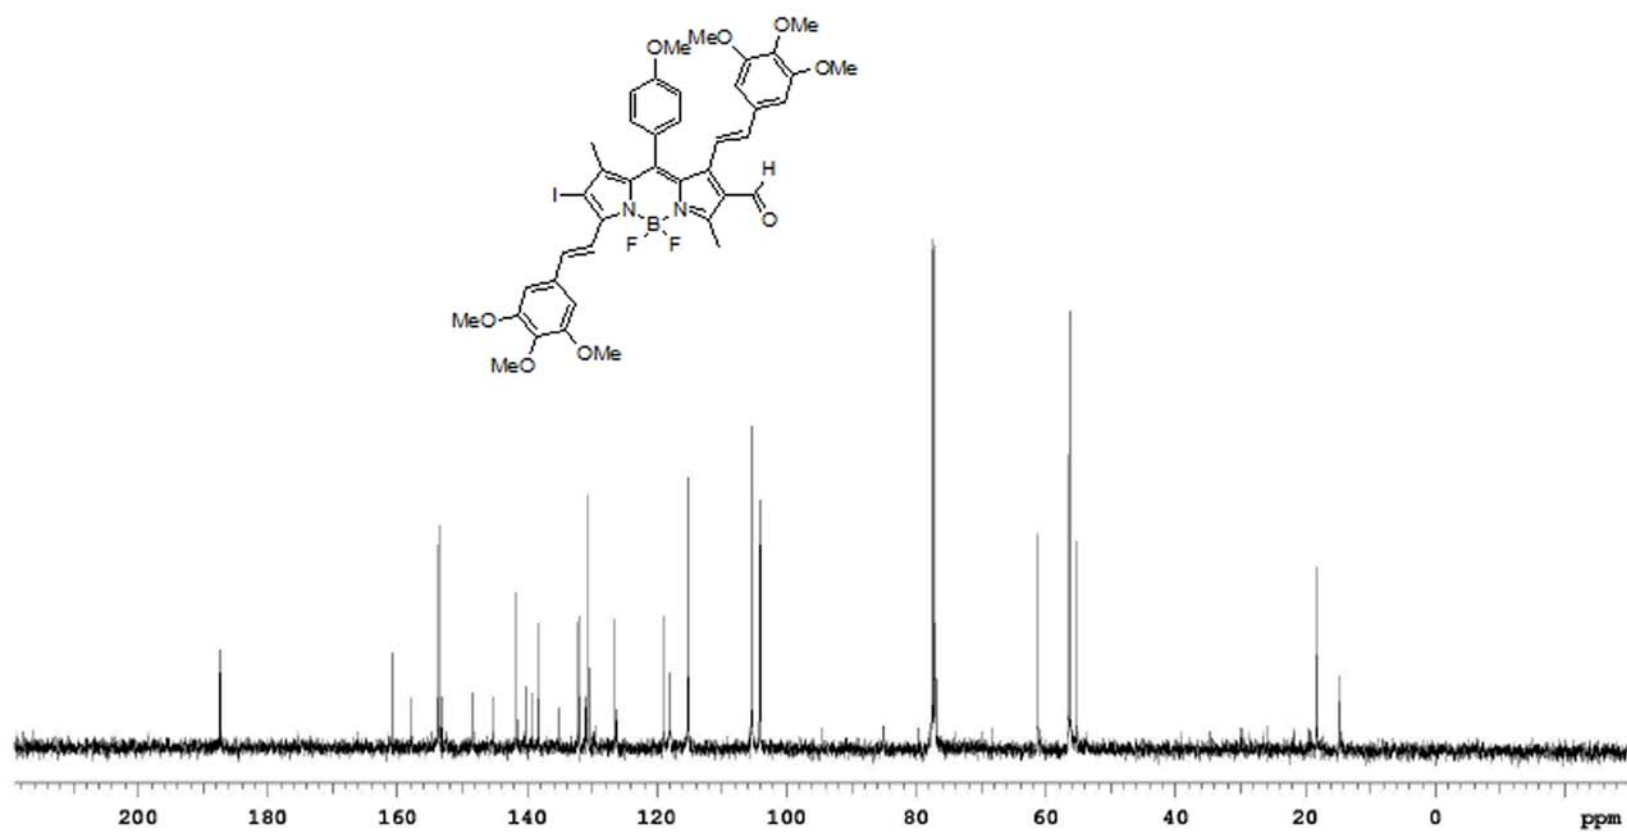

**Figure S12.**  $^{13}\text{C}$  NMR spectrum of BODIPY dye **B** in  $\text{CDCl}_3$  solution.



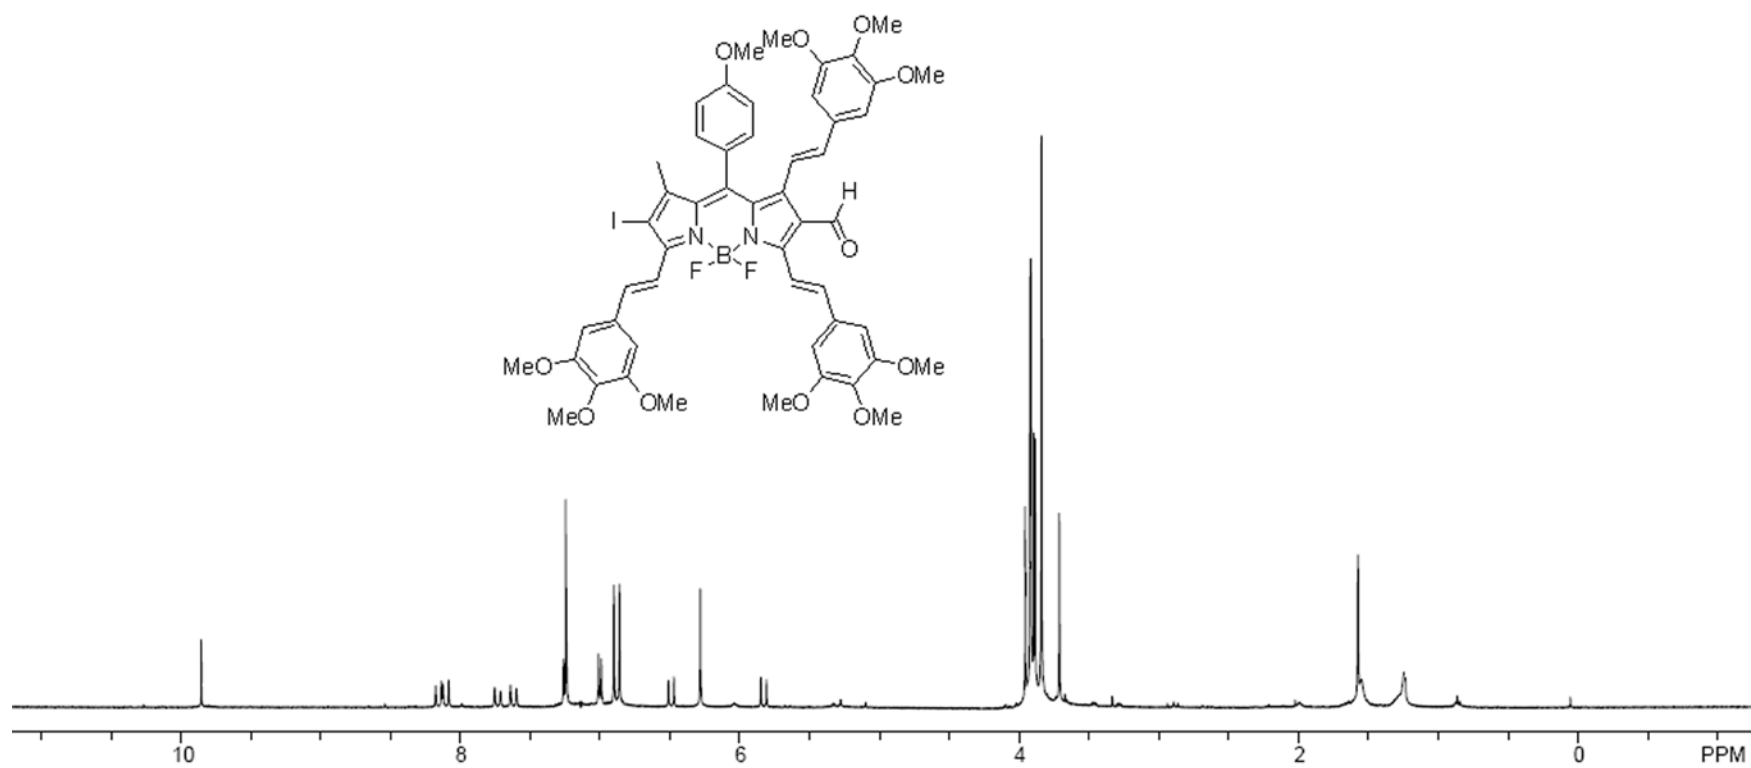

**Figure S13.** <sup>1</sup>H NMR spectrum of BODIPY dye C in CDCl<sub>3</sub> solution.

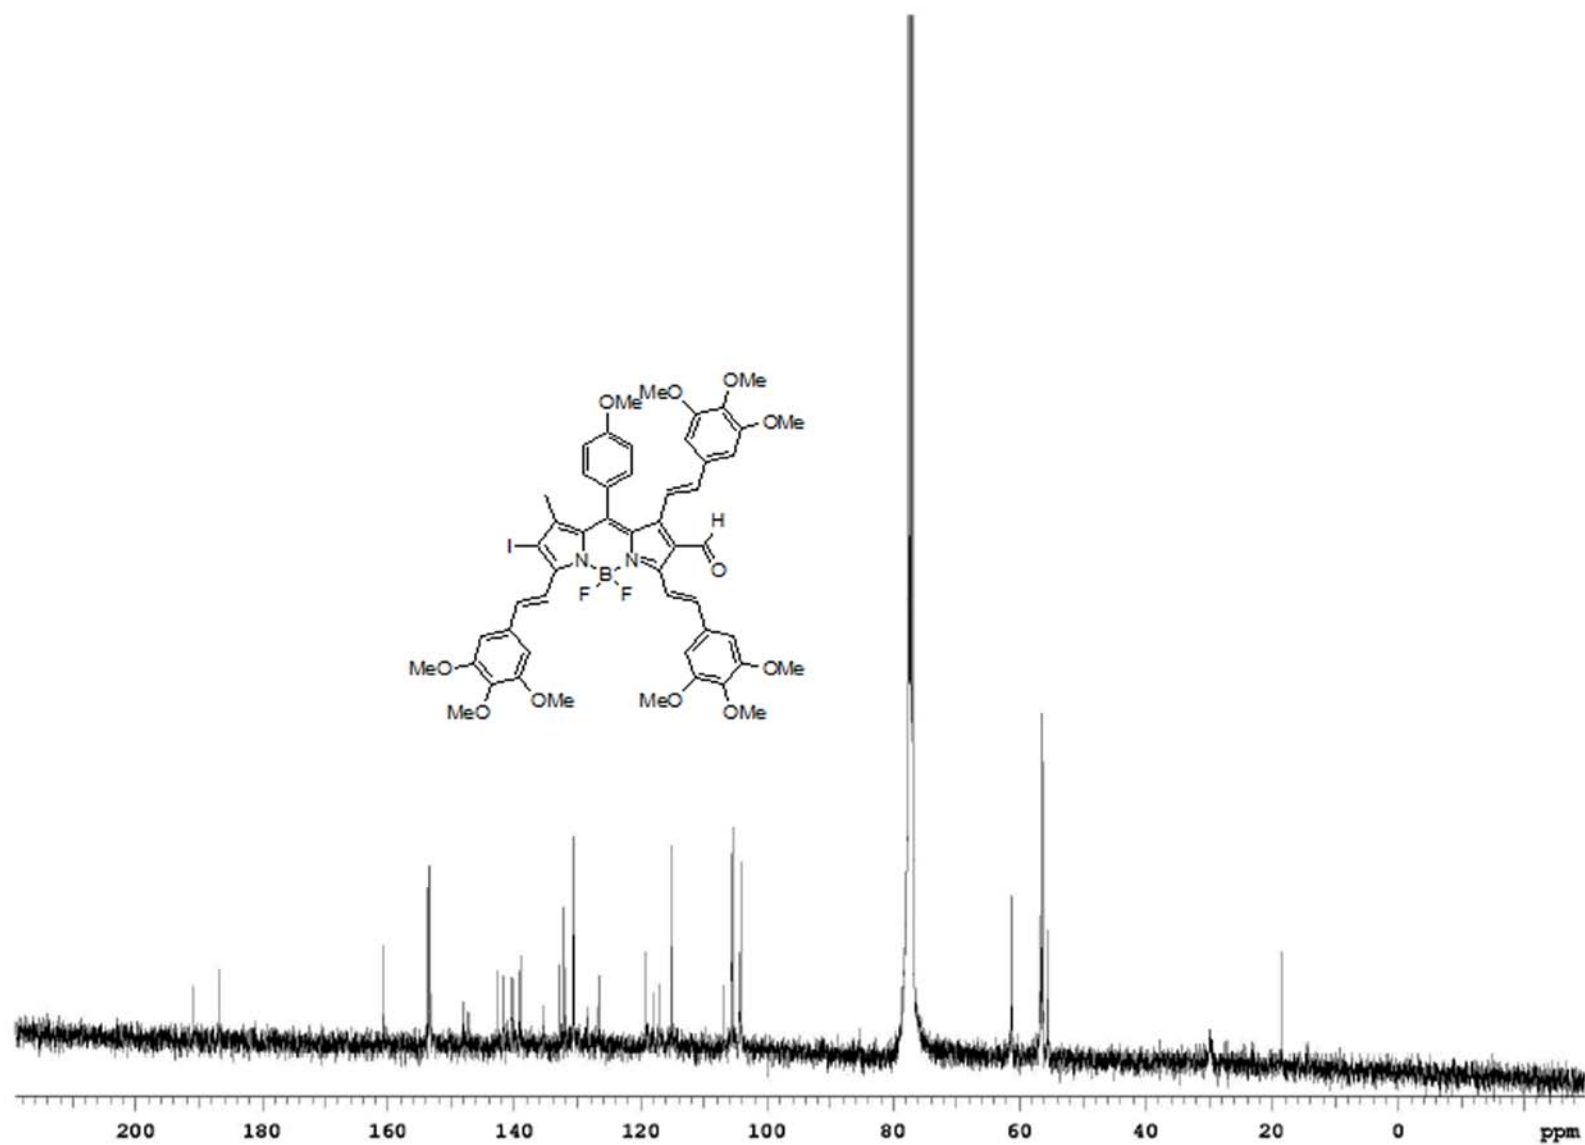

**Figure S14.** <sup>13</sup>C NMR spectrum of BODIPY dye C in CDCl<sub>3</sub> solution.

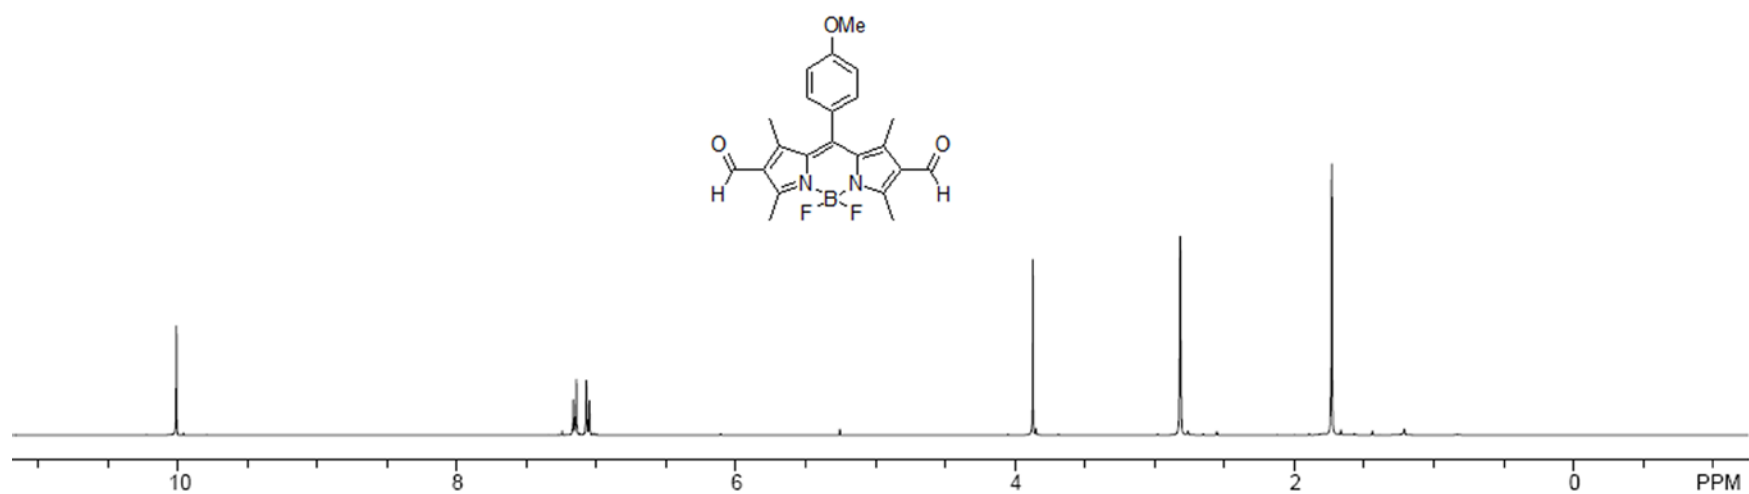

**Figure S15.** <sup>1</sup>H NMR spectrum of BODIPY dye **6** in CDCl<sub>3</sub> solution.

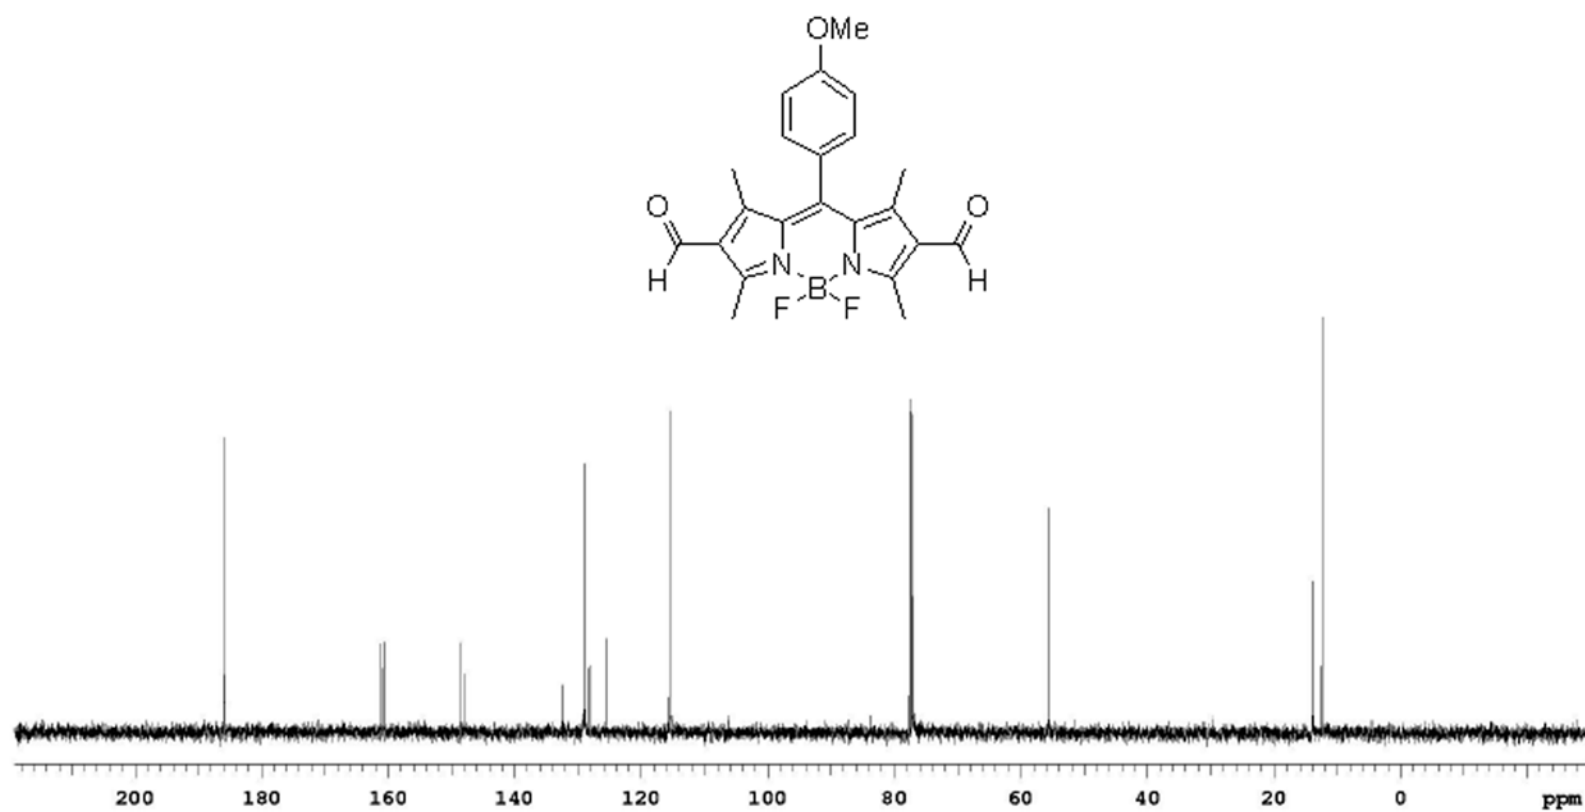

Figure S16.  $^{13}\text{C}$  NMR spectrum of BODIPY dye 6 in CDCl<sub>3</sub> solution.

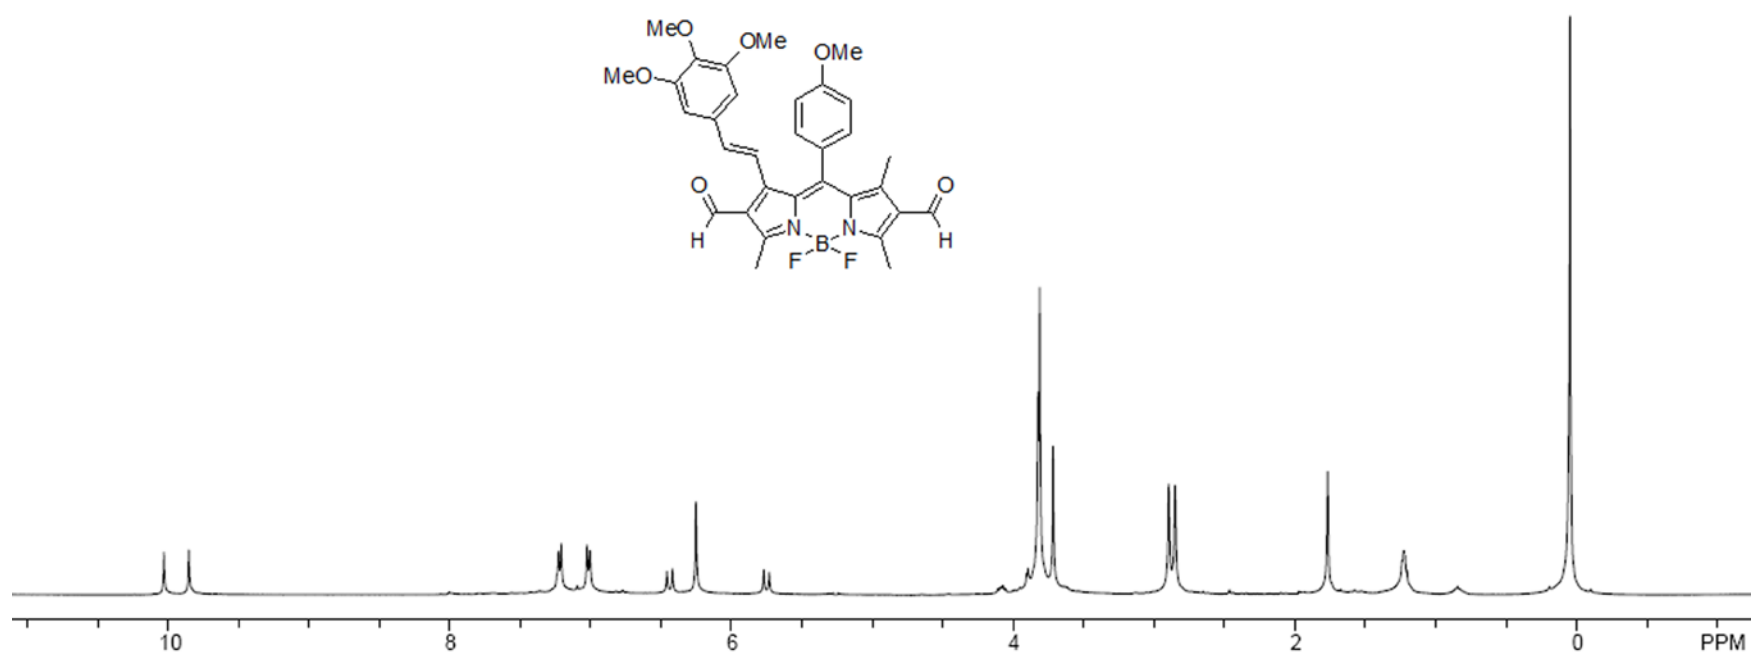

**Figure S17.** <sup>1</sup>H NMR spectrum of BODIPY dye **D<sub>a</sub>** in CDCl<sub>3</sub> solution.

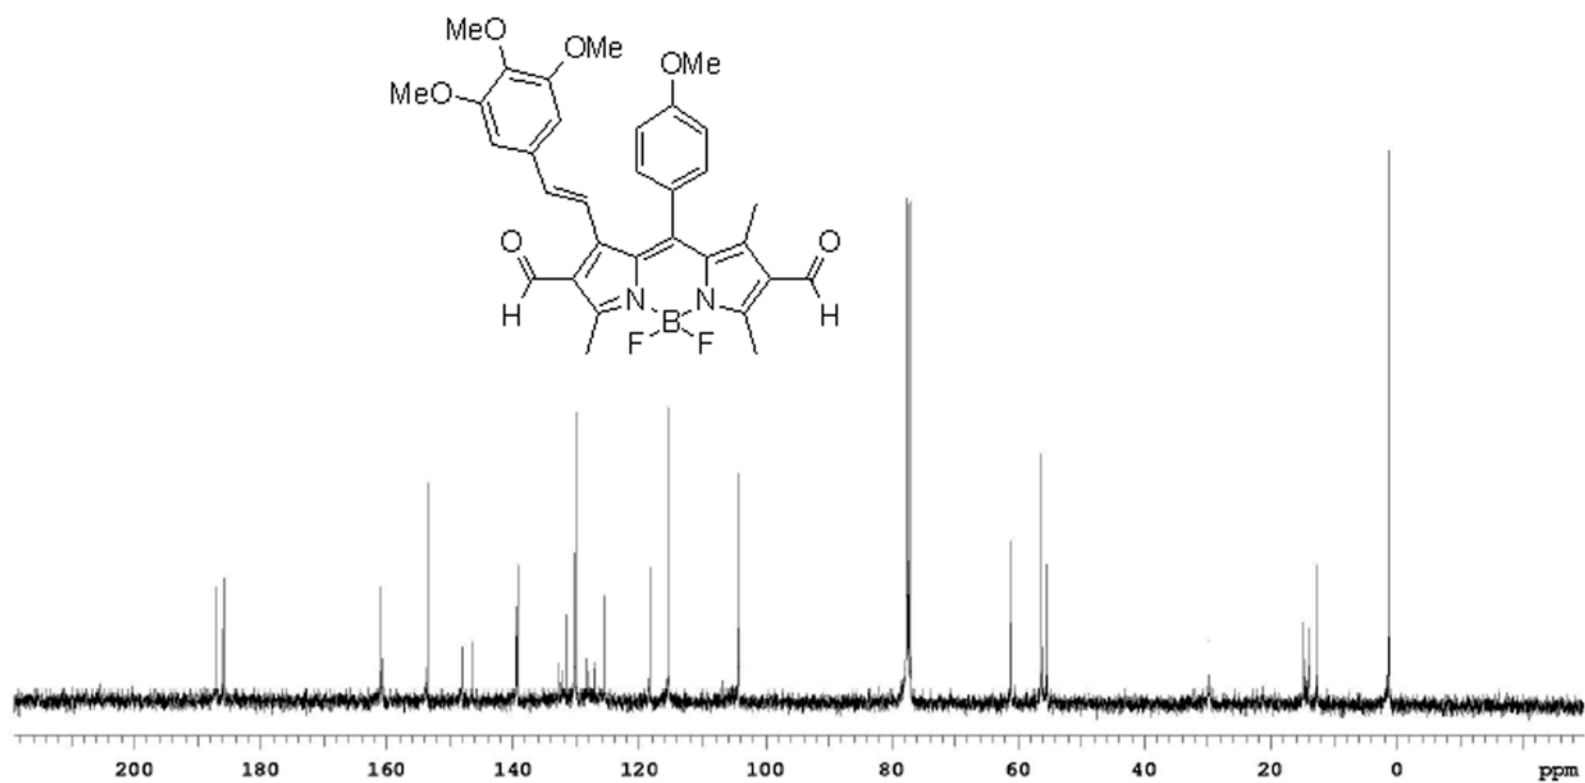

**Figure S18.** <sup>13</sup>C NMR spectrum of BODIPY dye **D<sub>a</sub>** in CDCl<sub>3</sub> solution.

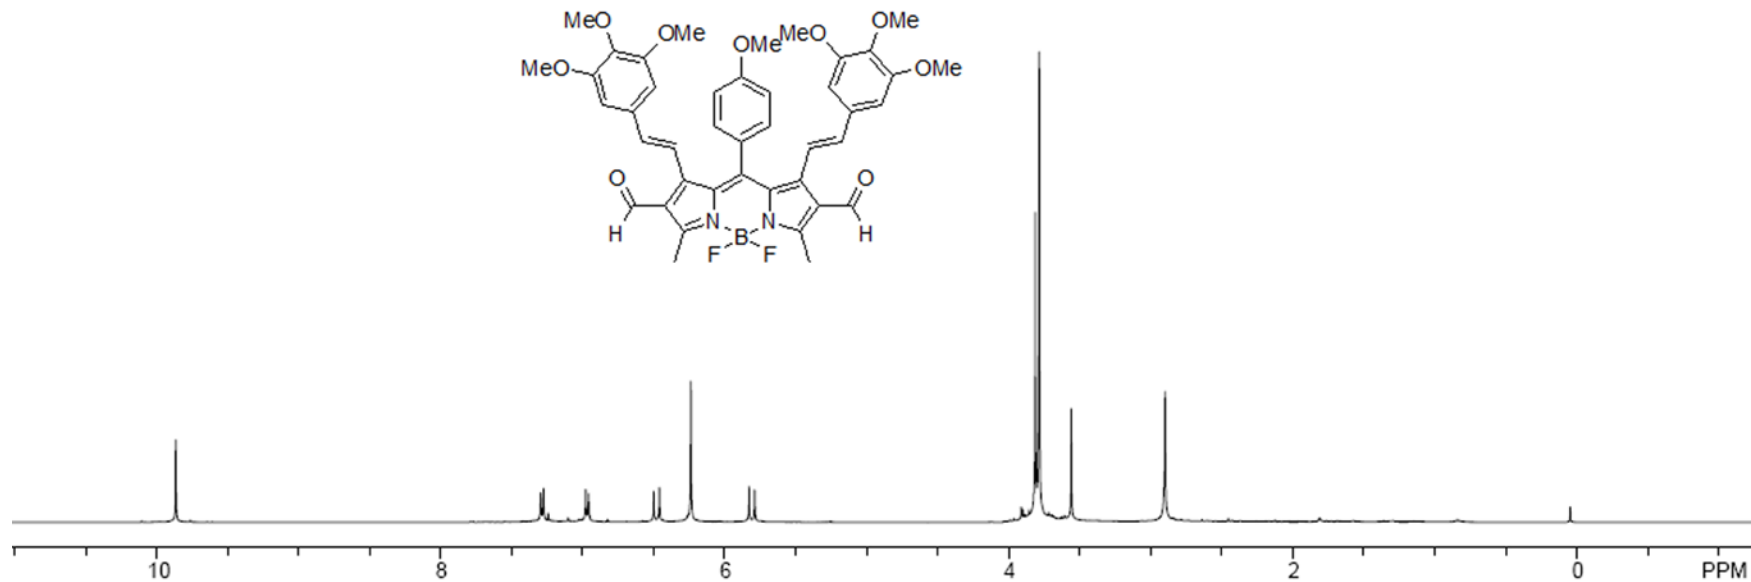

**Figure S19.** <sup>1</sup>H NMR spectrum of BODIPY dye **E<sub>a</sub>** in CDCl<sub>3</sub> solution.

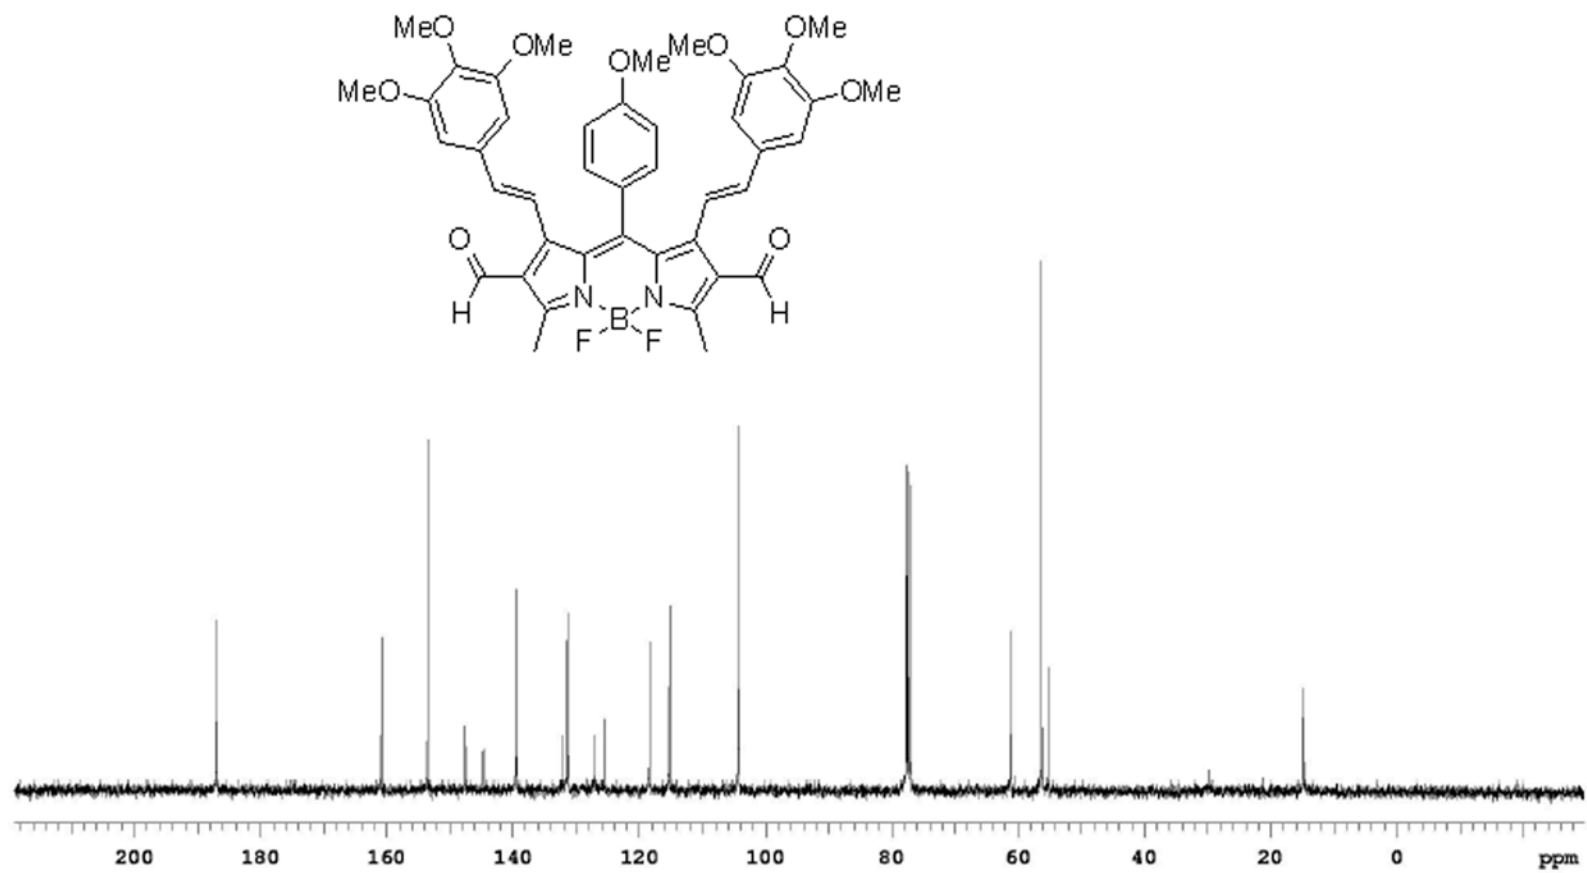

**Figure S20.** <sup>13</sup>C NMR spectrum of BODIPY dye **E<sub>a</sub>** in CDCl<sub>3</sub> solution.



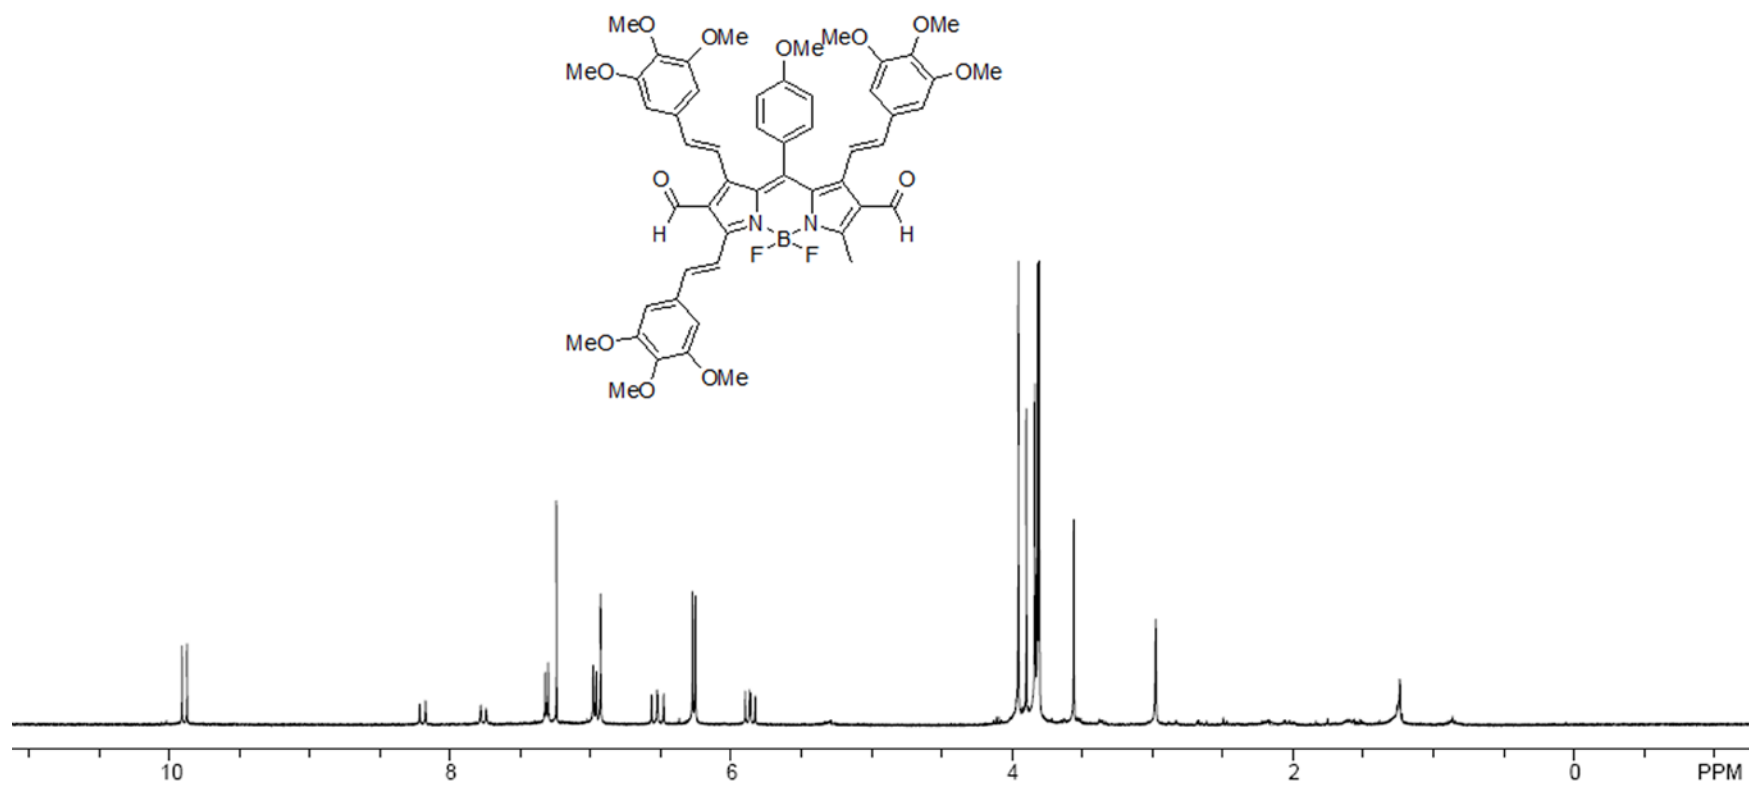

**Figure S21.** <sup>1</sup>H NMR spectrum of BODIPY dye **F<sub>a</sub>** in CDCl<sub>3</sub> solution.

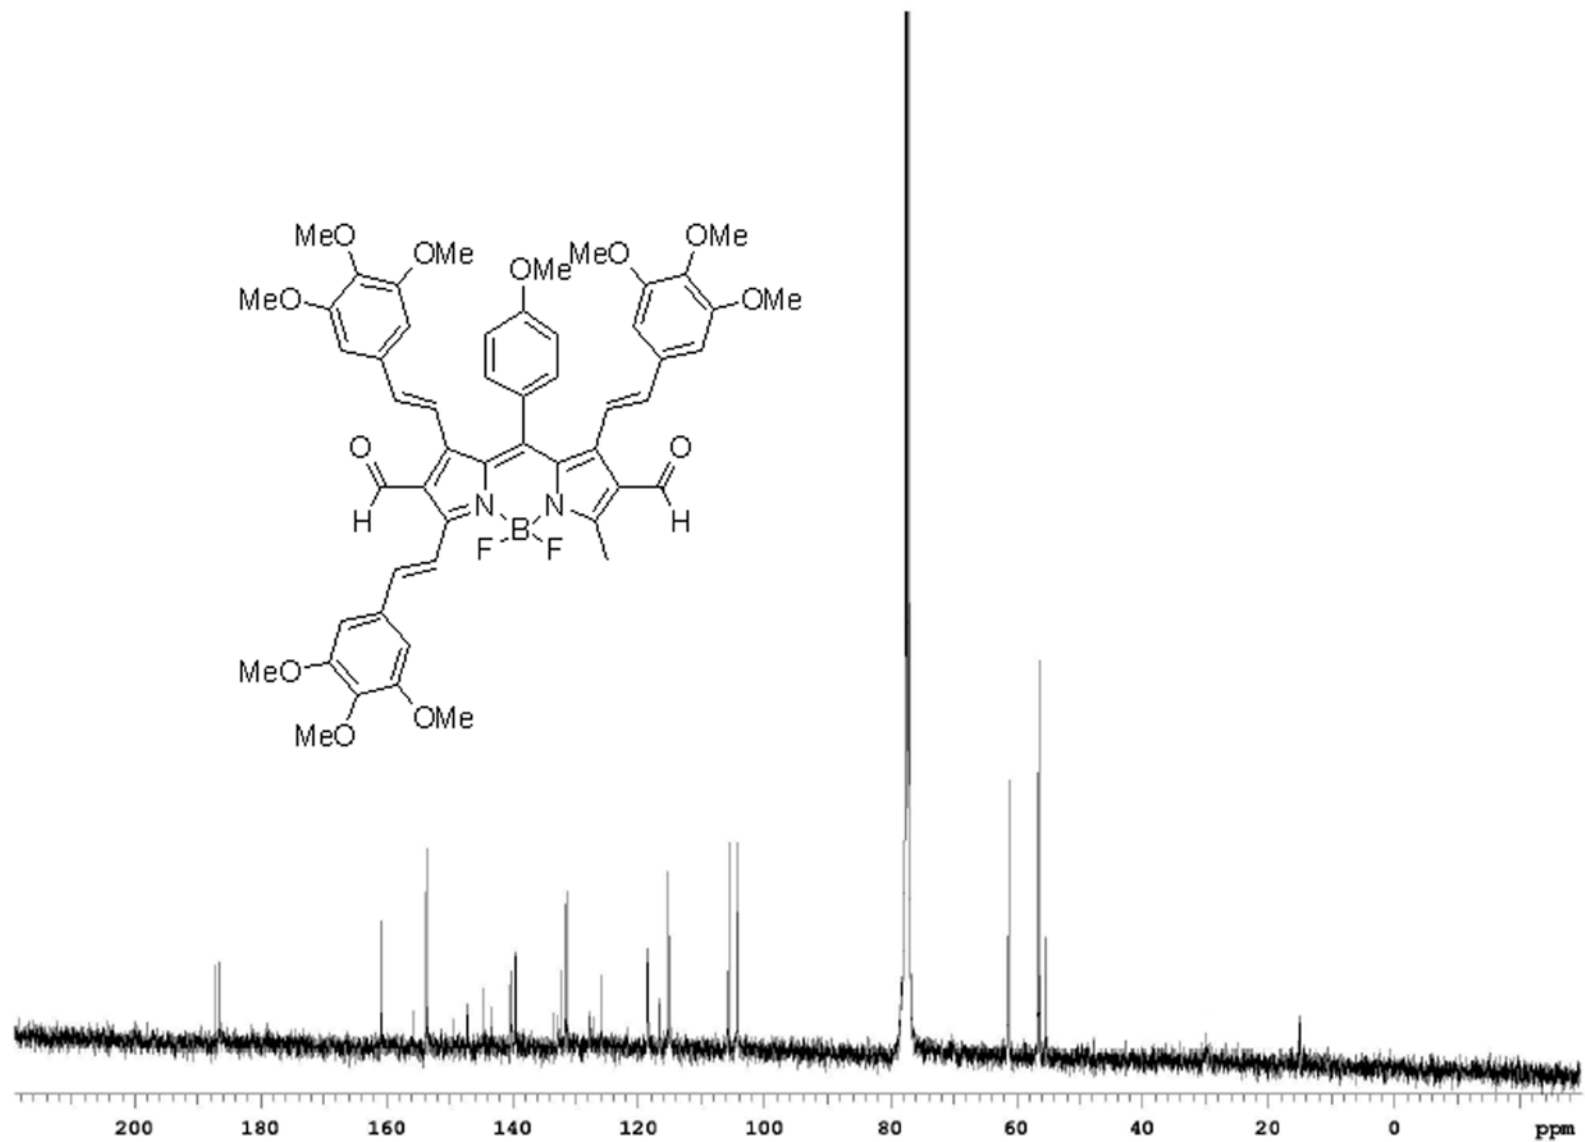

**Figure S22.** <sup>13</sup>C NMR spectrum of BODIPY dye **F<sub>a</sub>** in CDCl<sub>3</sub> solution.

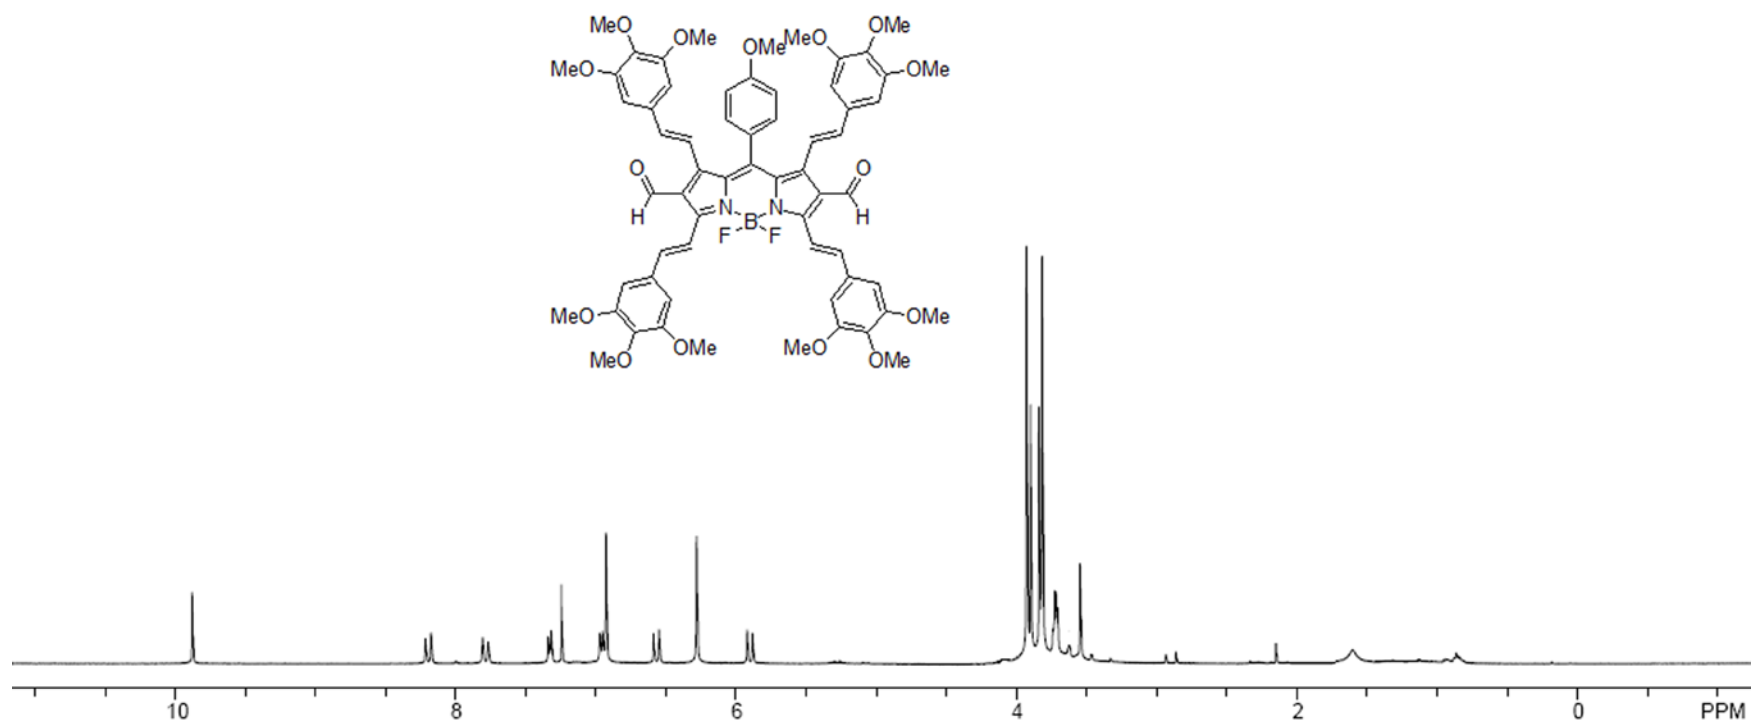

**Figure S23.** <sup>1</sup>H NMR spectrum of BODIPY dye **G<sub>a</sub>** in CDCl<sub>3</sub> solution.

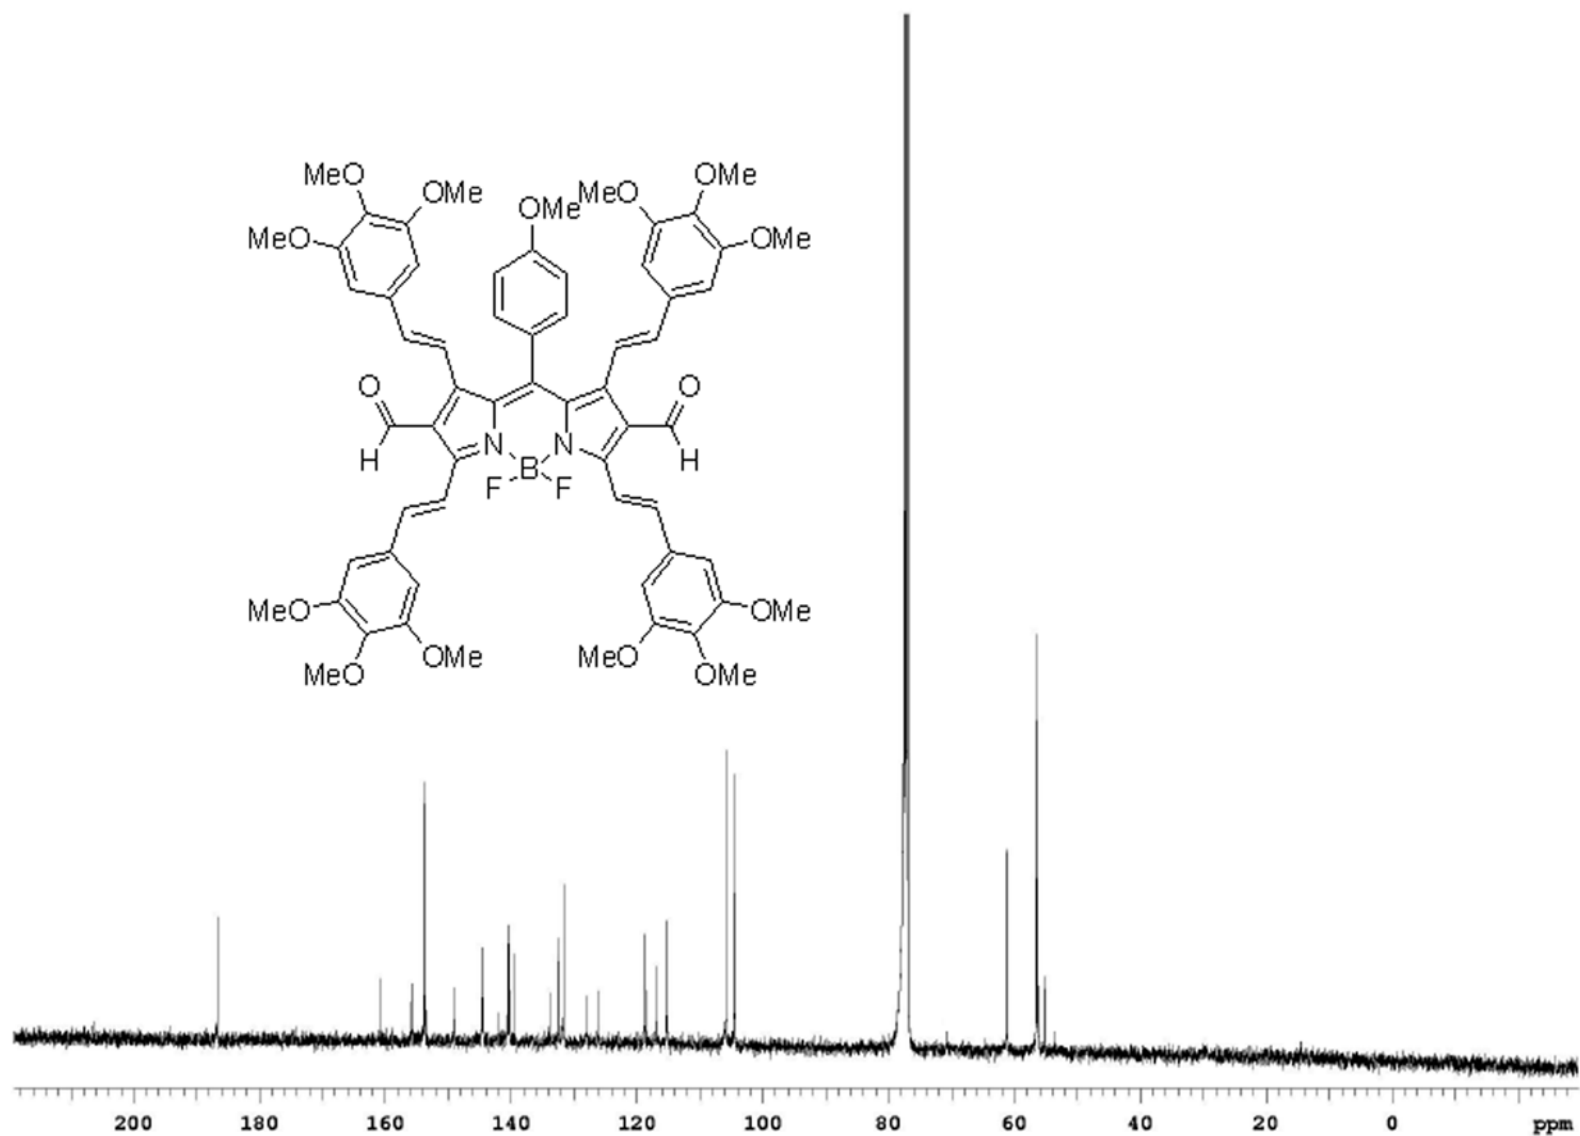

**Figure S24.** <sup>13</sup>C NMR spectrum of BODIPY dye **G<sub>a</sub>** in CDCl<sub>3</sub> solution.

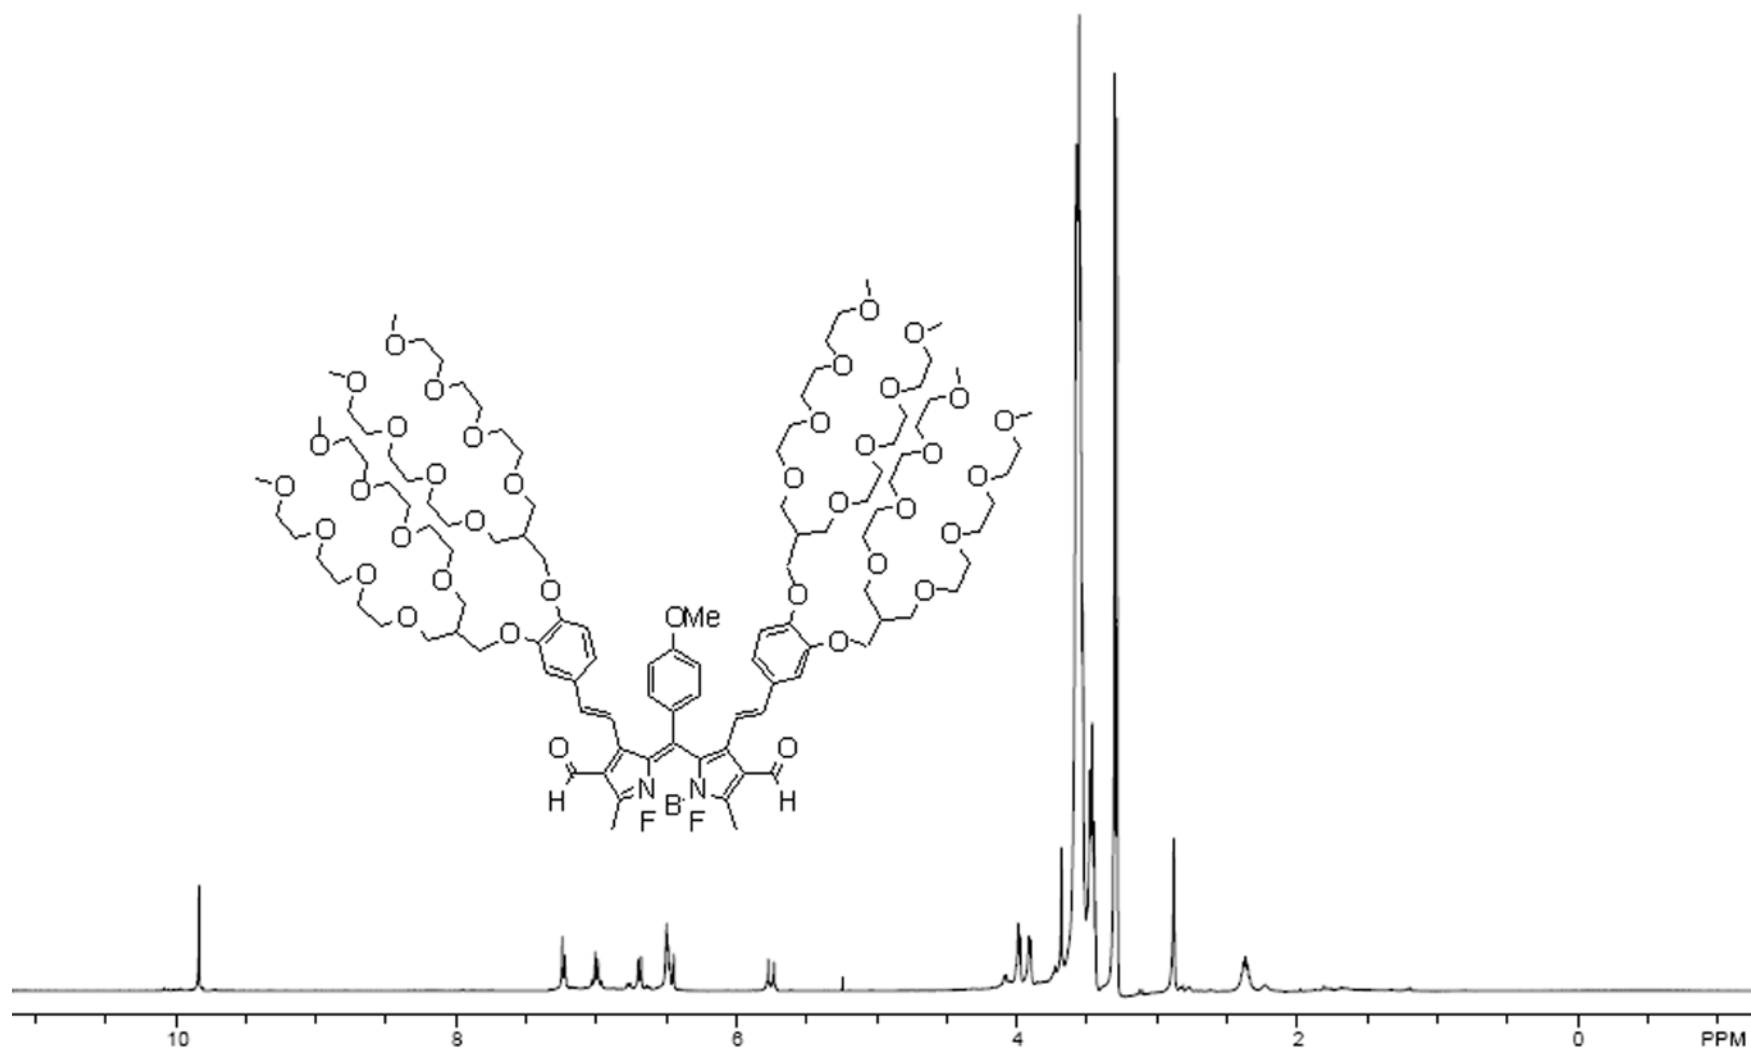

**Figure S25.**  $^1\text{H}$  NMR spectrum of BODIPY dye **D<sub>b</sub>** in  $\text{CDCl}_3$  solution.

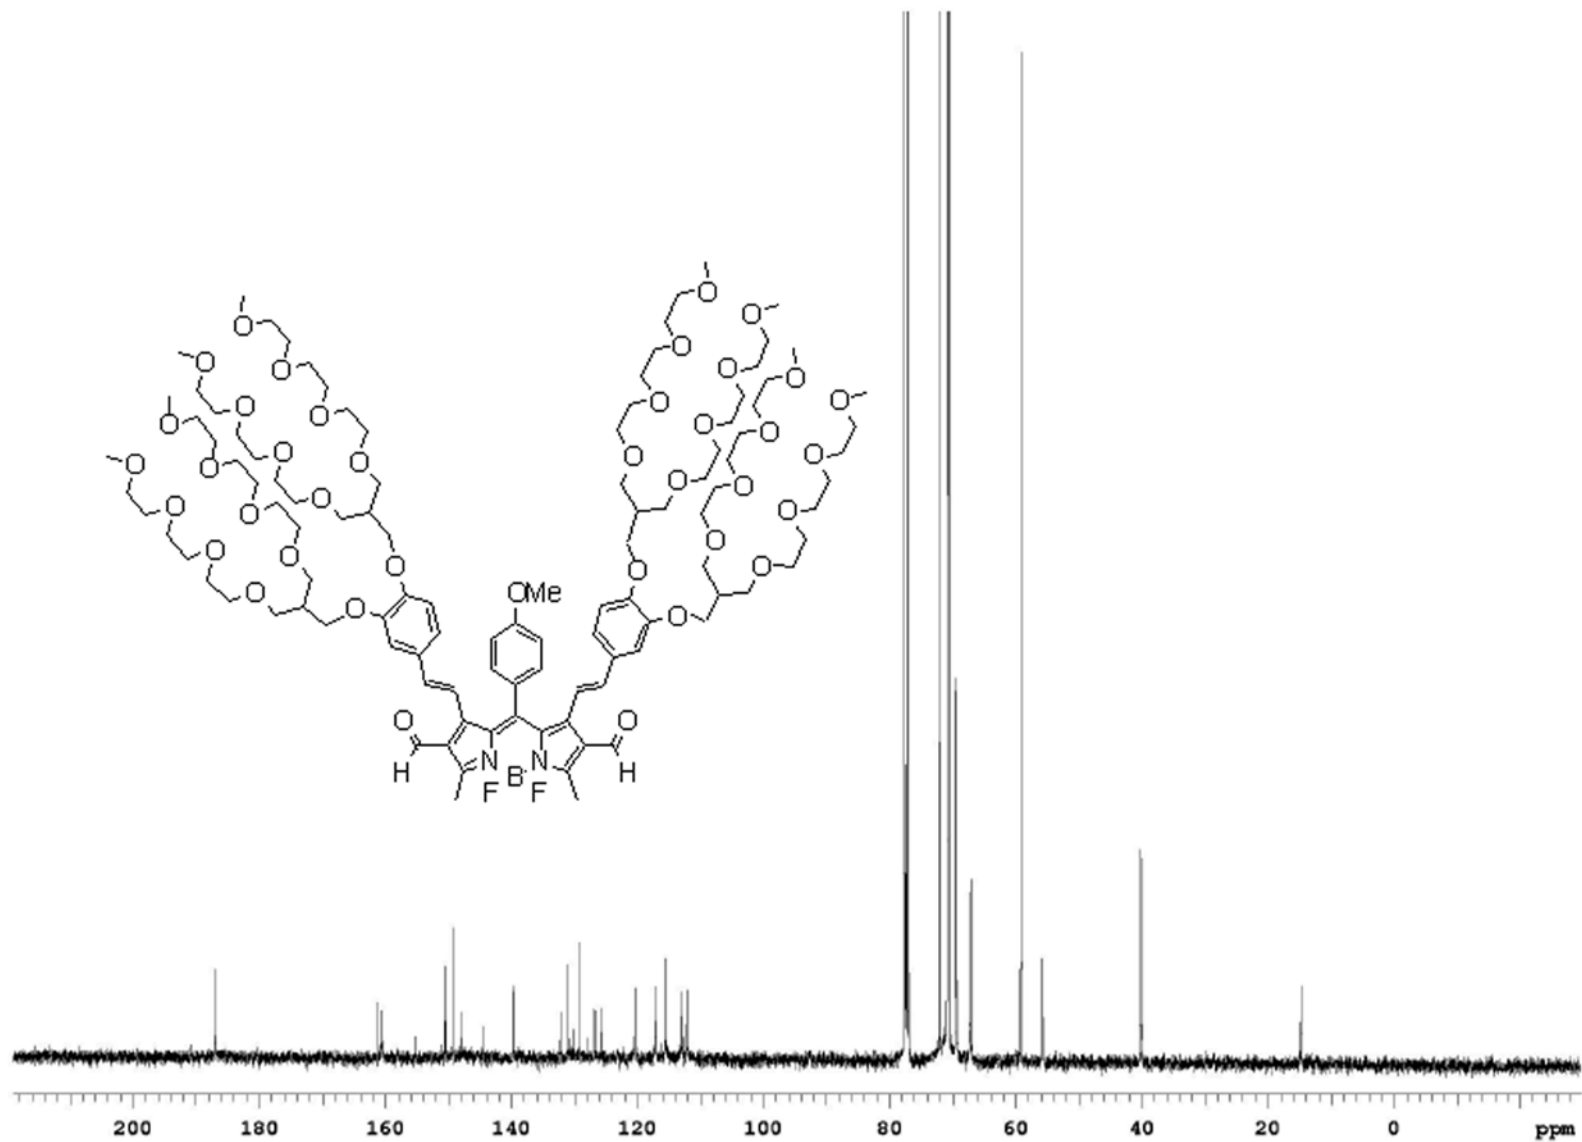

**Figure S26.**  $^{13}\text{C}$  NMR spectrum of BODIPY dye **D<sub>b</sub>** in  $\text{CDCl}_3$  solution.

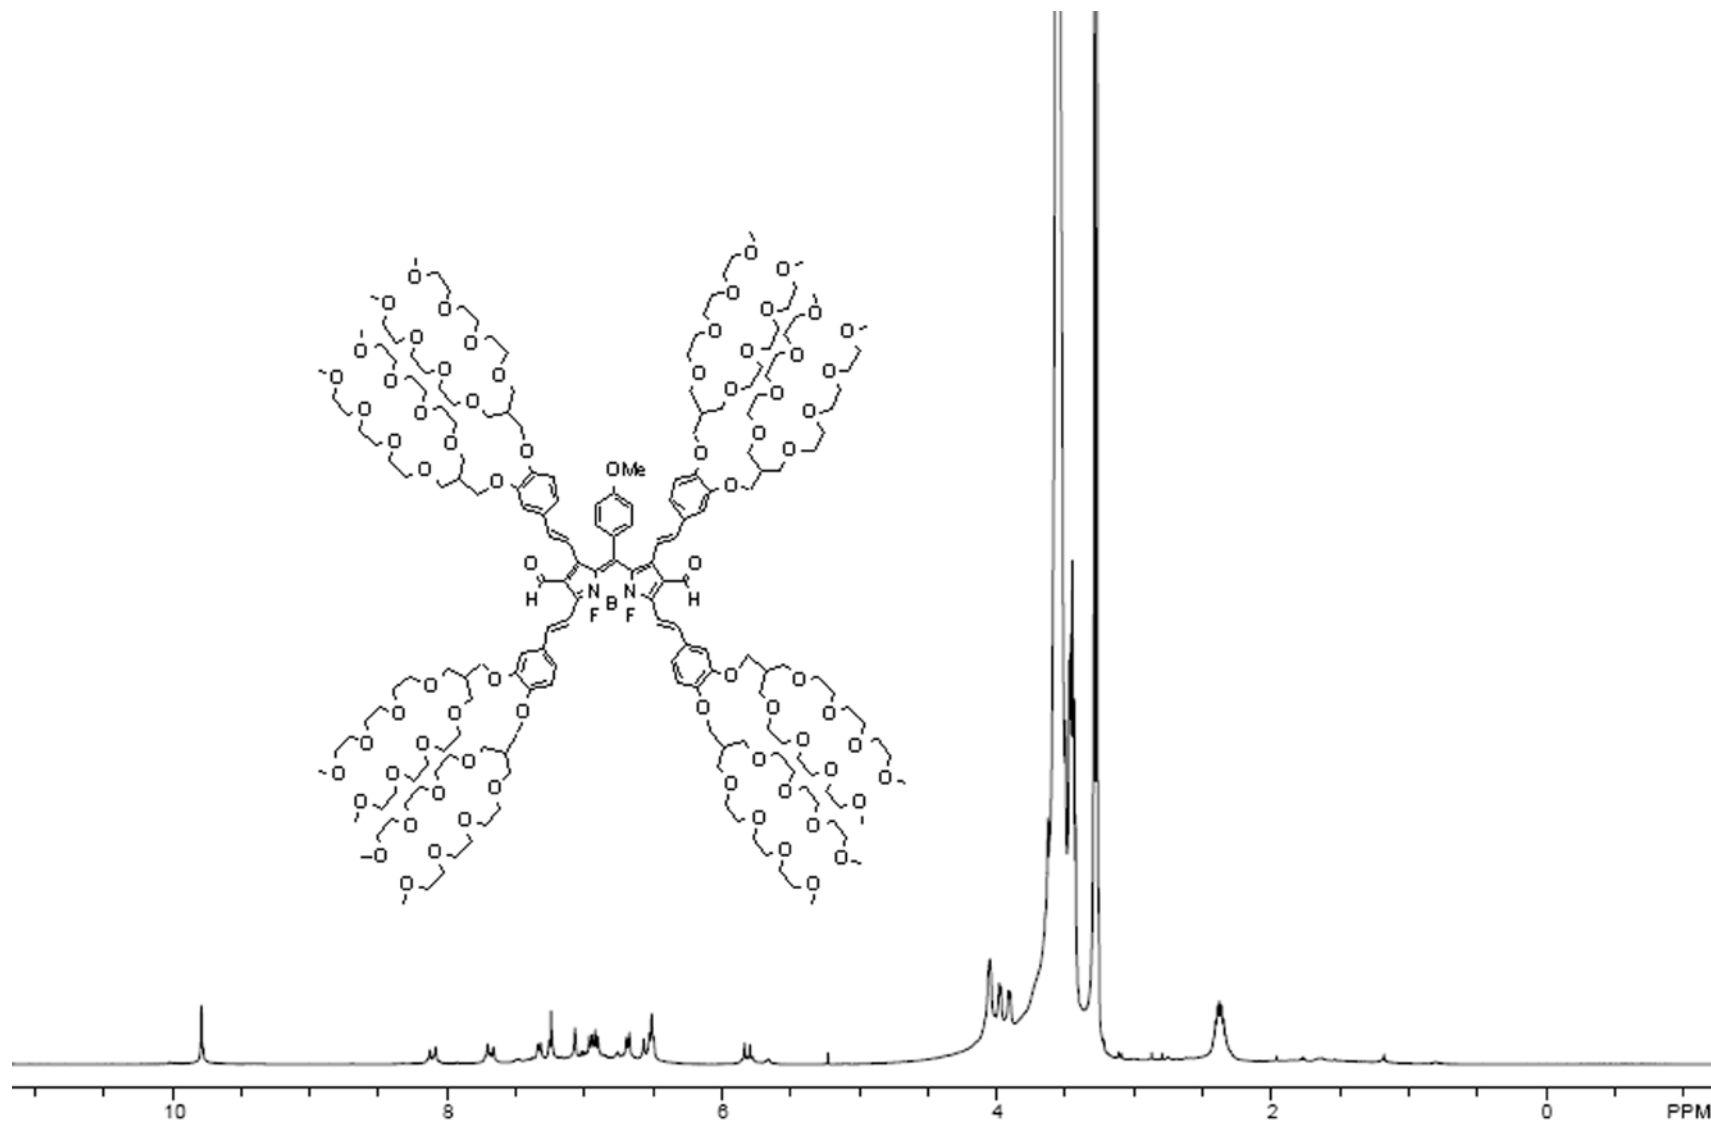

**Figure S27.**  $^1\text{H}$  NMR spectrum of BODIPY dye  $\mathbf{E}_b$  in  $\text{CDCl}_3$  solution.

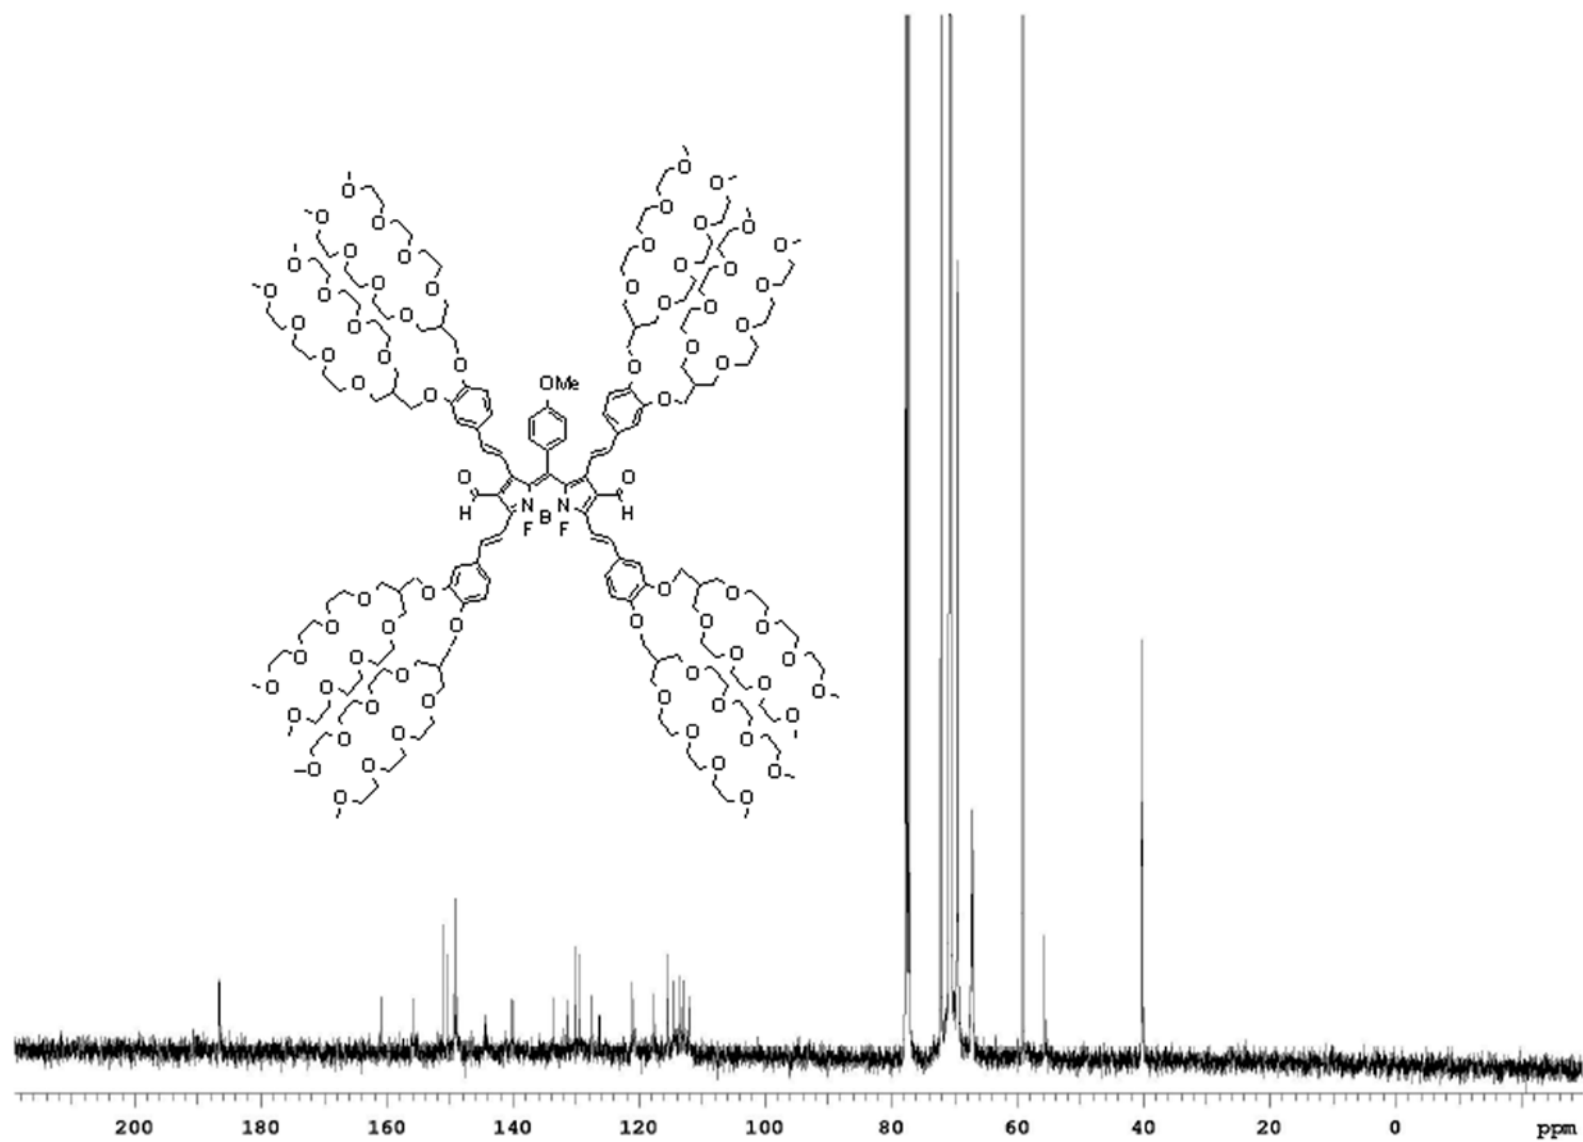

**Figure S28.** <sup>13</sup>C NMR spectrum of BODIPY dye **E<sub>b</sub>** in CDCl<sub>3</sub> solution.



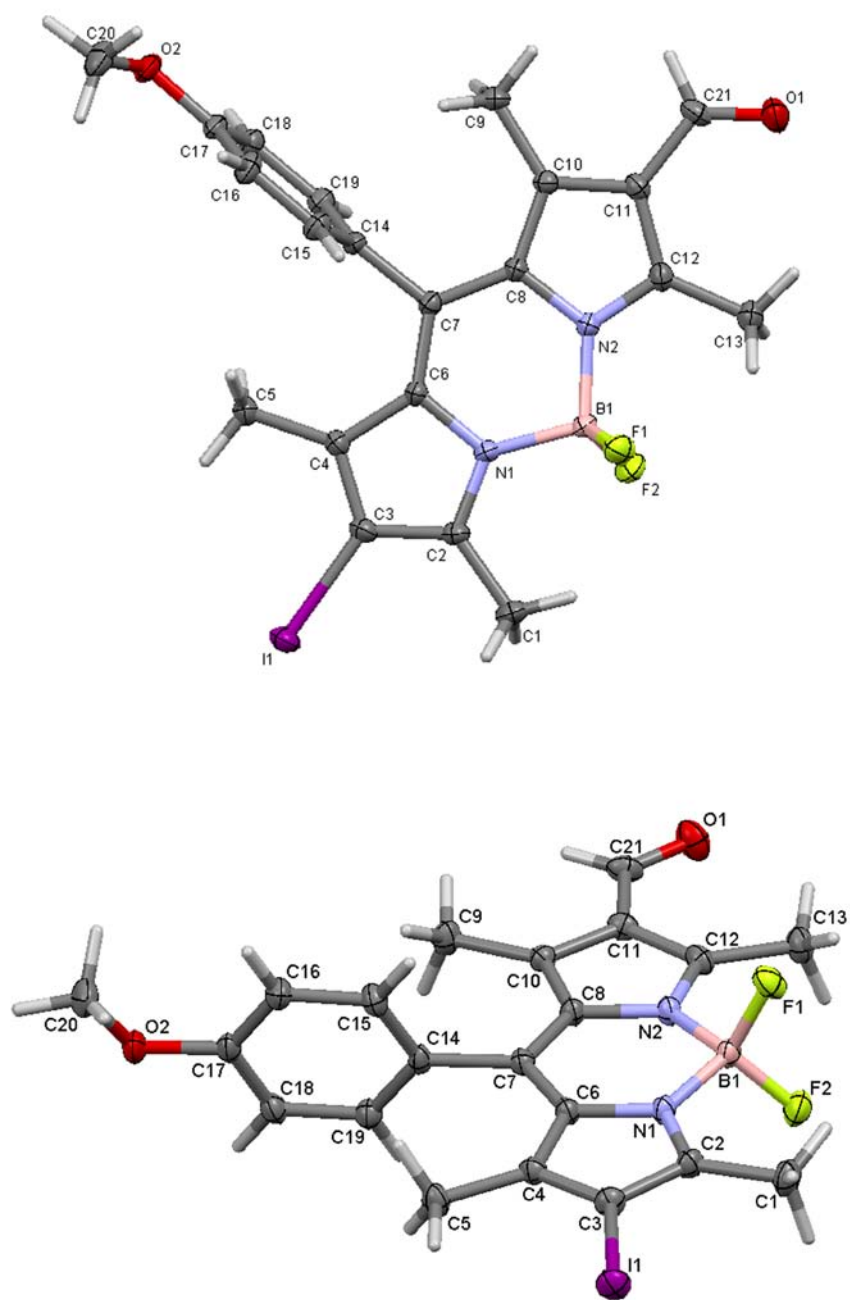

**Figure S29.** X-ray structure of BODIPY dye 4

**Table S1.** Experimental details for BODIPY dye 4

|              |            |
|--------------|------------|
|              | 11mz066_0m |
| Crystal data |            |

|                                                                                                                |                                                                                |
|----------------------------------------------------------------------------------------------------------------|--------------------------------------------------------------------------------|
| Chemical formula                                                                                               | C <sub>21</sub> H <sub>20</sub> BF <sub>2</sub> IN <sub>2</sub> O <sub>2</sub> |
| <i>M</i> <sub>r</sub>                                                                                          | 508.10                                                                         |
| Crystal system, space group                                                                                    | Triclinic, <i>P</i> <sup>-</sup> 1                                             |
| Temperature (K)                                                                                                | 100                                                                            |
| <i>a</i> , <i>b</i> , <i>c</i> (Å)                                                                             | 9.4100 (18), 10.603 (2), 11.494 (2)                                            |
| α, β, γ (°)                                                                                                    | 66.655 (2), 83.633 (3), 69.026 (2)                                             |
| <i>V</i> (Å <sup>3</sup> )                                                                                     | 982.5 (3)                                                                      |
| <i>Z</i>                                                                                                       | 2                                                                              |
| <i>F</i> (000)                                                                                                 | 504                                                                            |
| <i>D</i> <sub>x</sub> (Mg m <sup>-3</sup> )                                                                    | 1.717                                                                          |
| Radiation type                                                                                                 | Mo <i>K</i> α                                                                  |
| μ (mm <sup>-1</sup> )                                                                                          | 1.67                                                                           |
| Crystal shape                                                                                                  | Plate                                                                          |
| Colour                                                                                                         | Red                                                                            |
| Crystal size (mm)                                                                                              | 0.44 × 0.39 × 0.14                                                             |
| Data collection                                                                                                |                                                                                |
| Diffractometer                                                                                                 | Bruker AXS SMART APEX CCD diffractometer                                       |
| Radiation source                                                                                               | fine-focus sealed tube                                                         |
| Monochromator                                                                                                  | graphite                                                                       |
| Scan method                                                                                                    | ω scans                                                                        |
| Absorption correction                                                                                          | Multi-scan<br>Apex2 v2009.7-0 (Bruker, 2009)                                   |
| <i>T</i> <sub>min</sub> , <i>T</i> <sub>max</sub>                                                              | 0.641, 0.746                                                                   |
| No. of measured, independent and observed [ <i>I</i> > 2σ( <i>I</i> )] reflections                             | 17619, 5863, 5590                                                              |
| <i>R</i> <sub>int</sub>                                                                                        | 0.023                                                                          |
| θ values (°)                                                                                                   | θ <sub>max</sub> = 31.5, θ <sub>min</sub> = 1.9                                |
| Range of <i>h</i> , <i>k</i> , <i>l</i>                                                                        | <i>h</i> = -13→13, <i>k</i> = -15→15, <i>l</i> = -16→16                        |
| Refinement                                                                                                     |                                                                                |
| <i>R</i> [ <i>F</i> <sup>2</sup> > 2σ( <i>F</i> <sup>2</sup> )], <i>wR</i> ( <i>F</i> <sup>2</sup> ), <i>S</i> | 0.041, 0.097, 1.30                                                             |
| No. of reflections                                                                                             | 5863                                                                           |
| No. of parameters                                                                                              | 277                                                                            |
| No. of restraints                                                                                              | 3                                                                              |
| H-atom treatment                                                                                               | H-atom parameters constrained                                                  |
| Δρ <sub>max</sub> , Δρ <sub>min</sub> (e Å <sup>-3</sup> )                                                     | 0.84, -1.33                                                                    |

Computer programs: Apex2 v2011.2-0 (Bruker, 2009), Apex2 v2011.2-0, *SHELXTL* 6.14 (Bruker, 2000-2003; Sheldrick, 2008), *SHELXTL* 6.14.

Comments:

The iodine and aldehyde substituents are disordered over two chemically equivalent positions with a refined occupancy ratio of 0.8967(8) to 0.1033(8). Atoms of the minor moiety were constrained to have ADPs identical to their equivalents in the major moiety, and equivalent bond lengths were restrained to be the same in both moieties.

**Table S2. Selected geometric parameters (Å, °) for BODIPY dye 4**

|          |            |             |            |
|----------|------------|-------------|------------|
| B1-F2    | 1.382 (4)  | C10-C11     | 1.403 (4)  |
| B1-F1    | 1.406 (4)  | C11-C12     | 1.415 (4)  |
| B1-N2    | 1.545 (4)  | C11-C21     | 1.455 (5)  |
| B1-N1    | 1.547 (4)  | C11-I1B     | 1.996 (4)  |
| C1-C2    | 1.486 (4)  | C12-N2      | 1.347 (4)  |
| C1-H1A   | 0.9800     | C12-C13     | 1.496 (4)  |
| C1-H1B   | 0.9800     | C13-H13A    | 0.9800     |
| C1-H1C   | 0.9800     | C13-H13B    | 0.9800     |
| C2-N1    | 1.341 (4)  | C13-H13C    | 0.9800     |
| C2-C3    | 1.416 (4)  | C14-C15     | 1.385 (4)  |
| C3-C4    | 1.389 (4)  | C14-C19     | 1.395 (4)  |
| C3-C21B  | 1.485 (17) | C15-C16     | 1.396 (4)  |
| C3-I1    | 2.061 (3)  | C15-H15     | 0.9500     |
| C4-C6    | 1.432 (4)  | C16-C17     | 1.383 (5)  |
| C4-C5    | 1.495 (4)  | C16-H16     | 0.9500     |
| C5-H5A   | 0.9800     | C17-O2      | 1.371 (3)  |
| C5-H5B   | 0.9800     | C17-C18     | 1.391 (5)  |
| C5-H5C   | 0.9800     | C18-C19     | 1.386 (4)  |
| C6-C7    | 1.387 (4)  | C18-H18     | 0.9500     |
| C6-N1    | 1.405 (4)  | C19-H19     | 0.9500     |
| C7-C8    | 1.410 (4)  | C20-O2      | 1.427 (4)  |
| C7-C14   | 1.490 (4)  | C20-H20A    | 0.9800     |
| C8-N2    | 1.402 (4)  | C20-H20B    | 0.9800     |
| C8-C10   | 1.411 (4)  | C20-H20C    | 0.9800     |
| C9-C10   | 1.498 (4)  | C21-O1      | 1.212 (5)  |
| C9-H9A   | 0.9800     | C21-H21     | 0.9500     |
| C9-H9B   | 0.9800     | C21B-O1B    | 1.238 (19) |
| C9-H9C   | 0.9800     | C21B-H21B   | 0.9500     |
|          |            |             |            |
| F2-B1-F1 | 109.1 (2)  | C12-C11-C21 | 126.9 (3)  |
| F2-B1-N2 | 111.3 (3)  | C10-C11-I1B | 130.7 (2)  |

|            |            |               |            |
|------------|------------|---------------|------------|
| F1-B1-N2   | 109.9 (3)  | C12-C11-I1B   | 121.3 (2)  |
| F2-B1-N1   | 110.5 (3)  | N2-C12-C11    | 108.7 (3)  |
| F1-B1-N1   | 109.2 (3)  | N2-C12-C13    | 122.6 (3)  |
| N2-B1-N1   | 106.8 (2)  | C11-C12-C13   | 128.7 (3)  |
| C2-C1-H1A  | 109.5      | C12-C13-H13A  | 109.5      |
| C2-C1-H1B  | 109.5      | C12-C13-H13B  | 109.5      |
| H1A-C1-H1B | 109.5      | H13A-C13-H13B | 109.5      |
| C2-C1-H1C  | 109.5      | C12-C13-H13C  | 109.5      |
| H1A-C1-H1C | 109.5      | H13A-C13-H13C | 109.5      |
| H1B-C1-H1C | 109.5      | H13B-C13-H13C | 109.5      |
| N1-C2-C3   | 108.8 (3)  | C15-C14-C19   | 119.3 (3)  |
| N1-C2-C1   | 123.7 (3)  | C15-C14-C7    | 119.0 (3)  |
| C3-C2-C1   | 127.5 (3)  | C19-C14-C7    | 121.7 (3)  |
| C4-C3-C2   | 108.8 (3)  | C14-C15-C16   | 120.5 (3)  |
| C4-C3-C21B | 118.5 (10) | C14-C15-H15   | 119.7      |
| C2-C3-C21B | 130.7 (10) | C16-C15-H15   | 119.7      |
| C4-C3-I1   | 127.6 (2)  | C17-C16-C15   | 119.6 (3)  |
| C2-C3-I1   | 123.5 (2)  | C17-C16-H16   | 120.2      |
| C3-C4-C6   | 105.6 (3)  | C15-C16-H16   | 120.2      |
| C3-C4-C5   | 126.0 (3)  | O2-C17-C16    | 124.5 (3)  |
| C6-C4-C5   | 128.3 (3)  | O2-C17-C18    | 115.0 (3)  |
| C4-C5-H5A  | 109.5      | C16-C17-C18   | 120.5 (3)  |
| C4-C5-H5B  | 109.5      | C19-C18-C17   | 119.6 (3)  |
| H5A-C5-H5B | 109.5      | C19-C18-H18   | 120.2      |
| C4-C5-H5C  | 109.5      | C17-C18-H18   | 120.2      |
| H5A-C5-H5C | 109.5      | C18-C19-C14   | 120.5 (3)  |
| H5B-C5-H5C | 109.5      | C18-C19-H19   | 119.7      |
| C7-C6-N1   | 120.6 (3)  | C14-C19-H19   | 119.7      |
| C7-C6-C4   | 131.3 (3)  | O2-C20-H20A   | 109.5      |
| N1-C6-C4   | 108.1 (2)  | O2-C20-H20B   | 109.5      |
| C6-C7-C8   | 120.9 (3)  | H20A-C20-H20B | 109.5      |
| C6-C7-C14  | 119.4 (3)  | O2-C20-H20C   | 109.5      |
| C8-C7-C14  | 119.6 (3)  | H20A-C20-H20C | 109.5      |
| N2-C8-C7   | 120.4 (3)  | H20B-C20-H20C | 109.5      |
| N2-C8-C10  | 108.3 (2)  | O1-C21-C11    | 126.3 (4)  |
| C7-C8-C10  | 131.3 (3)  | O1-C21-H21    | 116.8      |
| C10-C9-H9A | 109.5      | C11-C21-H21   | 116.8      |
| C10-C9-H9B | 109.5      | O1B-C21B-C3   | 118.7 (19) |
| H9A-C9-H9B | 109.5      | O1B-C21B-H21B | 120.6      |
| C10-C9-H9C | 109.5      | C3-C21B-H21B  | 120.6      |
| H9A-C9-H9C | 109.5      | C2-N1-C6      | 108.7 (2)  |

|                |             |                 |            |
|----------------|-------------|-----------------|------------|
| H9B-C9-H9C     | 109.5       | C2-N1-B1        | 125.9 (2)  |
| C11-C10-C8     | 106.2 (3)   | C6-N1-B1        | 125.4 (2)  |
| C11-C10-C9     | 124.8 (3)   | C12-N2-C8       | 108.8 (2)  |
| C8-C10-C9      | 128.9 (3)   | C12-N2-B1       | 125.8 (2)  |
| C10-C11-C12    | 108.0 (3)   | C8-N2-B1        | 125.2 (2)  |
| C10-C11-C21    | 125.1 (3)   | C17-O2-C20      | 117.2 (3)  |
|                |             |                 |            |
| N1-C2-C3-C4    | 0.4 (4)     | C7-C14-C15-C16  | 177.8 (3)  |
| C1-C2-C3-C4    | -179.5 (3)  | C14-C15-C16-C17 | 0.9 (5)    |
| N1-C2-C3-C21B  | 163.8 (17)  | C15-C16-C17-O2  | -179.6 (3) |
| C1-C2-C3-C21B  | -16.1 (18)  | C15-C16-C17-C18 | -0.4 (5)   |
| N1-C2-C3-I1    | -177.0 (2)  | O2-C17-C18-C19  | 179.2 (3)  |
| C1-C2-C3-I1    | 3.1 (5)     | C16-C17-C18-C19 | 0.0 (5)    |
| C2-C3-C4-C6    | -1.2 (4)    | C17-C18-C19-C14 | 0.0 (5)    |
| C21B-C3-C4-C6  | -167.0 (15) | C15-C14-C19-C18 | 0.5 (5)    |
| I1-C3-C4-C6    | 176.0 (2)   | C7-C14-C19-C18  | -178.2 (3) |
| C2-C3-C4-C5    | 175.7 (3)   | C10-C11-C21-O1  | 179.6 (4)  |
| C21B-C3-C4-C5  | 10.0 (16)   | C12-C11-C21-O1  | -0.7 (6)   |
| I1-C3-C4-C5    | -7.0 (5)    | I1B-C11-C21-O1  | 24.9 (15)  |
| C3-C4-C6-C7    | 179.1 (3)   | C4-C3-C21B-O1B  | -179 (2)   |
| C5-C4-C6-C7    | 2.2 (6)     | C2-C3-C21B-O1B  | 19 (4)     |
| C3-C4-C6-N1    | 1.6 (3)     | I1-C3-C21B-O1B  | -52 (3)    |
| C5-C4-C6-N1    | -175.2 (3)  | C3-C2-N1-C6     | 0.7 (4)    |
| N1-C6-C7-C8    | 1.9 (5)     | C1-C2-N1-C6     | -179.4 (3) |
| C4-C6-C7-C8    | -175.3 (3)  | C3-C2-N1-B1     | 178.3 (3)  |
| N1-C6-C7-C14   | -176.0 (3)  | C1-C2-N1-B1     | -1.7 (5)   |
| C4-C6-C7-C14   | 6.8 (5)     | C7-C6-N1-C2     | -179.2 (3) |
| C6-C7-C8-N2    | -0.2 (5)    | C4-C6-N1-C2     | -1.4 (3)   |
| C14-C7-C8-N2   | 177.7 (3)   | C7-C6-N1-B1     | 3.1 (5)    |
| C6-C7-C8-C10   | 179.1 (3)   | C4-C6-N1-B1     | -179.1 (3) |
| C14-C7-C8-C10  | -3.0 (5)    | F2-B1-N1-C2     | 53.3 (4)   |
| N2-C8-C10-C11  | 0.6 (3)     | F1-B1-N1-C2     | -66.7 (4)  |
| C7-C8-C10-C11  | -178.8 (3)  | N2-B1-N1-C2     | 174.5 (3)  |
| N2-C8-C10-C9   | -179.6 (3)  | F2-B1-N1-C6     | -129.4 (3) |
| C7-C8-C10-C9   | 1.0 (6)     | F1-B1-N1-C6     | 110.6 (3)  |
| C8-C10-C11-C12 | -0.5 (3)    | N2-B1-N1-C6     | -8.2 (4)   |
| C9-C10-C11-C12 | 179.6 (3)   | C11-C12-N2-C8   | 0.1 (3)    |
| C8-C10-C11-C21 | 179.2 (3)   | C13-C12-N2-C8   | -179.4 (3) |
| C9-C10-C11-C21 | -0.7 (5)    | C11-C12-N2-B1   | -174.2 (3) |
| C8-C10-C11-I1B | -177.3 (3)  | C13-C12-N2-B1   | 6.3 (5)    |
| C9-C10-C11-I1B | 2.8 (5)     | C7-C8-N2-C12    | 179.1 (3)  |

|                 |            |                |            |
|-----------------|------------|----------------|------------|
| C10-C11-C12-N2  | 0.3 (4)    | C10-C8-N2-C12  | -0.4 (3)   |
| C21-C11-C12-N2  | -179.4 (3) | C7-C8-N2-B1    | -6.6 (5)   |
| I1B-C11-C12-N2  | 177.4 (2)  | C10-C8-N2-B1   | 173.9 (3)  |
| C10-C11-C12-C13 | 179.7 (3)  | F2-B1-N2-C12   | -56.0 (4)  |
| C21-C11-C12-C13 | 0.0 (6)    | F1-B1-N2-C12   | 65.0 (4)   |
| I1B-C11-C12-C13 | -3.1 (5)   | N1-B1-N2-C12   | -176.7 (3) |
| C6-C7-C14-C15   | 79.3 (4)   | F2-B1-N2-C8    | 130.6 (3)  |
| C8-C7-C14-C15   | -98.6 (4)  | F1-B1-N2-C8    | -108.4 (3) |
| C6-C7-C14-C19   | -102.0 (4) | N1-B1-N2-C8    | 9.9 (4)    |
| C8-C7-C14-C19   | 80.1 (4)   | C16-C17-O2-C20 | -10.5 (5)  |
| C19-C14-C15-C16 | -1.0 (5)   | C18-C17-O2-C20 | 170.3 (3)  |

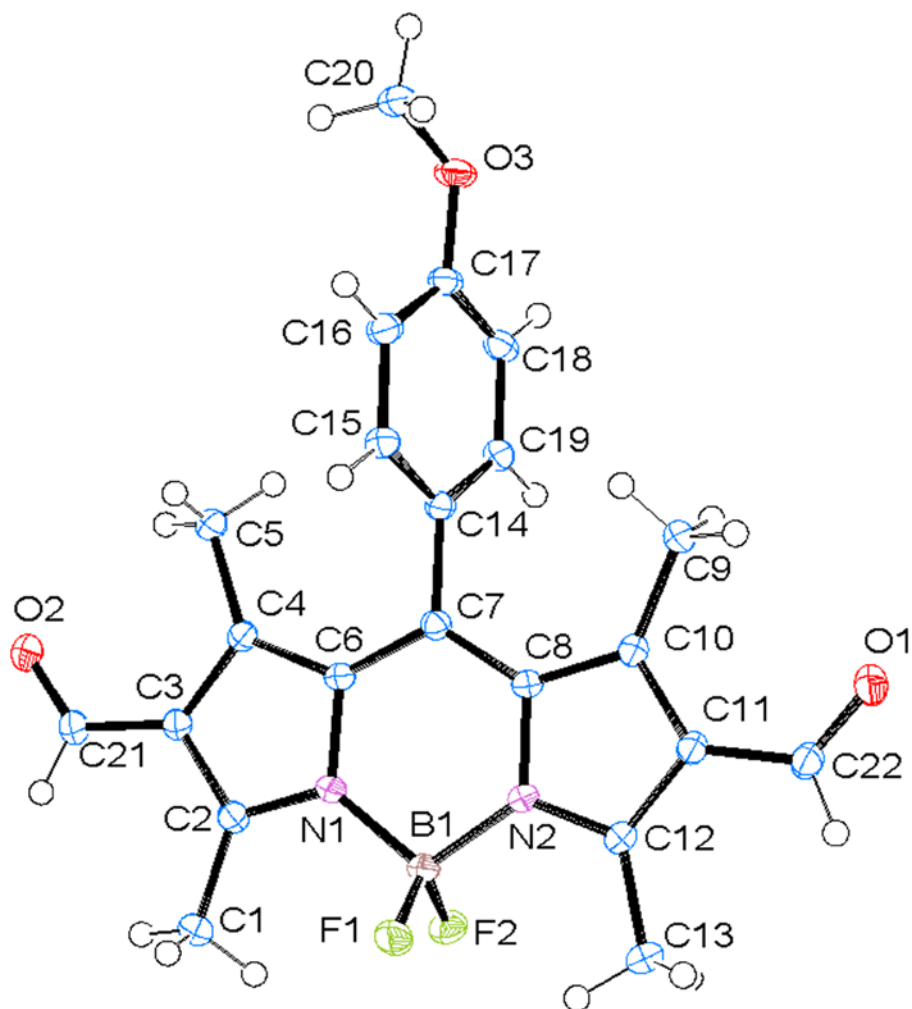

**Figure S30.** X-ray structure of BODIPY dye 6

**Table S3.** Crystal data and structure refinement for 11lr004\_0m.  
For BODIPY dye 6

|                     |                                                                                |
|---------------------|--------------------------------------------------------------------------------|
| Identification code | 11lr004_0m                                                                     |
| Empirical formula   | C <sub>22</sub> H <sub>21</sub> B F <sub>2</sub> N <sub>2</sub> O <sub>3</sub> |
| Formula weight      | 410.22                                                                         |
| Temperature         | 447(2) K                                                                       |
| Wavelength          | 0.71073 Å                                                                      |

Crystal system, space group    Triclinic, P -1  
Unit cell dimensions            a = 6.5685(5) Å    alpha = 81.7570(10) deg.  
                                          b = 8.8104(6) Å    beta = 84.9650(10) deg.  
                                          c = 16.4780(10) Å    gamma = 85.8970(10) deg.  
Volume                            938.42(11) Å<sup>3</sup>  
Z, Calculated density            2, 1.452 Mg/m<sup>3</sup>  
Absorption coefficient          0.109 mm<sup>-1</sup>  
F(000)                            428  
Crystal size                      0.55 x 0.17 x 0.06 mm  
Theta range for data collection 1.25 to 30.25 deg.  
Limiting indices                -9<=h<=9, -12<=k<=12, -22<=l<=22  
Reflections collected / unique 10755 / 5282 [R(int) = 0.0222]  
Completeness to theta = 28.00 98.7 %  
Absorption correction          Semi-empirical from equivalents  
Max. and min. transmission    0.746 and 0.677  
Refinement method              Full-matrix least-squares on F<sup>2</sup>  
Data / restraints / parameters 5282 / 0 / 276  
Goodness-of-fit on F<sup>2</sup>          1.029  
Final R indices [I>2sigma(I)]   R1 = 0.0477, wR2 = 0.1132  
R indices (all data)            R1 = 0.0640, wR2 = 0.1258  
Largest diff. peak and hole    0.371 and -0.373 e.Å<sup>-3</sup>

**Table S4. Atomic coordinates (x 10<sup>4</sup>) and equivalent isotropic displacement parameters (Å<sup>2</sup> x 10<sup>3</sup>) for 11rlr004\_0m. U(eq) is defined as one third of the trace of the orthogonalized Uij tensor. For BODIPY dye 6**

---

|       | x        | y        | z       | U(eq) |
|-------|----------|----------|---------|-------|
| B(1)  | 7496(3)  | 3068(2)  | 6190(1) | 18(1) |
| F(1)  | 8582(2)  | 3217(1)  | 5428(1) | 25(1) |
| F(2)  | 6347(2)  | 4426(1)  | 6295(1) | 24(1) |
| N(1)  | 6064(2)  | 1722(1)  | 6273(1) | 16(1) |
| N(2)  | 8983(2)  | 2675(1)  | 6881(1) | 16(1) |
| C(1)  | 4168(3)  | 2747(2)  | 5047(1) | 22(1) |
| C(2)  | 4545(2)  | 1621(2)  | 5793(1) | 17(1) |
| C(3)  | 3454(2)  | 305(2)   | 6108(1) | 17(1) |
| C(4)  | 4382(2)  | -432(2)  | 6806(1) | 16(1) |
| C(5)  | 3699(2)  | -1886(2) | 7309(1) | 20(1) |
| C(6)  | 6040(2)  | 463(2)   | 6904(1) | 15(1) |
| C(7)  | 7478(2)  | 293(2)   | 7496(1) | 15(1) |
| C(8)  | 8950(2)  | 1377(2)  | 7484(1) | 15(1) |
| C(9)  | 11247(2) | 308(2)   | 8697(1) | 20(1) |
| C(10) | 10607(2) | 1419(2)  | 7979(1) | 16(1) |
| C(11) | 11599(2) | 2768(2)  | 7659(1) | 16(1) |
| C(12) | 10551(2) | 3510(2)  | 6983(1) | 17(1) |
| C(13) | 11016(3) | 4973(2)  | 6446(1) | 22(1) |

---



|       |          |          |         |       |
|-------|----------|----------|---------|-------|
| C(14) | 7471(2)  | -1086(2) | 8127(1) | 16(1) |
| C(15) | 8091(2)  | -2514(2) | 7896(1) | 18(1) |
| C(16) | 8114(2)  | -3835(2) | 8469(1) | 20(1) |
| C(17) | 7487(2)  | -3725(2) | 9289(1) | 19(1) |
| C(18) | 6833(2)  | -2292(2) | 9527(1) | 19(1) |
| C(19) | 6836(2)  | -987(2)  | 8951(1) | 17(1) |
| O(3)  | 7473(2)  | -4927(1) | 9906(1) | 25(1) |
| C(20) | 8110(3)  | -6405(2) | 9681(1) | 28(1) |
| C(21) | 1641(2)  | -95(2)   | 5756(1) | 20(1) |
| O(1)  | 14470(2) | 2683(1)  | 8458(1) | 24(1) |
| C(22) | 13424(2) | 3341(2)  | 7927(1) | 20(1) |
| O(2)  | 569(2)   | -1153(1) | 6035(1) | 25(1) |

---

**Table S5. Bond lengths [Å] and angles [deg] for 11rlr004\_0m. For BODIPY dye 6**

---

|             |            |
|-------------|------------|
| B(1)-F(1)   | 1.3825(19) |
| B(1)-F(2)   | 1.3920(19) |
| B(1)-N(1)   | 1.549(2)   |
| B(1)-N(2)   | 1.551(2)   |
| N(1)-C(2)   | 1.3423(18) |
| N(1)-C(6)   | 1.4067(17) |
| N(2)-C(12)  | 1.3427(18) |
| N(2)-C(8)   | 1.4027(17) |
| C(1)-C(2)   | 1.491(2)   |
| C(1)-H(1A)  | 0.9600     |
| C(1)-H(1B)  | 0.9600     |
| C(1)-H(1C)  | 0.9600     |
| C(2)-C(3)   | 1.418(2)   |
| C(3)-C(4)   | 1.402(2)   |
| C(3)-C(21)  | 1.456(2)   |
| C(4)-C(6)   | 1.423(2)   |
| C(4)-C(5)   | 1.4970(19) |
| C(5)-H(5A)  | 0.9600     |
| C(5)-H(5B)  | 0.9600     |
| C(5)-H(5C)  | 0.9600     |
| C(6)-C(7)   | 1.4029(19) |
| C(7)-C(8)   | 1.4040(19) |
| C(7)-C(14)  | 1.4811(19) |
| C(8)-C(10)  | 1.422(2)   |
| C(9)-C(10)  | 1.4936(19) |
| C(9)-H(9A)  | 0.9600     |
| C(9)-H(9B)  | 0.9600     |
| C(9)-H(9C)  | 0.9600     |
| C(10)-C(11) | 1.4097(19) |

|                  |            |
|------------------|------------|
| C(11)-C(12)      | 1.415(2)   |
| C(11)-C(22)      | 1.459(2)   |
| C(12)-C(13)      | 1.4905(19) |
| C(13)-H(13A)     | 0.9600     |
| C(13)-H(13B)     | 0.9600     |
| C(13)-H(13C)     | 0.9600     |
| C(14)-C(15)      | 1.389(2)   |
| C(14)-C(19)      | 1.398(2)   |
| C(15)-C(16)      | 1.390(2)   |
| C(15)-H(15)      | 0.9300     |
| C(16)-C(17)      | 1.392(2)   |
| C(16)-H(16)      | 0.9300     |
| C(17)-O(3)       | 1.3588(17) |
| C(17)-C(18)      | 1.402(2)   |
| C(18)-C(19)      | 1.382(2)   |
| C(18)-H(18)      | 0.9300     |
| C(19)-H(19)      | 0.9300     |
| O(3)-C(20)       | 1.429(2)   |
| C(20)-H(20A)     | 0.9600     |
| C(20)-H(20B)     | 0.9600     |
| C(20)-H(20C)     | 0.9600     |
| C(21)-O(2)       | 1.2211(18) |
| C(21)-H(21)      | 0.9300     |
| O(1)-C(22)       | 1.2154(19) |
| C(22)-H(22)      | 0.9300     |
|                  |            |
| F(1)-B(1)-F(2)   | 110.14(12) |
| F(1)-B(1)-N(1)   | 110.23(13) |
| F(2)-B(1)-N(1)   | 109.78(13) |
| F(1)-B(1)-N(2)   | 110.21(13) |
| F(2)-B(1)-N(2)   | 109.63(13) |
| N(1)-B(1)-N(2)   | 106.79(11) |
| C(2)-N(1)-C(6)   | 108.73(12) |
| C(2)-N(1)-B(1)   | 125.65(12) |
| C(6)-N(1)-B(1)   | 125.46(12) |
| C(12)-N(2)-C(8)  | 109.07(12) |
| C(12)-N(2)-B(1)  | 125.10(12) |
| C(8)-N(2)-B(1)   | 125.80(12) |
| C(2)-C(1)-H(1A)  | 109.5      |
| C(2)-C(1)-H(1B)  | 109.5      |
| H(1A)-C(1)-H(1B) | 109.5      |
| C(2)-C(1)-H(1C)  | 109.5      |
| H(1A)-C(1)-H(1C) | 109.5      |
| H(1B)-C(1)-H(1C) | 109.5      |
| N(1)-C(2)-C(3)   | 109.11(12) |
| N(1)-C(2)-C(1)   | 123.02(13) |
| C(3)-C(2)-C(1)   | 127.87(13) |
| C(4)-C(3)-C(2)   | 107.94(13) |
| C(4)-C(3)-C(21)  | 128.84(14) |
| C(2)-C(3)-C(21)  | 123.16(13) |
| C(3)-C(4)-C(6)   | 106.14(12) |
| C(3)-C(4)-C(5)   | 124.41(13) |
| C(6)-C(4)-C(5)   | 129.44(13) |
| C(4)-C(5)-H(5A)  | 109.5      |

|                     |            |
|---------------------|------------|
| C(4)-C(5)-H(5B)     | 109.5      |
| H(5A)-C(5)-H(5B)    | 109.5      |
| C(4)-C(5)-H(5C)     | 109.5      |
| H(5A)-C(5)-H(5C)    | 109.5      |
| H(5B)-C(5)-H(5C)    | 109.5      |
| C(7)-C(6)-N(1)      | 120.39(12) |
| C(7)-C(6)-C(4)      | 131.53(13) |
| N(1)-C(6)-C(4)      | 108.06(12) |
| C(6)-C(7)-C(8)      | 121.16(13) |
| C(6)-C(7)-C(14)     | 118.88(12) |
| C(8)-C(7)-C(14)     | 119.93(13) |
| N(2)-C(8)-C(7)      | 120.22(13) |
| N(2)-C(8)-C(10)     | 108.11(12) |
| C(7)-C(8)-C(10)     | 131.62(13) |
| C(10)-C(9)-H(9A)    | 109.5      |
| C(10)-C(9)-H(9B)    | 109.5      |
| H(9A)-C(9)-H(9B)    | 109.5      |
| C(10)-C(9)-H(9C)    | 109.5      |
| H(9A)-C(9)-H(9C)    | 109.5      |
| H(9B)-C(9)-H(9C)    | 109.5      |
| C(11)-C(10)-C(8)    | 105.91(12) |
| C(11)-C(10)-C(9)    | 124.71(13) |
| C(8)-C(10)-C(9)     | 129.38(13) |
| C(10)-C(11)-C(12)   | 107.97(13) |
| C(10)-C(11)-C(22)   | 128.50(13) |
| C(12)-C(11)-C(22)   | 123.49(13) |
| N(2)-C(12)-C(11)    | 108.93(12) |
| N(2)-C(12)-C(13)    | 122.91(13) |
| C(11)-C(12)-C(13)   | 128.16(13) |
| C(12)-C(13)-H(13A)  | 109.5      |
| C(12)-C(13)-H(13B)  | 109.5      |
| H(13A)-C(13)-H(13B) | 109.5      |
| C(12)-C(13)-H(13C)  | 109.5      |
| H(13A)-C(13)-H(13C) | 109.5      |
| H(13B)-C(13)-H(13C) | 109.5      |
| C(15)-C(14)-C(19)   | 119.11(13) |
| C(15)-C(14)-C(7)    | 119.44(13) |
| C(19)-C(14)-C(7)    | 121.45(13) |
| C(14)-C(15)-C(16)   | 121.20(14) |
| C(14)-C(15)-H(15)   | 119.4      |
| C(16)-C(15)-H(15)   | 119.4      |
| C(15)-C(16)-C(17)   | 119.32(14) |
| C(15)-C(16)-H(16)   | 120.3      |
| C(17)-C(16)-H(16)   | 120.3      |
| O(3)-C(17)-C(16)    | 124.67(14) |
| O(3)-C(17)-C(18)    | 115.43(14) |
| C(16)-C(17)-C(18)   | 119.90(13) |
| C(19)-C(18)-C(17)   | 120.14(14) |
| C(19)-C(18)-H(18)   | 119.9      |
| C(17)-C(18)-H(18)   | 119.9      |
| C(18)-C(19)-C(14)   | 120.32(14) |
| C(18)-C(19)-H(19)   | 119.8      |
| C(14)-C(19)-H(19)   | 119.8      |
| C(17)-O(3)-C(20)    | 116.71(13) |

|                     |            |
|---------------------|------------|
| O(3)-C(20)-H(20A)   | 109.5      |
| O(3)-C(20)-H(20B)   | 109.5      |
| H(20A)-C(20)-H(20B) | 109.5      |
| O(3)-C(20)-H(20C)   | 109.5      |
| H(20A)-C(20)-H(20C) | 109.5      |
| H(20B)-C(20)-H(20C) | 109.5      |
| O(2)-C(21)-C(3)     | 125.77(14) |
| O(2)-C(21)-H(21)    | 117.1      |
| C(3)-C(21)-H(21)    | 117.1      |
| O(1)-C(22)-C(11)    | 125.83(14) |
| O(1)-C(22)-H(22)    | 117.1      |
| C(11)-C(22)-H(22)   | 117.1      |

---

Symmetry transformations used to generate equivalent atoms:

**Table S6. Anisotropic displacement parameters ( $\text{\AA}^2 \times 10^3$ ) for 11rlr004\_0m.  
The anisotropic displacement factor exponent takes the form:  
 $-2 \pi^2 [ h^2 a^{*2} U_{11} + \dots + 2 h k a^* b^* U_{12} ]$  For BODIPY dye 6**

---

|       | U11   | U22   | U33   | U23   | U13   | U12    |
|-------|-------|-------|-------|-------|-------|--------|
| B(1)  | 19(1) | 16(1) | 17(1) | 2(1)  | -4(1) | -3(1)  |
| F(1)  | 28(1) | 31(1) | 17(1) | 3(1)  | -2(1) | -11(1) |
| F(2)  | 27(1) | 14(1) | 32(1) | 2(1)  | -9(1) | 0(1)   |
| N(1)  | 18(1) | 15(1) | 15(1) | 1(1)  | -5(1) | -2(1)  |
| N(2)  | 18(1) | 13(1) | 16(1) | 0(1)  | -2(1) | -3(1)  |
| C(1)  | 26(1) | 19(1) | 20(1) | 1(1)  | -7(1) | -1(1)  |
| C(2)  | 19(1) | 16(1) | 16(1) | -2(1) | -3(1) | -1(1)  |
| C(3)  | 19(1) | 15(1) | 18(1) | -2(1) | -6(1) | -1(1)  |
| C(4)  | 16(1) | 14(1) | 17(1) | -2(1) | -2(1) | -2(1)  |
| C(5)  | 21(1) | 18(1) | 22(1) | 2(1)  | -6(1) | -6(1)  |
| C(6)  | 17(1) | 14(1) | 15(1) | 0(1)  | -2(1) | -2(1)  |
| C(7)  | 16(1) | 14(1) | 15(1) | -2(1) | -1(1) | 0(1)   |
| C(8)  | 17(1) | 13(1) | 15(1) | 0(1)  | -2(1) | -1(1)  |
| C(9)  | 20(1) | 19(1) | 21(1) | 1(1)  | -7(1) | -4(1)  |
| C(10) | 17(1) | 15(1) | 16(1) | -3(1) | -2(1) | -2(1)  |
| C(11) | 18(1) | 16(1) | 16(1) | -3(1) | -2(1) | -3(1)  |
| C(12) | 18(1) | 14(1) | 19(1) | -2(1) | -2(1) | -3(1)  |
| C(13) | 27(1) | 15(1) | 24(1) | 2(1)  | -3(1) | -6(1)  |
| C(14) | 14(1) | 15(1) | 18(1) | 1(1)  | -4(1) | -3(1)  |
| C(15) | 20(1) | 18(1) | 18(1) | 0(1)  | -1(1) | -3(1)  |
| C(16) | 21(1) | 16(1) | 23(1) | 0(1)  | -2(1) | -2(1)  |
| C(17) | 16(1) | 19(1) | 20(1) | 6(1)  | -5(1) | -4(1)  |
| C(18) | 18(1) | 23(1) | 16(1) | 2(1)  | -2(1) | -3(1)  |
| C(19) | 17(1) | 17(1) | 18(1) | -1(1) | -3(1) | -2(1)  |

|       |       |       |       |       |        |       |
|-------|-------|-------|-------|-------|--------|-------|
| O(3)  | 27(1) | 21(1) | 23(1) | 9(1)  | -5(1)  | -5(1) |
| C(20) | 31(1) | 18(1) | 34(1) | 7(1)  | -13(1) | -7(1) |
| C(21) | 22(1) | 20(1) | 20(1) | -3(1) | -8(1)  | -3(1) |
| O(1)  | 23(1) | 27(1) | 22(1) | -3(1) | -6(1)  | -6(1) |
| C(22) | 21(1) | 20(1) | 20(1) | -3(1) | -2(1)  | -7(1) |
| O(2)  | 26(1) | 25(1) | 25(1) | -2(1) | -8(1)  | -9(1) |

---

**Table S7. Hydrogen coordinates ( x 10<sup>4</sup>) and isotropic displacement parameters (A<sup>2</sup> x 10<sup>3</sup>) for 11rlr004\_0m.  
For BODIPY dye 6**

---

|        | x     | y     | z     | U(eq) |
|--------|-------|-------|-------|-------|
| H(1A)  | 4442  | 3757  | 5146  | 33    |
| H(1B)  | 2767  | 2737  | 4925  | 33    |
| H(1C)  | 5053  | 2471  | 4589  | 33    |
| H(5A)  | 2242  | -1919 | 7305  | 30    |
| H(5B)  | 4054  | -1918 | 7864  | 30    |
| H(5C)  | 4363  | -2752 | 7080  | 30    |
| H(9A)  | 12703 | 304   | 8720  | 30    |
| H(9B)  | 10877 | -703  | 8638  | 30    |
| H(9C)  | 10573 | 610   | 9195  | 30    |
| H(13A) | 10272 | 5067  | 5963  | 33    |
| H(13B) | 12458 | 4971  | 6287  | 33    |
| H(13C) | 10618 | 5825  | 6741  | 33    |
| H(15)  | 8499  | -2587 | 7347  | 22    |
| H(16)  | 8544  | -4782 | 8307  | 24    |
| H(18)  | 6397  | -2220 | 10073 | 23    |
| H(19)  | 6413  | -38   | 9112  | 21    |
| H(20A) | 7243  | -6647 | 9283  | 42    |
| H(20B) | 8012  | -7165 | 10160 | 42    |
| H(20C) | 9501  | -6397 | 9448  | 42    |
| H(21)  | 1266  | 510   | 5275  | 24    |
| H(22)  | 13821 | 4294  | 7668  | 24    |

---

## Absorption and Emission spectra of BODIPY dyes

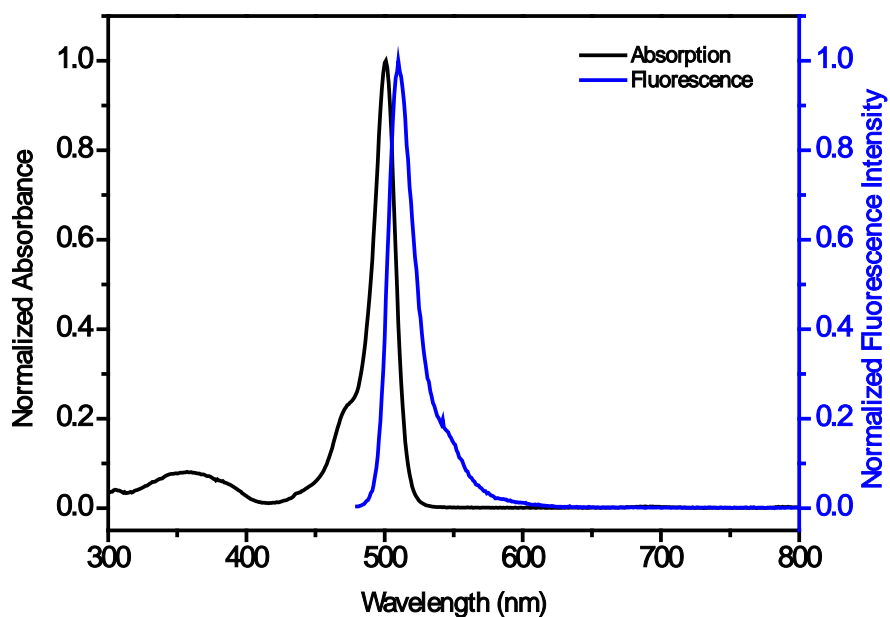

**Figure S31.** Normalized absorption and emission spectra of BODIPY dye **2** in methylene chloride solution (excitation wavelength was at 470 nm).

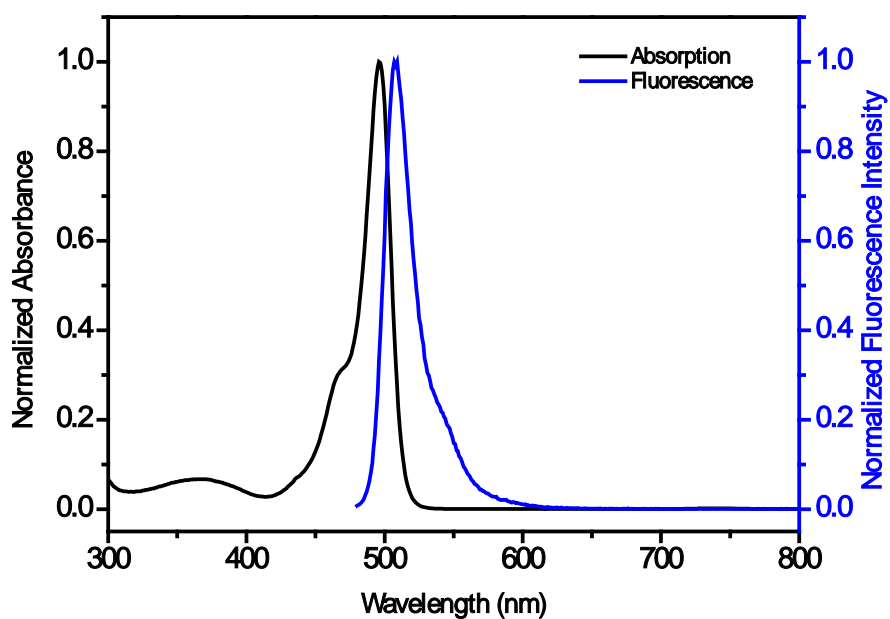

**Figure S32.** Normalized absorption and emission spectra of BODIPY dye **3** in methylene chloride solution (excitation wavelength was at 470 nm).

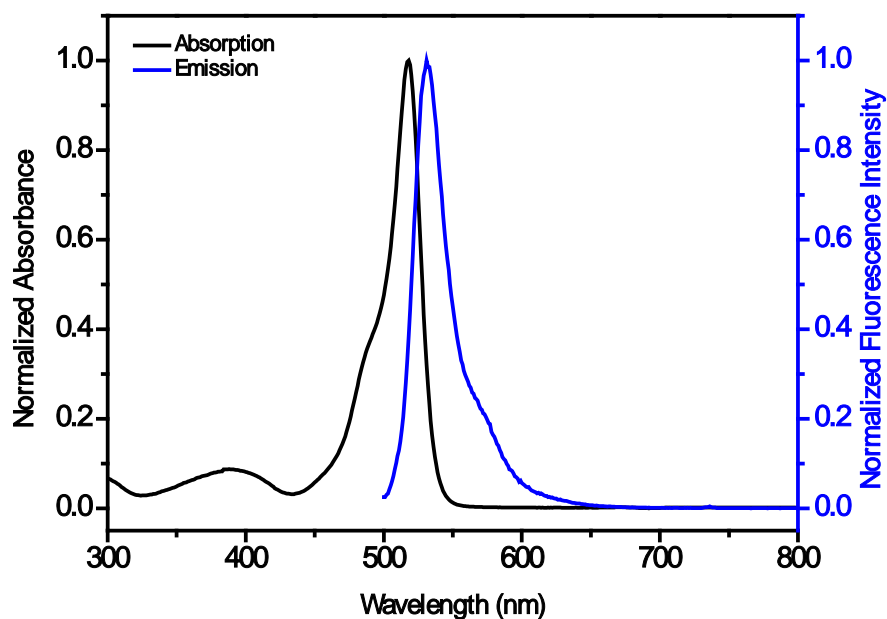

**Figure S33.** Normalized absorption and emission spectra of BODIPY dye **4** in methylene chloride solution (excitation wavelength was at 490 nm)

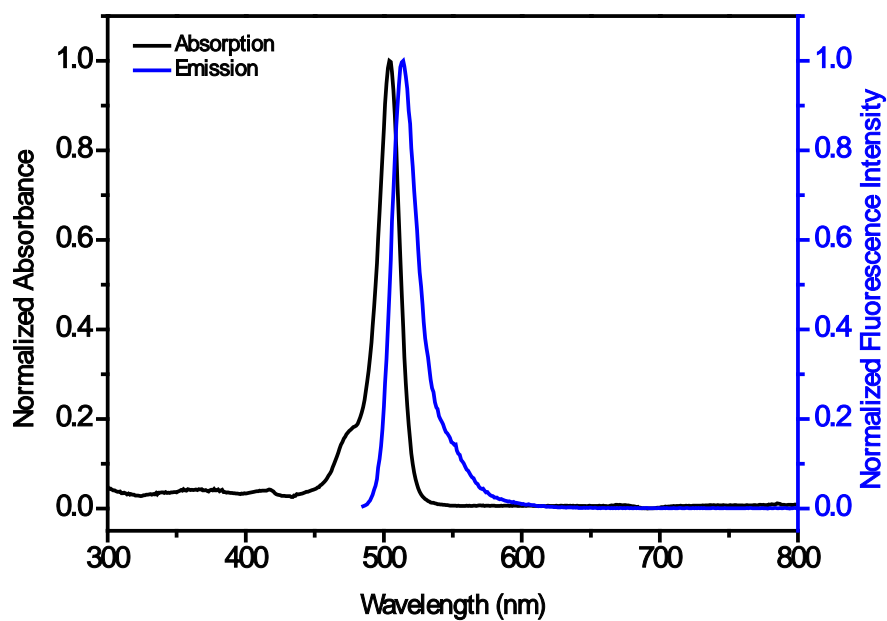

**Figure S34.** Normalized absorption and emission spectra of BODIPY dye **6** in methylene chloride solution (excitation wavelength was at 475 nm)

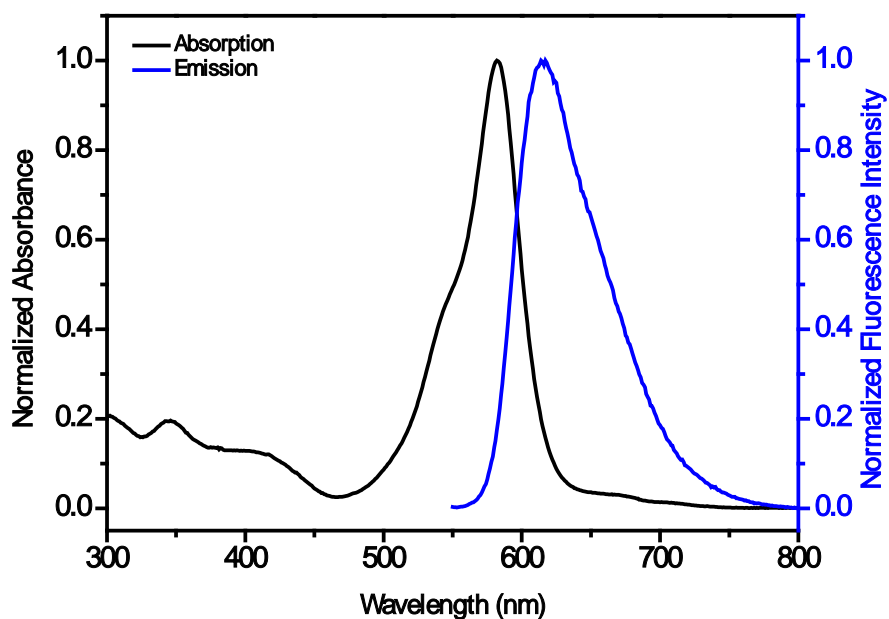

**Figure S35.** Normalized absorption and emission spectra of BODIPY dye **A** in methylene chloride solution (excitation wavelength was at 540 nm)

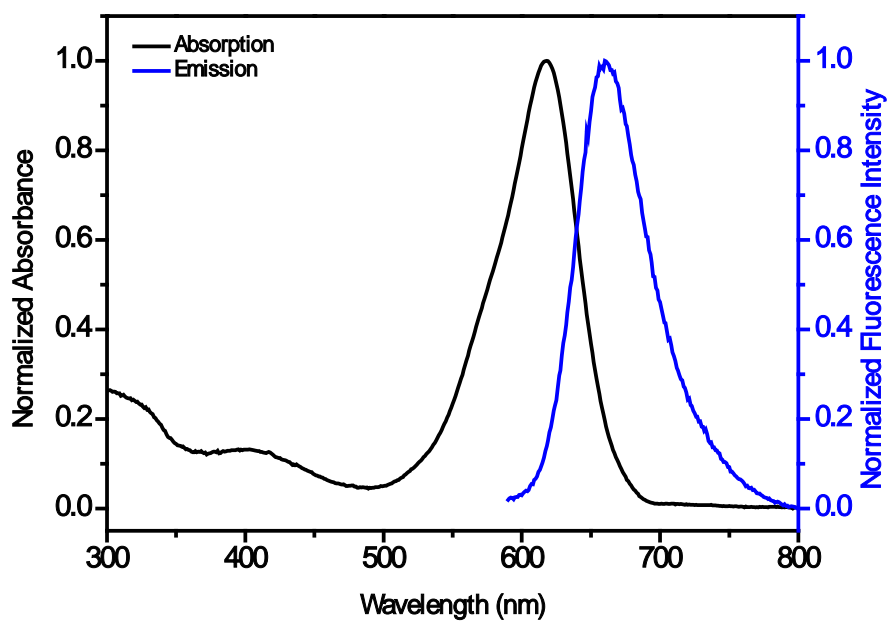

**Figure S36.** Normalized absorption and emission spectra of BODIPY dye **B** in methylene chloride solution (excitation wavelength was at 580 nm)



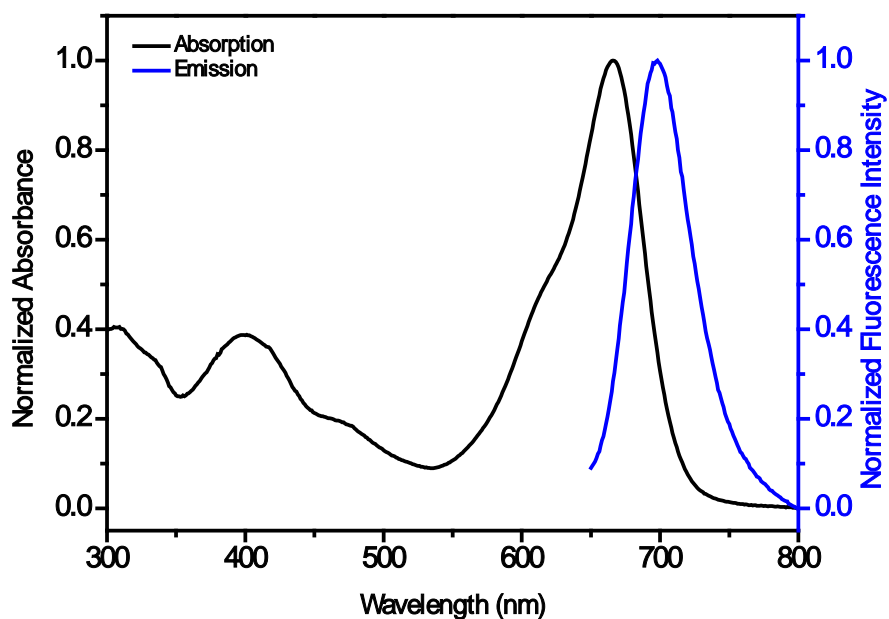

**Figure S37.** Normalized absorption and emission spectra of BODIPY dye **C** in methylene chloride solution (excitation wavelength was at 640 nm)

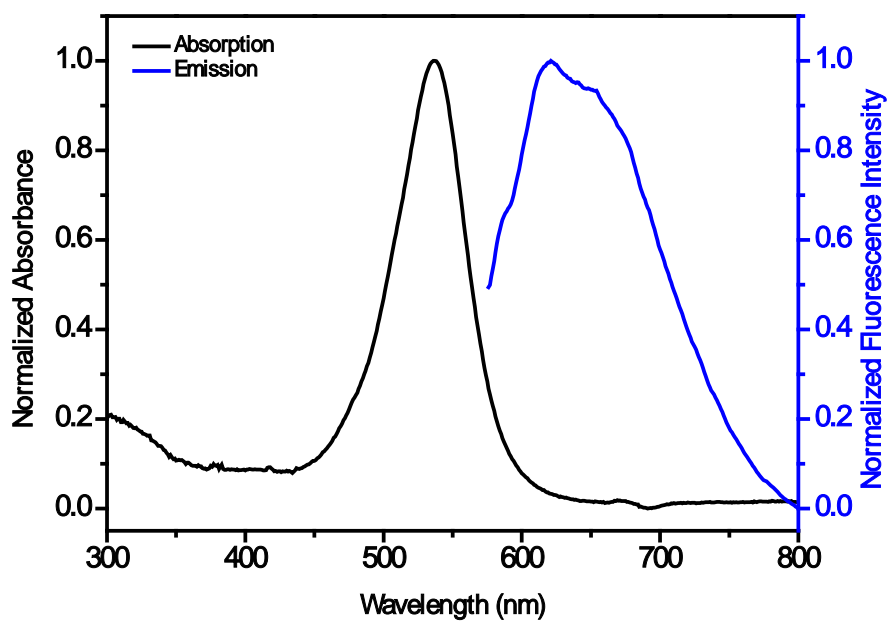

**Figure S38.** Normalized absorption and emission spectra of BODIPY dye **D<sub>a</sub>** in methylene chloride solution (excitation wavelength was at 550 nm)

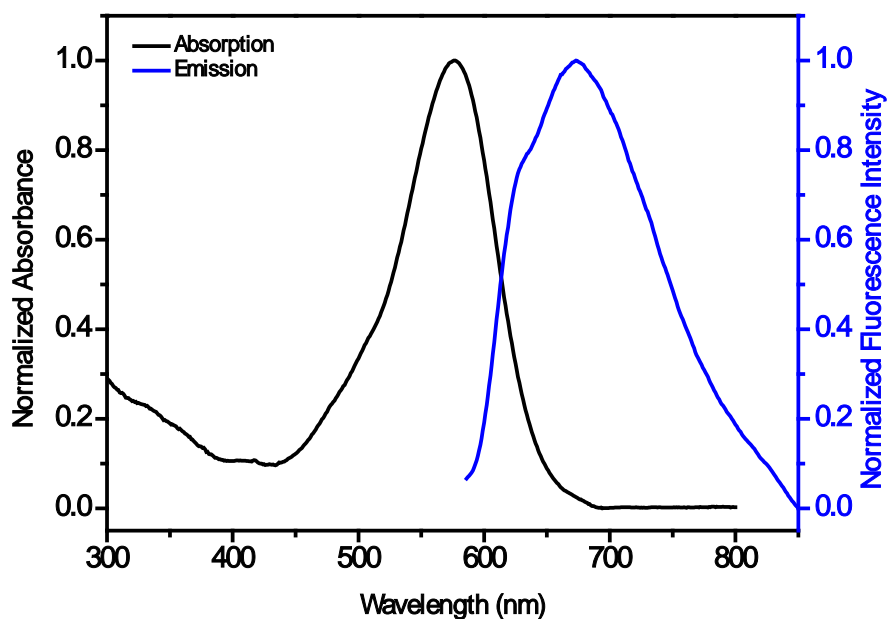

**Figure S39.** Normalized absorption and emission spectra of BODIPY dye E<sub>a</sub> in methylene chloride solution (excitation wavelength was at 560 nm)

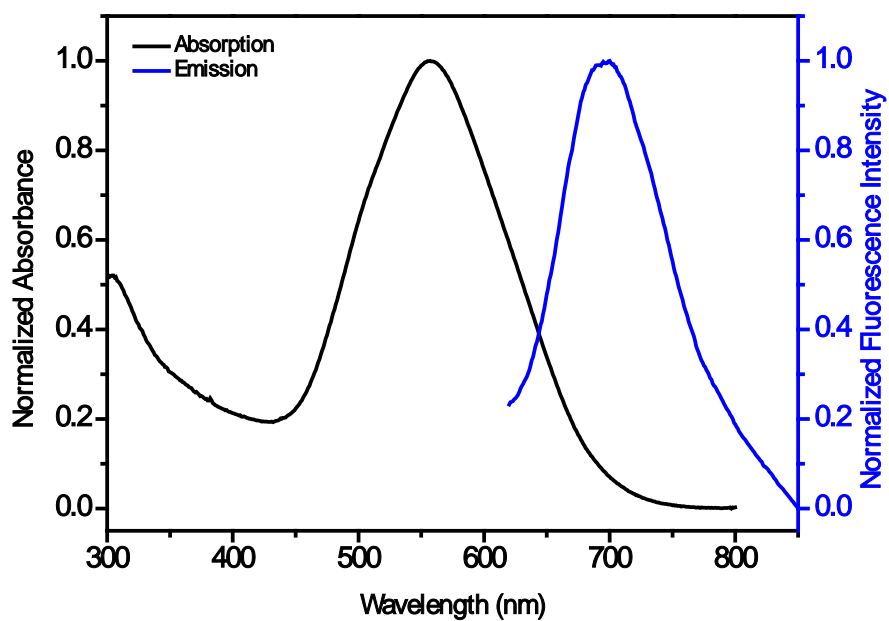

**Figure S40.** Normalized absorption and emission spectra of BODIPY dye E<sub>b</sub> (4 μM) in aqueous solution (excitation wavelength was at 550 nm).

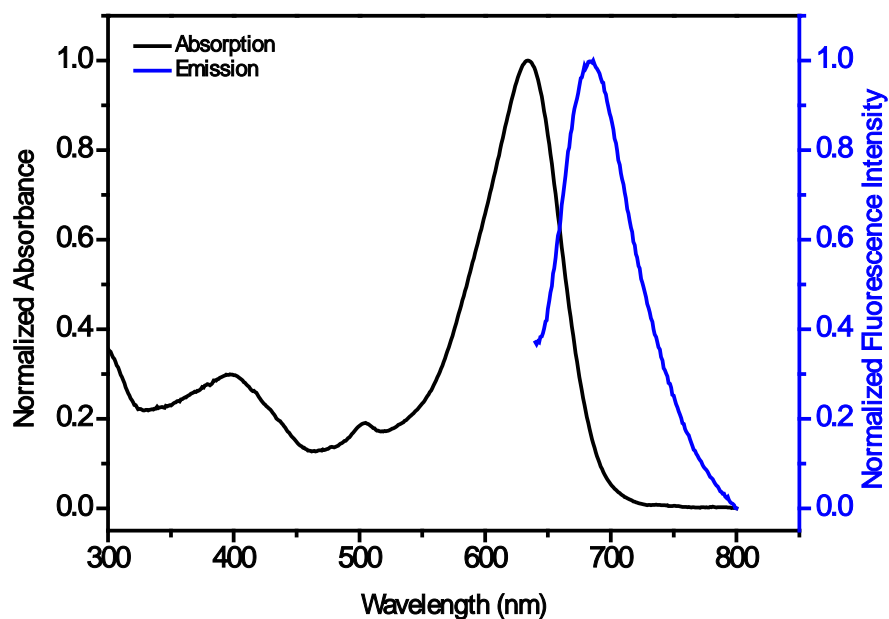

**Figure S41.** Normalized absorption and emission spectra of BODIPY dye F<sub>a</sub> in methylene chloride solution (excitation wavelength was at 630 nm).

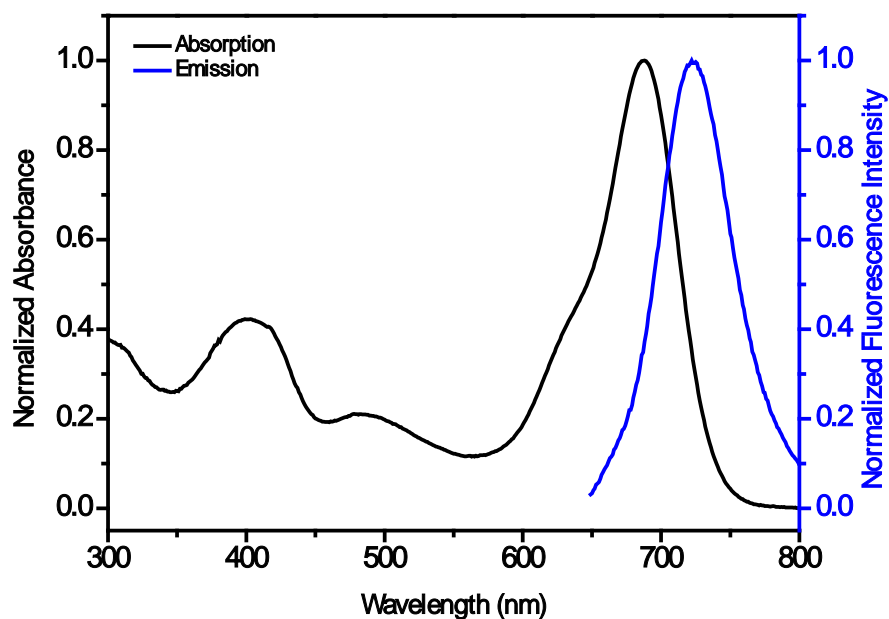

**Figure S42.** Normalized absorption and emission spectra of BODIPY dye G<sub>a</sub> in methylene chloride solution (excitation wavelength was at 630 nm).

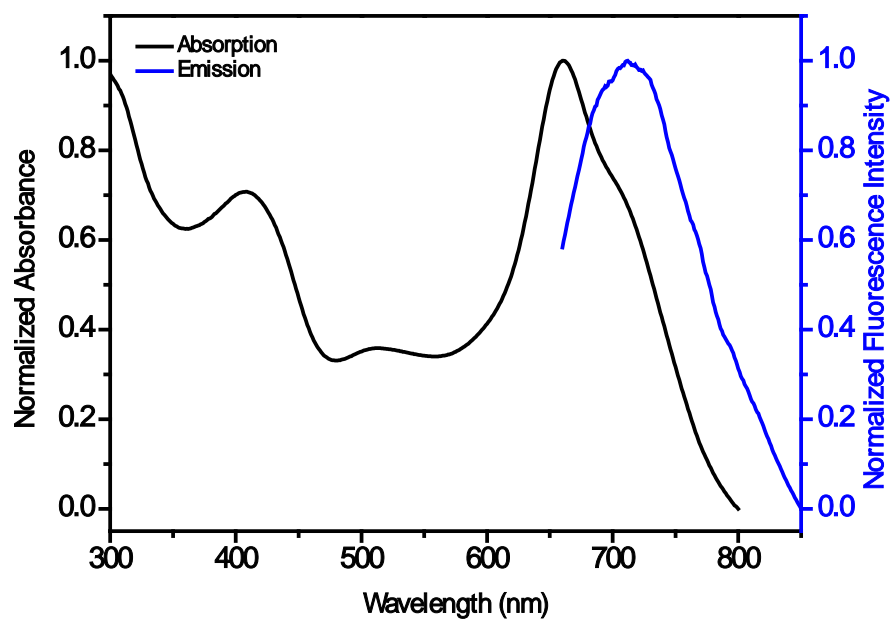

**Figure S43.** Normalized absorption and emission spectra of BODIPY dye  $G_b$  ( $4 \mu\text{M}$ ) in aqueous solution (excitation wavelength was at 650 nm).

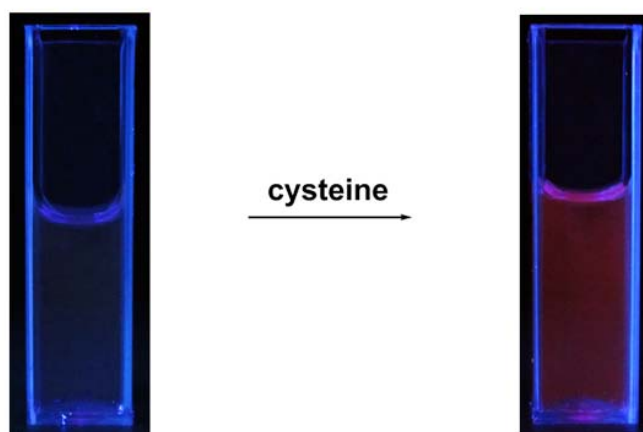

**Figure S44.** Visualized Images of BODIPY dye  $E_b$  ( $20 \mu\text{M}$ ) in  $0.01\text{M}$  PBS buffer pH 7.4 in the absence and presence of L-cysteine ( $10 \text{mM}$ ). Images were taken under a transilluminator. Excitation wavelength was at  $470 \text{nm}$ .

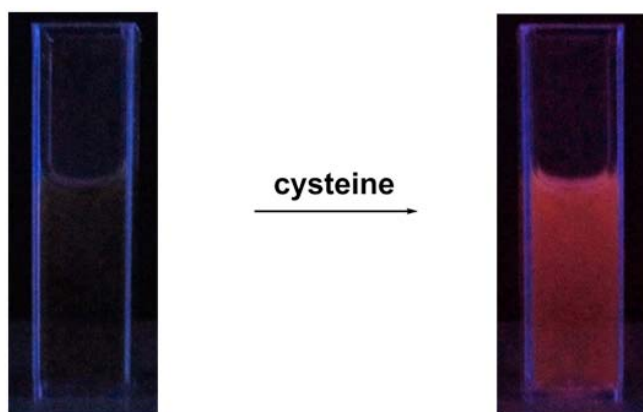

**Figure S45.** Visualized images of BODIPY dye  $G_b$  ( $20 \mu\text{M}$ ) in  $0.01\text{M}$  PBS buffer pH 7.4 in the absence and presence of L-cysteine ( $10 \text{mM}$ ). Images were taken under a transilluminator. Excitation wavelength was at  $470 \text{nm}$ .

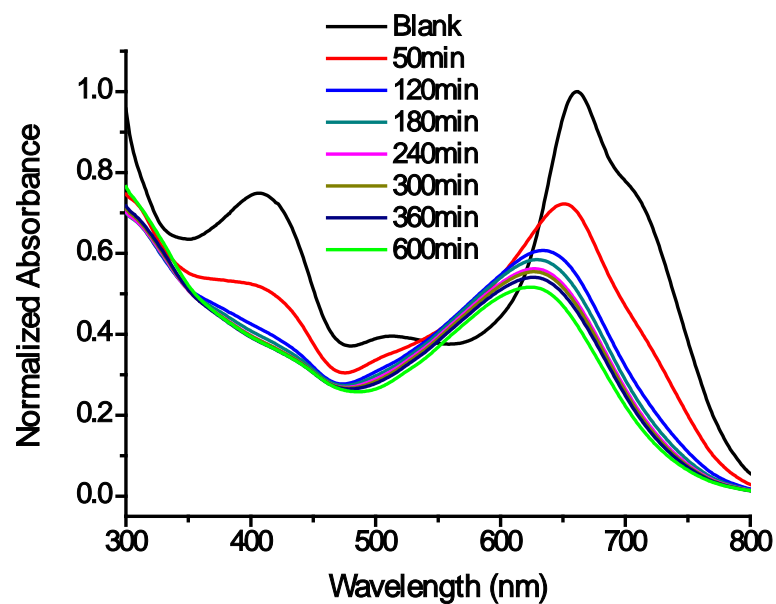

**Figure S46.** Normalized absorption spectra of BODIPY dye  $G_b$  ( $20 \mu\text{M}$ ) in 0.01 M PBS buffer pH 7.4 in the absence and presence of L-cysteine (10 mM) at different times.

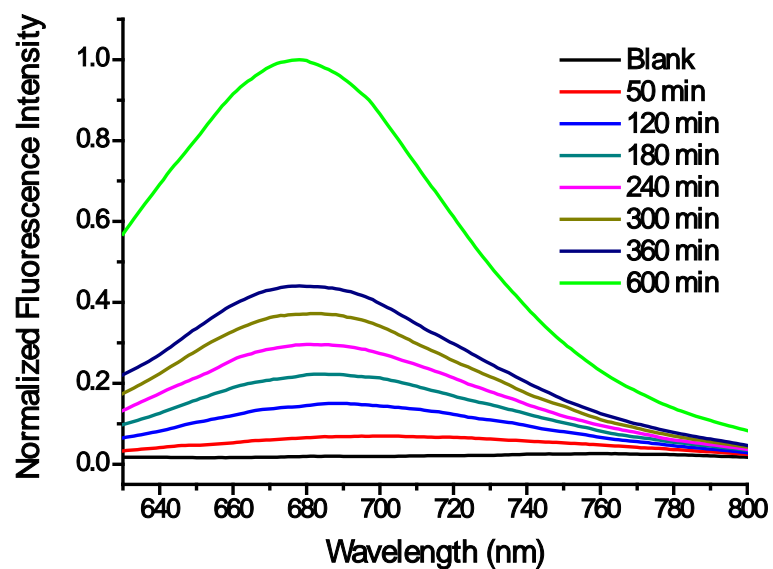

**Figure S47.** Normalized fluorescence spectra of BODIPY dye  $G_b$  ( $20 \mu\text{M}$ ) in 0.01 M PBS buffer pH 7.4 in the absence and presence of L-cysteine (10 mM) at different times. Excitation wavelength was at 620 nm.

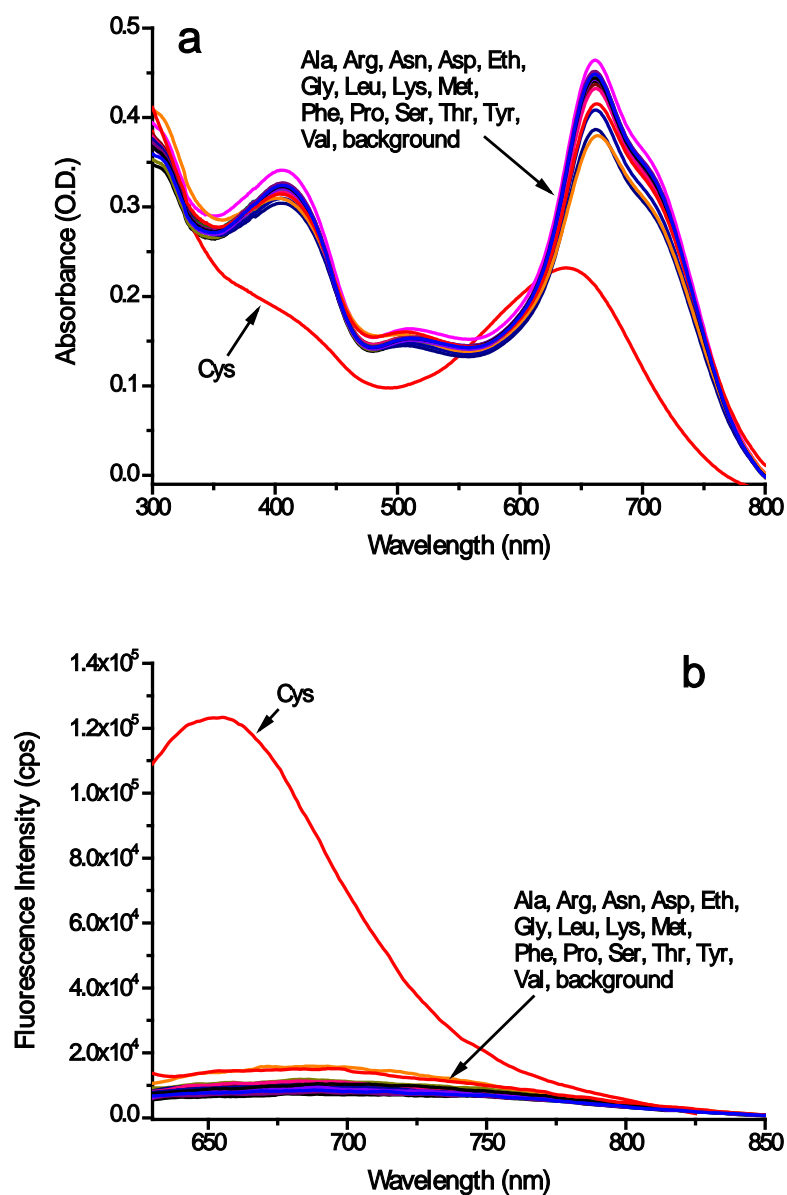

**Figure S48.** Absorption (a) and Emission (b) spectra of BODIPY dye  $G_b$  ( $10 \mu\text{M}$ ) in the absence and presence of various amino acids ( $5 \text{ mM}$ ). ( $\lambda_{\text{ex}}=620 \text{ nm}$ )

### References

1. C. A. Parker and W. T. Rees, *Analyst*, 1960, **85**, 587 - 600.
2. T. Yogo, Y. Urano, Y. Ishitsuka, F. Maniwa and T. Nagano, *J. Am. Chem. Soc.*, 2005, **127**, 12162-12163.
3. S. Maruyama, K. Kikuchi, T. Hirano, Y. Urano and T. Nagano, *J. Am. Chem. Soc.*, 2002, **124**, 10650-10651.
4. Y. Gabe, Y. Urano, K. Kikuchi, H. Kojima and T. Nagano, *J. Am. Chem. Soc.*, 2004, **126**, 3357-3367.
5. L. Jiao, C. Yu, J. Li, Z. Wang, M. Wu and E. Hao, *J. Org. Chem.*, 2009, **74**, 7525-7528.
